# Supplementary material for: Synthesis of paracyclophanes with planar and central chirality: kinetic resolution of [2.2]paracyclophane aldimines via palladium-catalyzed addition of arylboronic acids
Source: Royal Society of Chemistry journal article supplement (doi:10.1039/c9qo01011d), 2019-01-01

## Supporting Information

### Table of Contents

|                                                                          |        |
|--------------------------------------------------------------------------|--------|
| 1. General and Materials.....                                            | S1     |
| 2. General Procedure for Synthesis of [2.2]Paracyclophane Aldimines..... | S1-2   |
| 3. General Procedure for Kinetic Resolution.....                         | S3-9   |
| 4. Elaborations of the Recovered Material and Product.....               | S10-13 |
| 5. Scale-up Reaction.....                                                | S13    |
| 6. Determination of Absolute Configuration.....                          | S14-15 |
| 7. References.....                                                       | S16    |
| 8. Copy of NMR and HPLC for the Compounds.....                           | S17-99 |

## 1. General and Materials

Commercially available reagents were used without further purification. Solvents were treated prior to use according to the standard methods.  $^1\text{H}$  NMR,  $^{13}\text{C}$  NMR and  $^{19}\text{F}$  NMR spectra were recorded at room temperature in  $\text{CDCl}_3$  on 400 MHz instrument with TMS (tetramethylsilane) as internal standard. Enantiomeric excess was determined by HPLC analysis, using chiral column described below in detail. Optical rotations were measured by polarimeter. Flash column chromatography was performed on silica gel (200-300 mesh). All reactions were monitored by TLC analysis or NMR analysis.

**Materials:** Commercially available reagents were used throughout without further purification. The anhydrous solvents were also purchased without the further purification.

## 2. General Procedure for Synthesis of [2.2]Paracyclophane Aldimines

The [2.2]paracyclophane aldimines **1** could be synthesized from formyl[2.2]paracyclophanes **5** and *p*-toluenesulfonamide in the presence of tetraethyl orthosilicate according to the known literature procedure.<sup>[1]</sup> The intermediate formyl[2.2]paracyclophanes **5a** and **5b** were synthesized from the [2.2]paracyclophanes **S1** according to the known literature procedures.<sup>[2]</sup> Starting material 4-methyl[2.2]paracyclophane **S1b** was prepared from 4-formyl[2.2]paracyclophane **5a** according to the known literature procedures.<sup>[3]</sup>

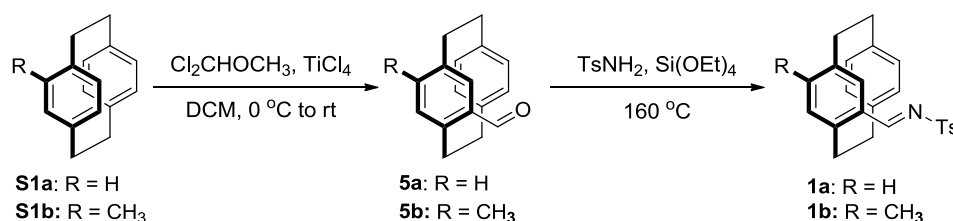

[2.2]Paracyclophanes **S1** (14.7 mmol) were dissolved in dichloromethane (50 mL) and cooled to 0 °C. Titanium tetrachloride (3.22 mL, 29.4 mmol) and dichloromethoxymethane (1.39 mL, 15.4 mmol) were added subsequently. The mixture was stirred at room temperature overnight, poured into water (30 mL) and stirred at room temperature for another 2 h. The two phases were separated, and the aqueous phase was extracted with dichloromethane (20 mL×3). The combined organic phases were dried by anhydrous sodium sulfate and concentrated under reduced pressure. The residue was purified by column chromatography on silica gel using hexanes, ethyl acetate and dichloromethane as eluent to afford the aldehyde **5a** or **5b**.

**4-Formyl-7-methyl[2.2]paracyclophane 5b:** The reaction was conducted by using 4-methyl[2.2]paracyclophane **S1b** (3.528 g, 14.7 mmol), affording **5b** 2.293 g, 62% yield, white solid, mp

= 173-175 °C, the known compound,<sup>[4]</sup>  $R_f$  = 0.50 (hexanes/ethyl acetate 10/1).  $^1\text{H}$  NMR (400 MHz,  $\text{CDCl}_3$ )  $\delta$  9.93 (s, 1H), 6.91 (s, 1H), 6.81-6.71 (m, 1H), 6.51-6.39 (m, 3H), 6.22 (s, 1H), 4.12-3.99 (m, 1H), 3.41-3.29 (m, 1H), 3.29-3.14 (m, 2H), 3.07-2.94 (m, 2H), 2.89-2.71 (m, 2H), 2.16 (s, 3H).  $^{13}\text{C}$  NMR (100 MHz,  $\text{CDCl}_3$ )  $\delta$  191.7, 144.3, 143.3, 139.4, 139.4, 139.4, 138.2, 137.6, 134.8, 132.6, 132.5, 132.1, 128.2, 35.2, 33.5, 33.3, 33.3, 20.4. HRMS: Calculated for  $\text{C}_{18}\text{H}_{19}\text{O}$   $[\text{M}+\text{H}]^+$  251.1430, found: 251.1434.

The above aldehyde **5a** or **5b** (6.1 mmol), *p*-toluenesulfonamide (1.044 g, 6.1 mmol) and tetraethyl orthosilicate (1.271 g, 1.36 mL, 6.1 mmol) were combined in a schlenk flask and heated at 160 °C under nitrogen for 12 h. After cooling to room temperature, the reaction mixture was

purified by column chromatography on silica gel using hexanes and dichloromethane as eluent to afford the corresponding aldimine **1a** or **1b**.

(±)-*N*-Tosyl[2.2]paracyclophane-4-methanimine **1a**: The reaction was conducted by using 4-formyl[2.2]paracyclophane **5a** (2.363 g, 10.0 mmol), affording **1a** 4.174 g, 91% yield, yellow solid, mp = 172-174 °C, new compound,  $R_f = 0.50$  (hexanes/ethyl acetate 10/1).  $^1\text{H}$  NMR (400 MHz,  $\text{CDCl}_3$ )  $\delta$  8.98 (s, 1H), 7.98-7.90 (m, 2H), 7.41-7.33 (m, 2H), 7.17 (d,  $J = 1.9$  Hz, 1H), 6.73 (dd,  $J = 7.8, 1.9$  Hz, 1H), 6.59 (d,  $J = 7.8$  Hz, 1H), 6.56-6.45 (m, 2H), 6.35 (dd,  $J = 7.9, 1.8$  Hz, 1H), 6.13 (dd,  $J = 7.9, 1.8$  Hz, 1H), 3.95-3.83 (m, 1H), 3.27-2.92 (m, 6H), 2.88-2.79 (m, 1H), 2.43 (s, 3H).  $^{13}\text{C}$  NMR (100 MHz,  $\text{CDCl}_3$ )  $\delta$  168.6, 145.5, 144.5, 141.1, 139.6, 139.1, 139.0, 136.1, 135.8, 135.8, 133.3, 133.0, 132.5, 132.2, 132.0, 129.9, 127.9, 35.5, 35.3, 34.9, 34.2, 21.8. HRMS: Calculated for  $\text{C}_{24}\text{H}_{24}\text{NO}_2\text{S}$   $[\text{M}+\text{H}]^+$  390.1522, found: 390.1525.

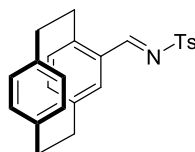

(±)-*N*-Tosyl-7-methyl[2.2]paracyclophane-4-methanimine **1b**: The reaction was conducted by using **5b** (1.529 g, 6.1 mmol), affording **1b** 1.160 g, 47% yield, yellow solid, mp = 216-218 °C, new compound,  $R_f = 0.50$  (hexanes/ethyl acetate 5/1).  $^1\text{H}$  NMR (400 MHz,  $\text{CDCl}_3$ )  $\delta$  8.97 (s, 1H), 8.05-7.82 (m, 2H), 7.42-7.31 (m, 2H), 7.07 (s, 1H), 6.75 (dd,  $J = 7.9, 1.9$  Hz, 1H), 6.43 (dd,  $J = 7.9, 1.8$  Hz, 1H), 6.36 (dd,  $J = 7.9, 1.8$  Hz, 1H), 6.27-6.15 (m, 2H), 3.96-3.79 (m, 1H), 3.35-3.09 (m, 3H), 3.04-2.91 (m, 1H), 2.88-2.71 (m, 3H), 2.43 (s, 3H), 2.15 (s, 3H).  $^{13}\text{C}$  NMR (100 MHz,  $\text{CDCl}_3$ )  $\delta$  168.6, 145.7, 145.6, 144.4, 139.9, 139.5, 139.0, 138.2, 137.2, 136.2, 132.4, 132.3, 132.1, 130.4, 129.9, 128.3, 127.9, 35.5, 33.9, 33.6, 33.1, 21.8, 20.6. HRMS: Calculated for  $\text{C}_{25}\text{H}_{26}\text{NO}_2\text{S}$   $[\text{M}+\text{H}]^+$  404.1679, found: 404.1676.

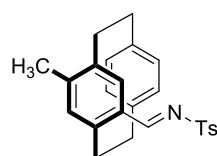

4-Methoxy-5-formyl[2.2]paracyclophane **5c** was synthesized from the [2.2]paracyclophane **S1a** according to the known literature procedure.<sup>[5]</sup>

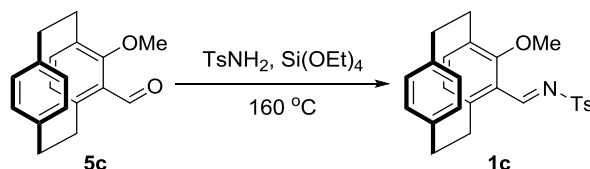

The aldehyde **5c** (0.173 g, 0.7 mmol), *p*-toluenesulfonamide (0.123 g, 0.7 mmol) and tetraethyl orthosilicate (0.150 g, 0.16 mL, 0.7 mmol) were combined in a schlenk flask and heated at 160 °C under nitrogen for 12 h. After cooling to room temperature, the reaction mixture was purified by column chromatography on silica gel using hexanes and ethyl acetate as eluent to afford the corresponding aldimine **1c**.

(±)-*N*-Tosyl-4-methoxy[2.2]paracyclophane-5-methanimine **1c**: 0.195 g, 72% yield, yellow solid, mp = 61-63 °C, new compound,  $R_f = 0.35$  (hexanes/ethyl acetate 10/1).  $^1\text{H}$  NMR (400 MHz,  $\text{CDCl}_3$ )  $\delta$  9.09 (s, 1H), 8.02-7.90 (m, 2H), 7.41-7.33 (m, 2H), 6.73-6.64 (m, 2H), 6.54-6.48 (m, 1H), 6.45-6.36 (m, 2H), 6.05-5.96 (m, 1H), 4.23-4.06 (m, 1H), 3.76 (s, 3H), 3.36-3.23 (m, 1H), 3.17-2.94 (m, 3H), 2.80-2.59 (m, 3H), 2.44 (s, 3H).  $^{13}\text{C}$  NMR (100 MHz,  $\text{CDCl}_3$ )  $\delta$  167.7, 163.5, 145.9, 144.3, 141.7, 139.3, 139.2, 135.9, 133.5, 132.4, 131.9, 131.6, 131.1, 129.8, 129.3, 127.9, 126.1, 62.5, 35.6, 34.1, 33.4, 31.2, 21.7. HRMS: Calculated for  $\text{C}_{25}\text{H}_{26}\text{NO}_3\text{S}$   $[\text{M}+\text{H}]^+$  420.1628, found: 420.1634.

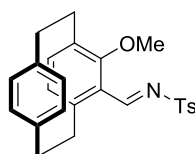

### 3. General Procedure for Kinetic Resolution

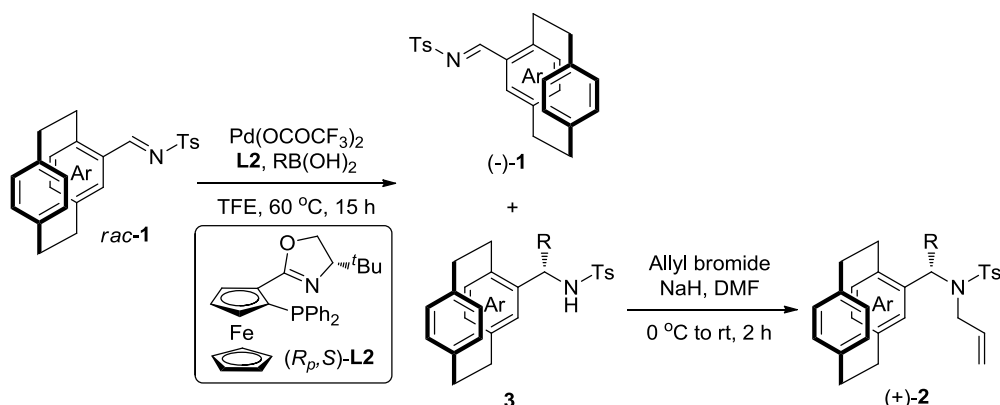

A schlenk tube (25 mL) was charged with  $\text{Pd}(\text{OCOCF}_3)_2$  (3.3 mg, 0.01 mmol, 5 mol%) and (*R<sub>p</sub>,S*)-**L2** (5.0 mg, 0.01 mmol, 5 mol%) under nitrogen, and degassed anhydrous acetone (1.5 mL) was added. The mixture was stirred at room temperature for 1 h. The solvent was removed under vacuum to give the catalyst. Then substrate *rac*-1 (77.9 mg, 0.20 mmol), arylboronic acid (0.20 mmol) and 2,2,2-trifluoroethanol (4.0 mL) were added into the tube under nitrogen. The mixture was heated to 60 °C. After stirring at 60 °C for 15 h, the reaction mixture was cooled to room temperature, and the solvent was removed by rotary evaporation. The resulting mixture was dried under vacuum and the conversion of *rac*-1 was confirmed by  $^1\text{H}$  NMR analysis with benzyl ether as internal standard. The solvent was removed in *vacuo*, the recovered material (-)-1 and addition product **3** were isolated by column chromatography on silica gel using hexanes and ethyl acetate as eluent.

To a solution of the addition product **3** in dry *N,N*-dimethylformamide (DMF, 1.0 mL) was added sodium hydride (15 mg, 0.38 mmol, 60% wt.) at 0 °C, and then allyl bromide (36 mg, 26.0  $\mu\text{L}$ , 0.30 mmol) was added dropwise. The reaction mixture was warmed to room temperature and stirred at room temperature for 2 h. Water (5.0 mL) was added, and extracted with ethyl acetate (10 mL $\times$ 3). The combined organic layer was washed with brine, dried by anhydrous sodium sulfate and filtered, concentrated in *vacuo* and analyzed by crude  $^1\text{H}$  NMR to determine diastereomeric ratio. The solvent was removed in *vacuo*, and the residue was purified by column chromatography on silica gel using hexanes and ethyl acetate as eluent to afford the product (+)-2.

**(+)-*N*-Allyl-*N*-{[2.2]paracyclophan-4-yl(phenyl)methyl}-4-methylbenzenesulfonamide (2a):** 48.9 mg, 48% yield, 12:1 dr, white solid, mp = 144-146 °C, new compound,  $R_f = 0.50$  (hexanes/ethyl acetate 10/1), 98.8% ee,  $[\alpha]_D^{20} = 114.70$  (*c* 0.24,  $\text{CHCl}_3$ ).

$^1\text{H}$  NMR (400 MHz,  $\text{CDCl}_3$ )  $\delta$  8.01-7.89 (m, 2H), 7.43-7.35 (m, 2H), 7.24-7.18 (m, 1H), 7.17-7.07 (m, 3H), 6.92-6.84 (m, 2H), 6.76-6.71 (m, 1H), 6.64-6.46 (m, 4H), 6.34 (d,  $J = 7.6$  Hz, 1H), 6.20 (s, 1H), 4.82-4.69 (m, 1H), 4.66-4.50 (m, 2H), 4.05-3.90 (m, 1H), 3.46 (dd,  $J = 15.6, 3.6$  Hz, 1H), 3.31-3.15 (m, 2H), 3.08-2.87 (m, 4H), 2.55-2.38 (m, 2H), 2.50 (s, 3H).  $^{13}\text{C}$  NMR (100 MHz,  $\text{CDCl}_3$ )  $\delta$  143.5, 140.9, 140.0, 139.5, 139.2, 138.9, 138.6, 136.9, 136.0, 134.0, 133.7, 132.6, 132.3, 132.2, 131.4, 130.5, 129.7, 129.4, 128.4, 128.2, 128.0, 117.2, 64.6, 48.5, 35.5, 35.4, 34.6, 34.5, 21.7. HPLC: Chiracel AD-H column, 254 nm, 30 °C, *n*-Hexane/*i*-PrOH = 90/10, flow = 1.0 mL/min, retention time 6.9 min (major) and 7.5 min. HRMS: Calculated for  $\text{C}_{33}\text{H}_{33}\text{KNO}_2\text{S}$   $[\text{M}+\text{K}]^+$  546.1864, found: 546.1861.

***N*-Allyl-*N*-{[2.2]paracyclophan-4-yl(phenyl)methyl}-4-methylbenzenesulfonamide (2a')**: white solid, mp = 176-178 °C, new compound,  $R_f = 0.35$  (hexanes/ethyl acetate 10/1).  $^1\text{H}$  NMR

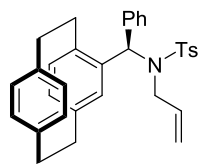

(400 MHz,  $\text{CDCl}_3$ )  $\delta$  7.34-7.27 (m, 2H), 7.26-7.23 (m, 1H), 7.19-7.12 (m, 4H), 6.93 (d,  $J = 8.1$  Hz, 2H), 6.87 (dd,  $J = 7.9, 1.7$  Hz, 1H), 6.62-6.43 (m, 4H), 6.29 (s, 1H), 6.04 (dd,  $J = 7.9, 1.7$  Hz, 1H), 5.68-5.54 (m, 2H), 4.85-4.76 (m, 1H), 4.72-4.59 (m, 1H), 4.00-3.83 (m, 1H), 3.57-3.35 (m, 3H), 3.30-3.20 (m, 1H), 3.05-2.82 (m, 4H), 2.74-2.59 (m, 1H), 2.30 (s, 3H).  $^{13}\text{C}$  NMR (100 MHz,  $\text{CDCl}_3$ )  $\delta$  142.5, 140.3, 140.0, 139.7, 139.3, 138.8, 137.2, 136.2, 136.1, 134.1, 133.3, 133.2, 133.0, 132.2, 129.6, 128.8, 128.7, 128.7, 127.6, 127.6, 116.0, 66.0, 49.9, 35.1, 35.0, 34.7, 33.8, 21.5. HRMS: Calculated for  $\text{C}_{33}\text{H}_{33}\text{KNO}_2\text{S}$   $[\text{M}+\text{K}]^+$  546.1864, found: 546.1827.

**(-)-*N*-Tosyl[2.2]paracyclophane-4-methanimine (1a)**: Kinetic resolution from the addition of [2.2]paracyclophane aldimine **1a** with phenylboronic acid, 30.7 mg, 39% yield, 93.7% ee,  $[\alpha]_{\text{D}}^{20} = -356.96$  ( $c$  0.63,  $\text{CHCl}_3$ ). HPLC: Chiralcel AD-3 column, 254 nm, 30 °C, *n*-Hexane/*i*-PrOH = 80/20, flow = 0.8 mL/min, retention time 16.6 min and 18.9 min (major).

**(+)-*N*-Allyl-*N*-{[2.2]paracyclophan-4-yl(*o*-tolyl)methyl}-4-methylbenzenesulfonamide (2b)**: 51.9 mg, 50% yield, 7:1 dr, white solid, mp = 58-60 °C, new compound,  $R_f = 0.60$  (hexanes/ ethyl acetate 10/1), 98.7% ee,  $[\alpha]_{\text{D}}^{20} = 45.71$  ( $c$  0.28,  $\text{CHCl}_3$ ).  $^1\text{H}$  NMR (400 MHz,

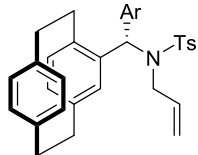

$\text{CDCl}_3$ )  $\delta$  7.96-7.88 (m, 2H), 7.37-7.30 (m, 2H), 7.26-7.23 (m, 1H), 7.19-7.08 (m, 2H), 6.85 (t,  $J = 7.4$  Hz, 1H), 6.77-6.68 (m, 3H), 6.64-6.59 (m, 1H), 6.56-6.46 (m, 3H), 6.32 (d,  $J = 7.5$  Hz, 1H), 4.34-4.23 (m, 3H), 3.96-3.85 (m, 1H), 3.60-3.50 (m, 1H), 3.35-2.90 (m, 7H), 2.69 (s, 3H), 2.54-2.41 (m, 2H), 2.45 (s, 3H).  $^{13}\text{C}$  NMR (100 MHz,  $\text{CDCl}_3$ )  $\delta$  143.6, 140.0, 139.7, 139.4, 139.3, 138.5, 138.2, 137.7, 137.1, 136.0, 133.6, 133.4, 132.6, 132.1, 132.0, 131.1, 130.9, 130.4, 130.3, 129.4, 128.6, 127.9, 125.6, 115.7, 61.1, 47.4, 35.5, 35.4, 34.8, 34.1, 21.6, 20.0. HPLC: Chiralcel AD-H column, 254 nm, 30 °C, *n*-Hexane/*i*-PrOH = 90/10, flow = 1.0 mL/min, retention time 5.3 min (major) and 7.0 min. HRMS: Calculated for  $\text{C}_{34}\text{H}_{35}\text{NaNO}_2\text{S}$   $[\text{M}+\text{Na}]^+$  544.2281, found: 544.2282.

**(-)-*N*-Tosyl[2.2]paracyclophane-4-methanimine (1a)**: Kinetic resolution from the addition of [2.2]paracyclophane aldimine **1a** with 2-methylphenylboronic acid, 29.6 mg, 38% yield, 80.1% ee. HPLC: Chiralcel AD-3 column, 254 nm, 30 °C, *n*-Hexane/*i*-PrOH = 80/20, flow = 0.8 mL/min, retention time 16.7 min and 18.9 min (major).

**(+)-*N*-Allyl-*N*-{[2.2]paracyclophan-4-yl(*m*-tolyl)methyl}-4-methylbenzenesulfonamide (2c)**: 50.7 mg, 49% yield, 12:1 dr, white solid, mp = 63-65 °C, new compound,  $R_f = 0.60$  (hexanes/ethyl acetate 10/1), 98.1% ee,  $[\alpha]_{\text{D}}^{20} = 135.93$  ( $c$  0.32,  $\text{CHCl}_3$ ).  $^1\text{H}$  NMR (400 MHz,

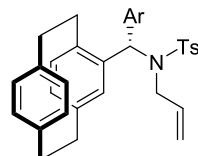

$\text{CDCl}_3$ )  $\delta$  7.98-7.88 (m, 2H), 7.44-7.35 (m, 2H), 7.13-7.07 (m, 1H), 7.03-6.95 (m, 2H), 6.73 (s, 1H), 6.67-6.57 (m, 3H), 6.55-6.45 (m, 3H), 6.32 (d,  $J = 7.6$  Hz, 1H), 6.05 (s, 1H), 4.84-4.73 (m, 1H), 4.68-4.51 (m, 2H), 3.95 (dd,  $J = 16.4, 7.8$  Hz, 1H), 3.45 (dd,  $J = 16.4, 4.3$  Hz, 1H), 3.28-3.13 (m, 2H), 3.09-2.86 (m, 4H), 2.51 (s, 3H), 2.48-2.38 (m, 2H), 2.12 (s, 3H).  $^{13}\text{C}$  NMR (100 MHz,  $\text{CDCl}_3$ )  $\delta$  143.4, 140.7, 140.0, 139.6, 139.2, 139.0, 138.7, 137.9, 137.0, 136.0, 134.3, 133.8, 132.7, 132.3, 132.2, 131.5, 130.5, 130.2, 129.7, 128.7, 128.3, 128.2, 126.3, 117.3, 64.6, 48.6, 35.5, 35.4, 34.6, 34.6, 21.7, 21.4. HPLC: Chiralcel IC column, 254 nm, 30 °C, *n*-Hexane/*i*-PrOH = 90/10, flow = 1.0 mL/min, retention time 15.8 min and 21.7 min (major). HRMS: Calculated for  $\text{C}_{34}\text{H}_{35}\text{NaNO}_2\text{S}$   $[\text{M}+\text{Na}]^+$  544.2281, found: 544.2282.

**(-)-*N*-Tosyl[2.2]paracyclophane-4-methanimine (1a):** Kinetic resolution from the addition of [2.2]paracyclophane aldimine **1a** with 3-methylphenylboronic acid, 21.7 mg, 28% yield, 91.2% ee. HPLC: Chiralcel AD-3 column, 254 nm, 30 °C, *n*-Hexane/*i*-PrOH = 80/20, flow = 0.8 mL/min, retention time 16.6 min and 18.9 min (major).

**(+)-*N*-Allyl-*N*-{[2.2]paracyclophan-4-yl(*p*-tolyl)methyl}-4-methylbenzenesulfonamide (2d):** 55.2 mg, 53% yield, 13:1 dr, white solid, mp = 56-58 °C, new compound,  $R_f = 0.55$  (hexanes/ethyl acetate 10/1), 98.3% ee,  $[\alpha]_D^{20} = 134.91$  (*c* 0.61, CHCl<sub>3</sub>).

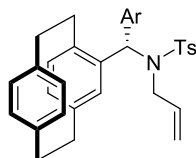

Ar = 4-MeC<sub>6</sub>H<sub>4</sub>

<sup>1</sup>H NMR (400 MHz, CDCl<sub>3</sub>) δ 8.03-7.87 (m, 2H), 7.47-7.34 (m, 2H), 7.09 (d, *J* = 7.7 Hz, 1H), 6.93 (d, *J* = 7.8 Hz, 2H), 6.79-6.69 (m, 3H), 6.59 (t, *J* = 8.0 Hz, 2H), 6.55-6.45 (m, 2H), 6.32 (d, *J* = 7.6 Hz, 1H), 6.15 (s, 1H), 4.82-4.70 (m, 1H), 4.68-4.53 (m, 2H), 4.01-3.87 (m, 1H), 3.51-3.39 (m, 1H), 3.28-3.14 (m, 2H), 3.07-2.86 (m, 4H), 2.56-2.41 (m, 2H), 2.50 (s, 3H) 2.28 (s, 3H). <sup>13</sup>C NMR (100 MHz, CDCl<sub>3</sub>) δ 143.4, 140.0, 139.5, 139.3, 139.0, 138.7, 137.9, 137.7, 137.2, 136.0, 134.2, 133.7, 132.6, 132.3, 132.2, 131.5, 130.5, 129.7, 129.3, 129.0, 128.2, 117.2, 64.4, 48.5, 35.5, 35.4, 34.6, 34.6, 21.7, 21.2. HPLC: Chiralcel AD-H column, 254 nm, 30 °C, *n*-Hexane/*i*-PrOH = 90/10, flow = 1.0 mL/min, retention time 7.1 min and 8.5 min (major). HRMS: Calculated for C<sub>34</sub>H<sub>35</sub>NaNO<sub>2</sub>S [M+Na]<sup>+</sup> 544.2281, found: 544.2284.

**(-)-*N*-Tosyl[2.2]paracyclophane-4-methanimine (1a):** Kinetic resolution from the addition of [2.2]paracyclophane aldimine **1a** with 4-methylphenylboronic acid, 27.8 mg, 36% yield, 88.0% ee. HPLC: Chiralcel AD-3 column, 254 nm, 30 °C, *n*-Hexane/*i*-PrOH = 80/20, flow = 0.8 mL/min, retention time 16.5 min and 18.8 min (major).

**(+)-*N*-Allyl-*N*-{[2.2]paracyclophan-4-yl(4-fluorophenyl)methyl}-4-methylbenzenesulfonamide (2e):** 51.9 mg, 49% yield, 16:1 dr, white solid, mp = 164-166 °C, new compound,  $R_f = 0.45$  (hexanes/ethyl acetate 10/1), 96.3% ee,  $[\alpha]_D^{20} = 105.59$  (*c* 0.25, CHCl<sub>3</sub>).

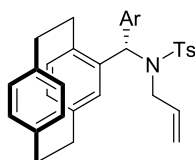

Ar = 4-FC<sub>6</sub>H<sub>4</sub>

<sup>1</sup>H NMR (400 MHz, CDCl<sub>3</sub>) δ 7.96-7.88 (m, 2H), 7.43-7.36 (m, 2H), 7.04 (dd, *J* = 7.8, 1.8 Hz, 1H), 6.89-6.78 (m, 4H), 6.71-6.66 (m, 1H), 6.62-6.57 (m, 1H), 6.55-6.45 (m, 3H), 6.37-6.30 (m, 1H), 6.18 (s, 1H), 4.77-4.58 (m, 3H), 4.05-3.90 (m, 1H), 3.50-3.36 (m, 1H), 3.24-3.13 (m, 2H), 3.04-2.87 (m, 4H), 2.56-2.35 (m, 2H), 2.50 (s, 3H). <sup>13</sup>C NMR (100 MHz, CDCl<sub>3</sub>) δ 162.4 (d, *J*<sub>C-F</sub> = 247.7 Hz), 143.7, 140.2, 139.6, 139.2, 138.9, 138.5, 137.0 (d, *J*<sub>C-F</sub> = 3.3 Hz), 136.8, 136.1, 133.9, 133.7, 132.7, 132.5, 132.3, 131.4, 131.1 (d, *J*<sub>C-F</sub> = 8.1 Hz), 130.4, 129.8, 128.1, 117.4, 115.3 (d, *J*<sub>C-F</sub> = 21.3 Hz), 63.8, 48.5, 35.5, 35.4, 34.6, 34.5, 21.7. <sup>19</sup>F NMR (376 MHz, CDCl<sub>3</sub>) δ -113.8. HPLC: Chiralcel IB column, 254 nm, 30 °C, *n*-Hexane/*i*-PrOH = 80/20, flow = 1.0 mL/min, retention time 5.1 min (major) and 5.5 min. HRMS: Calculated for C<sub>33</sub>H<sub>32</sub>FN<sub>2</sub>O<sub>2</sub>S [M+Na]<sup>+</sup> 548.2030, found: 548.2026.

**(-)-*N*-Tosyl[2.2]paracyclophane-4-methanimine (1a):** Kinetic resolution from the addition of [2.2]paracyclophane aldimine **1a** with 4-fluorophenylboronic acid, 33.8 mg, 43% yield, 99.2% ee. HPLC: Chiralcel AD-3 column, 254 nm, 30 °C, *n*-Hexane/*i*-PrOH = 80/20, flow = 0.8 mL/min, retention time 16.4 min and 18.6 min (major).

**(+)-*N*-Allyl-*N*-{[2.2]paracyclophan-4-yl(4-(trifluoromethyl)phenyl)methyl}-4-methylbenzenesulfonamide (2f):** 58.2 mg, 51% yield, >20:1 dr, white solid, mp = 108-110 °C, new compound,

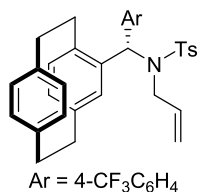

$R_f = 0.43$  (hexanes/ethyl acetate 10/1), 98.7% ee,  $[\alpha]_D^{20} = 106.49$  ( $c$  0.20, CHCl<sub>3</sub>). <sup>1</sup>H NMR (400 MHz, CDCl<sub>3</sub>)  $\delta$  7.96-7.87 (m, 2H), 7.45-7.36 (m, 4H), 7.08-7.00 (m, 3H), 6.72-6.67 (m, 1H), 6.64-6.58 (m, 1H), 6.56-6.47 (m, 3H), 6.35 (d,  $J = 7.6$  Hz, 1H), 6.27 (s, 1H), 4.74-4.57 (m, 3H), 4.02-3.92 (m, 1H), 3.50-3.38 (m, 1H), 3.26-3.14 (m, 2H), 3.07-2.89 (m, 4H), 2.57-2.43 (m, 1H), 2.51 (s, 3H), 2.39-2.27 (m, 1H). <sup>13</sup>C NMR (100 MHz, CDCl<sub>3</sub>)  $\delta$  145.1, 143.8, 140.3, 139.6, 139.1, 138.7, 138.3, 136.2, 135.9, 133.6, 133.5, 132.7, 132.7, 132.4, 131.4, 130.4, 130.2 (q,  $J_{C-F} = 32.4$  Hz), 129.8, 129.8, 128.1, 125.3 (q,  $J_{C-F} = 3.7$  Hz), 124.0 (q,  $J_{C-F} = 272.2$  Hz), 117.5, 64.0, 48.6, 35.4, 35.4, 34.6, 34.5, 21.7. <sup>19</sup>F NMR (376 MHz, CDCl<sub>3</sub>)  $\delta$  -62.5. HPLC: Chiralcel IB column, 254 nm, 30 °C, *n*-Hexane/*i*-PrOH = 90/10, flow = 1.0 mL/min, retention time 5.9 min (major) and 6.6 min. HRMS: Calculated for C<sub>34</sub>H<sub>36</sub>F<sub>3</sub>N<sub>2</sub>O<sub>2</sub>S [M+NH<sub>4</sub>]<sup>+</sup> 593.2444, found: 593.2462.

**(-)-*N*-Tosyl[2.2]paracyclophane-4-methanimine (1a):** Kinetic resolution from the addition of [2.2]paracyclophane aldimine **1a** with 4-trifluoromethylphenylboronic acid, 28.8 mg, 37% yield, 98.5% ee. HPLC: Chiralcel AD-3 column, 254 nm, 30 °C, *n*-Hexane/*i*-PrOH = 80/20, flow = 0.8 mL/min, retention time 16.1 min and 18.3 min (major).

**(+)-*N*-Allyl-*N*-{[2.2]paracyclophan-4-yl(4-chlorophenyl)methyl}-4-methylbenzenesulfonamide (2g):** 54.1 mg, 50% yield, >20:1 dr, white solid, mp = 139-141 °C, new compound,  $R_f = 0.43$

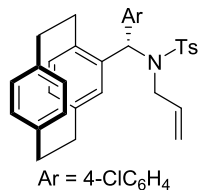

(hexanes/ethyl acetate 10/1), 98.9% ee,  $[\alpha]_D^{20} = 134.50$  ( $c$  0.82, CHCl<sub>3</sub>). <sup>1</sup>H NMR (400 MHz, CDCl<sub>3</sub>)  $\delta$  7.96-7.88 (m, 2H), 7.43-7.36 (m, 2H), 7.15-7.08 (m, 2H), 7.05 (dd,  $J = 7.8, 1.4$  Hz, 1H), 6.86-6.79 (m, 2H), 6.72-6.67 (m, 1H), 6.64-6.57 (m, 1H), 6.56-6.46 (m, 3H), 6.34 (d,  $J = 7.6$  Hz, 1H), 6.17 (s, 1H), 4.80-4.60 (m, 3H), 4.03-3.88 (m, 1H), 3.49-3.35 (m, 1H), 3.25-3.14 (m, 2H), 3.06-2.89 (m, 4H), 2.55-2.45 (m, 1H), 2.50 (s, 3H), 2.44-2.33 (m, 1H). <sup>13</sup>C NMR (100 MHz, CDCl<sub>3</sub>)  $\delta$  143.7, 140.2, 139.6, 139.5, 139.1, 138.8, 138.4, 136.4, 136.1, 133.9, 133.8, 133.6, 132.7, 132.6, 132.3, 131.4, 130.7, 130.4, 129.8, 128.6, 128.1, 117.5, 63.8, 48.5, 35.4, 35.4, 34.6, 34.5, 21.7. HPLC: Chiralcel IB column, 254 nm, 30 °C, *n*-Hexane/*i*-PrOH = 80/20, flow = 0.8 mL/min, retention time 6.4 min (major) and 7.0 min. HRMS: Calculated for C<sub>33</sub>H<sub>36</sub>ClN<sub>2</sub>O<sub>2</sub>S [M+NH<sub>4</sub>]<sup>+</sup> 559.2181, found: 559.2175 (<sup>35</sup>Cl), 561.2160 (<sup>37</sup>Cl).

**(-)-*N*-Tosyl[2.2]paracyclophane-4-methanimine (1a):** Kinetic resolution from the addition of [2.2]paracyclophane aldimine **1a** with 4-chlorophenylboronic acid, 31.2 mg, 40% yield, 99.6% ee. HPLC: Chiralcel AD-3 column, 254 nm, 30 °C, *n*-Hexane/*i*-PrOH = 80/20, flow = 0.8 mL/min, retention time 16.4 min and 18.6 min (major).

**(+)-*N*-Allyl-*N*-{[2.2]paracyclophan-4-yl(3-fluorophenyl)methyl}-4-methylbenzenesulfonamide (2h):** 52.2 mg, 50% yield, >20:1 dr, white solid, mp = 134-136 °C, new compound,  $R_f = 0.43$

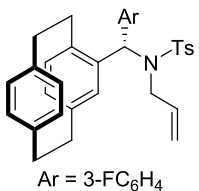

(hexanes/ethyl acetate 10/1), 98.9% ee,  $[\alpha]_D^{20} = 123.93$  ( $c$  0.66, CHCl<sub>3</sub>). <sup>1</sup>H NMR (400 MHz, CDCl<sub>3</sub>)  $\delta$  7.99-7.90 (m, 2H), 7.45-7.36 (m, 2H), 7.16-7.02 (m, 2H), 6.95-6.84 (m, 1H), 6.75-6.67 (m, 2H), 6.64-6.58 (m, 1H), 6.57-6.46 (m, 4H), 6.34 (d,  $J = 7.6$  Hz, 1H), 6.16 (s, 1H), 4.78-4.59 (m, 3H), 4.04-3.93 (m, 1H), 3.49-3.38 (m, 1H), 3.26-3.14 (m, 2H), 3.06-2.89 (m, 4H), 2.57-2.46 (m, 1H), 2.51 (s, 3H), 2.46-2.37 (m, 1H). <sup>13</sup>C NMR (100 MHz, CDCl<sub>3</sub>)  $\delta$  162.7 (d,  $J_{C-F} = 246.7$  Hz), 143.8, 143.5 (d,  $J_{C-F} = 6.6$  Hz), 140.2, 139.6, 139.2, 138.7, 138.5, 136.2, 136.1, 133.8, 133.7, 132.7, 132.6, 132.3, 131.4, 130.4, 129.8 (d,  $J_{C-F} = 8.0$  Hz), 129.8, 128.1, 125.1 (d,  $J_{C-F} = 2.8$  Hz),

117.4, 116.4 (d,  $J_{C-F}$  = 22.1 Hz), 115.0 (d,  $J_{C-F}$  = 21.1 Hz), 64.0 (d,  $J_{C-F}$  = 1.6 Hz), 48.5, 35.4, 35.4, 34.6, 34.5, 21.7.  $^{19}\text{F}$  NMR (376 MHz,  $\text{CDCl}_3$ )  $\delta$  -112.6. HPLC: Chiracel IA column, 254 nm, 30  $^\circ\text{C}$ , *n*-Hexane/*i*-PrOH = 90/10, flow = 1.0 mL/min, retention time 6.4 min (major) and 7.2 min. HRMS: Calculated for  $\text{C}_{33}\text{H}_{32}\text{FNaNO}_2\text{S}$   $[\text{M}+\text{Na}]^+$  548.2030, found: 548.2061.

(-)-*N*-Tosyl[2.2]paracyclophane-4-methanimine (**1a**): Kinetic resolution from the addition of [2.2]paracyclophane aldimine **1a** with 3-fluorophenylboronic acid, 31.9 mg, 41% yield, 97.4% ee. HPLC: Chiralcel AD-3 column, 254 nm, 30  $^\circ\text{C}$ , *n*-Hexane/*i*-PrOH = 80/20, flow = 0.8 mL/min, retention time 16.2 min and 18.3 min (major).

(+)-*N*-Allyl-*N*-{[2.2]paracyclophan-4-yl(3-chlorophenyl)methyl}-4-methylbenzenesulfonamide (**2i**): 54.4 mg, 50% yield, >20:1 dr, white solid, mp = 56-58  $^\circ\text{C}$ , new compound,  $R_f$  = 0.41

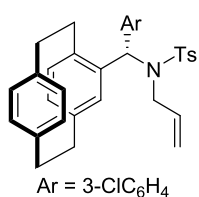

(hexanes/ethyl acetate 10/1), 99.4% ee,  $[\alpha]_D^{20}$  = 114.30 (*c* 1.10,  $\text{CHCl}_3$ ).  $^1\text{H}$  NMR (400 MHz,  $\text{CDCl}_3$ )  $\delta$  7.98-7.89 (m, 2H), 7.47-7.38 (m, 2H), 7.21-7.15 (m, 1H), 7.10-7.01 (m, 2H), 6.82-6.75 (m, 1H), 6.73-6.68 (m, 1H), 6.63-6.58 (m, 2H), 6.58-6.47 (m, 3H), 6.34 (d,  $J$  = 7.6 Hz, 1H), 6.06 (s, 1H), 4.86-4.58 (m, 3H), 4.07-3.92 (m, 1H), 3.52-3.37 (m, 1H), 3.29-3.13 (m, 2H), 3.08-2.85 (m, 4H), 2.58-2.31 (m, 2H), 2.52 (s, 3H).  $^{13}\text{C}$  NMR (100 MHz,  $\text{CDCl}_3$ )  $\delta$  143.9, 142.9, 140.2, 139.6, 139.1, 138.6, 138.4, 136.2, 136.1, 134.3, 133.8, 133.7, 132.7, 132.6, 132.3, 131.4, 130.4, 129.9, 129.6, 129.5, 128.2, 128.1, 127.4, 117.6, 64.0, 48.6, 35.4, 35.4, 34.6, 34.5, 21.7. HPLC: Chiralcel IC column, 254 nm, 30  $^\circ\text{C}$ , *n*-Hexane/*i*-PrOH = 80/20, flow = 0.8 mL/min, retention time 11.2 min and 13.2 (major) min. HRMS: Calculated for  $\text{C}_{33}\text{H}_{36}\text{ClN}_2\text{O}_2\text{S}$   $[\text{M}+\text{NH}_4]^+$  559.2181, found: 559.2175 ( $^{35}\text{Cl}$ ), 561.2155 ( $^{37}\text{Cl}$ ).

(-)-*N*-Tosyl[2.2]paracyclophane-4-methanimine (**1a**): Kinetic resolution from the addition of [2.2]paracyclophane aldimine **1a** with 3-chlorophenylboronic acid, 32.7 mg, 42% yield, 98.4% ee. HPLC: Chiralcel AD-3 column, 254 nm, 30  $^\circ\text{C}$ , *n*-Hexane/*i*-PrOH = 80/20, flow = 0.8 mL/min, retention time 16.3 min and 18.5 min (major).

(+)-*N*-Allyl-*N*-{[2.2]paracyclophan-4-yl(4-methoxyphenyl)methyl}-4-methylbenzenesulfonamide (**2j**): 51.6 mg, 48% yield, 13:1 dr, white solid, mp = 65-67  $^\circ\text{C}$ , new compound,  $R_f$  = 0.25

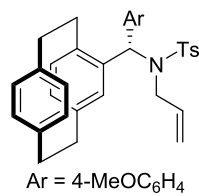

(hexanes/ethyl acetate 10/1), 96.5% ee,  $[\alpha]_D^{20}$  = 135.32 (*c* 0.30,  $\text{CHCl}_3$ ).  $^1\text{H}$  NMR (400 MHz,  $\text{CDCl}_3$ )  $\delta$  7.97-7.88 (m, 2H), 7.42-7.35 (m, 2H), 7.07 (dd,  $J$  = 7.8, 1.5 Hz, 1H), 6.80-6.74 (m, 2H), 6.73-6.69 (m, 1H), 6.68-6.62 (m, 2H), 6.61-6.44 (m, 4H), 6.32 (d,  $J$  = 7.6 Hz, 1H), 6.13 (s, 1H), 4.81-4.72 (m, 1H), 4.70-4.59 (m, 2H), 3.98-3.89 (m, 1H), 3.75 (s, 3H), 3.47-3.38 (m, 1H), 3.25-3.14 (m, 2H), 3.05-2.88 (m, 4H), 2.56-2.43 (m, 2H), 2.49 (s, 3H).  $^{13}\text{C}$  NMR (100 MHz,  $\text{CDCl}_3$ )  $\delta$  159.2, 143.4, 140.0, 139.5, 139.3, 139.0, 138.7, 137.4, 136.0, 134.3, 133.7, 133.1, 132.7, 132.3, 132.2, 131.5, 130.6, 130.5, 129.7, 128.2, 117.2, 113.6, 64.1, 55.3, 48.5, 35.5, 35.4, 34.6, 34.6, 21.7. HPLC: Chiralcel AD-H column, 254 nm, 30  $^\circ\text{C}$ , *n*-Hexane/*i*-PrOH = 80/20, flow = 1.0 mL/min, retention time 6.5 min and 7.2 min (major). HRMS: Calculated for  $\text{C}_{34}\text{H}_{35}\text{KNO}_3\text{S}$   $[\text{M}+\text{K}]^+$  576.1969, found: 576.1959.

(-)-*N*-Tosyl[2.2]paracyclophane-4-methanimine (**1a**): Kinetic resolution from the addition of [2.2]paracyclophane aldimine **1a** with 4-methoxyphenylboronic acid, 35.1 mg, 45% yield, 83.9% ee. HPLC: Chiralcel AD-3 column, 254 nm, 30  $^\circ\text{C}$ , *n*-Hexane/*i*-PrOH = 80/20, flow = 0.8 mL/min, retention time 16.3 min and 18.5 min (major).



**(+)-*N*-Allyl-*N*-{[2.2]paracyclophan-4-yl(2-naphthyl)methyl}-4-methylbenzenesulfonamide (2k):** 54.0 mg, 48% yield, 12:1 dr, white solid, mp = 66-68 °C, new compound,  $R_f = 0.38$

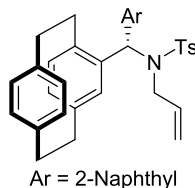

(hexanes/ethyl acetate 10/1), 98.4% ee,  $[\alpha]_D^{20} = 155.39$  ( $c$  0.87,  $\text{CHCl}_3$ ).  $^1\text{H}$  NMR (400 MHz,  $\text{CDCl}_3$ )  $\delta$  8.02-7.94 (m, 2H), 7.80-7.74 (m, 1H), 7.63 (d,  $J = 8.5$  Hz, 1H), 7.55-7.50 (m, 1H), 7.49-7.38 (m, 4H), 7.21-7.18 (m, 1H), 7.18-7.12 (m, 1H), 7.03 (dd,  $J = 8.5, 1.5$  Hz, 1H), 6.84-6.79 (m, 1H), 6.63 (d,  $J = 8.0$  Hz, 2H), 6.53 (d,  $J = 7.1$  Hz, 2H), 6.39-6.29 (m, 2H), 4.76-4.67 (m, 1H), 4.64-4.49 (m, 2H), 4.04-3.92 (m, 1H), 3.63-3.50 (m, 1H), 3.31-3.20 (m, 2H), 3.12-2.96 (m, 3H), 2.95-2.85 (m, 1H), 2.54 (s, 3H), 2.48-2.39 (m, 2H).  $^{13}\text{C}$  NMR (100 MHz,  $\text{CDCl}_3$ )  $\delta$  143.5, 140.1, 139.6, 139.2, 138.9, 138.7, 138.2, 136.9, 136.1, 134.1, 133.8, 133.0, 132.9, 132.7, 132.5, 132.3, 131.6, 130.5, 129.8, 128.5, 128.3, 128.1, 128.1, 127.7, 127.3, 126.4, 126.3, 117.4, 64.7, 48.7, 35.5, 35.4, 34.6, 21.7. HPLC: Chiracel AD-3 column, 254 nm, 30 °C, *n*-Hexane/ *i*-PrOH = 90/10, flow = 1.0 mL/min, retention time 9.0 min and 13.8 min (major). HRMS: Calculated for  $\text{C}_{37}\text{H}_{35}\text{NaNO}_2\text{S}$   $[\text{M}+\text{Na}]^+$  580.2281, found: 580.2279.

**(-)-*N*-Tosyl[2.2]paracyclophane-4-methanimine (1a):** Kinetic resolution from the addition of [2.2]paracyclophane aldimine **1a** with 2-naphthaleneboronic acid, 31.9 mg, 41% yield, 82.3% ee. HPLC: Chiralcel AD-3 column, 254 nm, 30 °C, *n*-Hexane/*i*-PrOH = 80/20, flow = 0.8 mL/min, retention time 16.3 min and 18.5 min (major).

**(+)-*N*-Allyl-*N*-{7-methyl[2.2]paracyclophan-4-yl(phenyl)methyl}-4-methylbenzenesulfonamide (2l):** 52.1 mg, 50% yield, 8:1 dr, white solid, mp = 183-185 °C, new compound,  $R_f = 0.50$

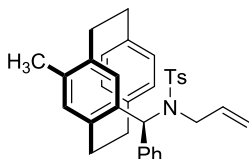

(hexanes/ethyl acetate 10/1), 97.9% ee,  $[\alpha]_D^{20} = 158.03$  ( $c$  0.52,  $\text{CHCl}_3$ ).  $^1\text{H}$  NMR (400 MHz,  $\text{CDCl}_3$ )  $\delta$  8.00-7.88 (m, 2H), 7.44-7.32 (m, 2H), 7.24-7.08 (m, 4H), 6.96-6.82 (m, 3H), 6.61 (s, 1H), 6.57-6.50 (m, 1H), 6.46-6.35 (m, 1H), 6.22 (s, 1H), 5.96 (s, 1H), 4.80-4.65 (m, 1H), 4.65-4.49 (m, 2H), 4.03-3.90 (m, 1H), 3.51-3.40 (m, 1H), 3.40-3.29 (m, 1H), 3.19 (t,  $J = 11.8$  Hz, 1H), 3.04-2.74 (m, 4H), 2.50 (s, 3H), 2.41-2.29 (m, 2H), 2.13 (s, 3H).  $^{13}\text{C}$  NMR (100 MHz,  $\text{CDCl}_3$ )  $\delta$  143.4, 141.1, 139.2, 139.0, 138.9, 138.5, 138.2, 138.1, 136.6, 134.7, 134.2, 133.9, 132.6, 131.3, 130.8, 129.7, 129.4, 128.4, 128.2, 128.0, 127.8, 117.2, 64.5, 48.4, 34.3, 34.0, 33.6, 33.4, 21.7, 19.8. HPLC: Chiralcel IB column, 254 nm, 30 °C, *n*-Hexane/*i*-PrOH = 80/20, flow = 0.8 mL/min, retention time 6.2 min (major) and 7.1 min. HRMS: Calculated for  $\text{C}_{34}\text{H}_{35}\text{NaNO}_2\text{S}$   $[\text{M}+\text{Na}]^+$  544.2281, found: 544.2262.

**(-)-*N*-Tosyl-7-methyl[2.2]paracyclophane-4-methanimine (1b):** Kinetic resolution from the addition of [2.2]paracyclophane aldimine **1b** with phenylboronic acid, 32.2 mg, 40% yield, 99.4% ee,  $[\alpha]_D^{20} = -400.28$  ( $c$  0.65,  $\text{CHCl}_3$ ). HPLC: Chiralcel AD-H column, 254 nm, 30 °C, *n*-Hexane/*i*-PrOH = 80/20, flow = 0.8 mL/min, retention time 16.7 min and 20.5 min (major).

**(+)-*N*-Allyl-*N*-{7-methyl[2.2]paracyclophan-4-yl(4-chlorophenyl)methyl}-4-methylbenzenesulfonamide (2m):** 52.3 mg, 47% yield, 17:1 dr, white solid, mp = 55-57 °C, new compound,  $R_f = 0.50$

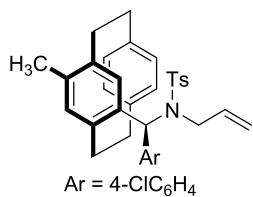

(hexanes/ethyl acetate 10/1), 97.9% ee,  $[\alpha]_D^{20} = 150.36$  ( $c$  0.54,  $\text{CHCl}_3$ ).  $^1\text{H}$  NMR (400 MHz,  $\text{CDCl}_3$ )  $\delta$  7.98-7.86 (m, 2H), 7.46-7.34 (m, 2H), 7.15-7.04 (m, 3H), 6.90-6.78 (m, 3H), 6.56 (s, 1H), 6.49 (dd,  $J = 7.8, 1.4$  Hz, 1H), 6.39 (dd,  $J = 7.8, 1.6$  Hz, 1H), 6.18 (s, 1H), 5.96 (s, 1H), 4.81-4.57 (m, 3H), 4.03-3.90 (m, 1H), 3.48-3.27 (m, 2H), 3.23-3.10 (m, 1H), 3.06-2.85 (m, 3H), 2.84-2.70 (m, 1H), 2.50 (s, 3H), 2.41-2.27 (m, 2H), 2.12 (s, 3H).  $^{13}\text{C}$  NMR (100 MHz,  $\text{CDCl}_3$ )  $\delta$  143.7, 139.7, 139.2, 138.9, 138.8, 138.6, 138.2, 138.0, 136.9, 134.1,

133.9, 133.8, 133.8, 132.6, 131.4, 130.7, 130.7, 129.8, 128.6, 128.1, 127.9, 117.5, 63.7, 48.5, 34.3, 34.1, 33.6, 33.4, 21.7, 19.8. HPLC: Chiracel IB column, 254 nm, 30 °C, *n*-Hexane/*i*-PrOH = 80/20, flow = 0.8 mL/min, retention time 6.4 min (major) and 7.5 min. HRMS: Calculated for C<sub>34</sub>H<sub>38</sub>ClN<sub>2</sub>O<sub>2</sub>S [M+NH<sub>4</sub>]<sup>+</sup> 573.2337, found: 573.2376 (<sup>35</sup>Cl), 575.2360 (<sup>37</sup>Cl).

**(-)-*N*-Tosyl-7-methyl[2.2]paracyclophane-4-methanimine (1b):** Kinetic resolution from the addition of [2.2]paracyclophane aldimine **1b** with 4-chlorophenylboronic acid, 33.8 mg, 42% yield, 99.9% ee. HPLC: Chiralcel AD-H column, 254 nm, 30 °C, *n*-Hexane/*i*-PrOH = 80/20, flow = 0.8 mL/min, retention time 16.7 min and 20.5 min (major).

**(+)-*N*-Allyl-*N*-{4-methoxy[2.2]paracyclophan-5-yl(4-chlorophenyl)methyl}-4-methylbenzenesulfonamide (2n):** 14.0 mg, 12% yield, >20:1 dr, white solid, mp = 45-47 °C, new compound,

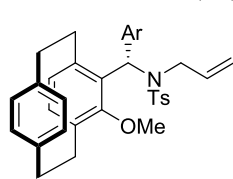

R<sub>f</sub> = 0.45 (hexanes/ethyl acetate 10/1), 99.4% ee, [α]<sub>D</sub><sup>20</sup> = 6.07 (*c* 0.28, CHCl<sub>3</sub>). <sup>1</sup>H NMR (400 MHz, CDCl<sub>3</sub>) δ 7.33-7.28 (m, 2H), 7.22-7.12 (m, 4H), 7.11-6.99 (m, 2H), 6.70-6.59 (m, 2H), 6.55-6.49 (m, 1H), 6.40-6.32 (m, 2H), 6.28-6.22 (m, 1H), 6.19-6.13 (m, 1H), 5.13-4.97 (m, 1H), 4.79-4.66 (m, 2H), 3.99-3.80 (m, 2H), 3.65-3.53 (m, 1H), 3.15-2.72 (m, 7H), 2.91 (s, 3H), 2.36 (s, 3H). <sup>13</sup>C NMR (100 MHz, CDCl<sub>3</sub>) δ 158.0, 142.8, 141.5, 139.3, 139.2, 139.0, 137.8, 135.9, 135.1, 133.2, 132.4, 132.0, 131.5, 131.2, 130.9, 129.3, 129.0, 128.7, 128.1, 127.7, 116.6, 61.9, 60.9, 49.0, 34.8, 34.7, 33.2, 31.0, 21.5. HPLC: Chiracel IA column, 254 nm, 30 °C, *n*-Hexane/*i*-PrOH = 90/10, flow = 1.0 mL/min, retention time 9.9 min (major) and 10.9 min. HRMS: Calculated for C<sub>34</sub>H<sub>34</sub>ClNNaO<sub>3</sub>S [M+Na]<sup>+</sup> 594.1840, found: 594.1851 (<sup>35</sup>Cl), 596.1824 (<sup>37</sup>Cl).

**(-)-*N*-Tosyl-4-methoxy[2.2]paracyclophane-5-methanimine (1c):** Kinetic resolution from the addition of [2.2]paracyclophane aldimine **1c** with 4-chlorophenylboronic acid, 71.0 mg, 85% yield, 13.2% ee. [α]<sub>D</sub><sup>20</sup> = -14.09 (*c* 0.44, CHCl<sub>3</sub>). HPLC: Chiralcel IA column, 254 nm, 30 °C, *n*-Hexane/*i*-PrOH = 80/20, flow = 0.8 mL/min, retention time 10.8 min (major) and 16.4 min.

## 4. Elaborations of Recovered Material and Product

### Derivatizations of the Recovered Material (*R<sub>p</sub>*)-(-)-**1a**

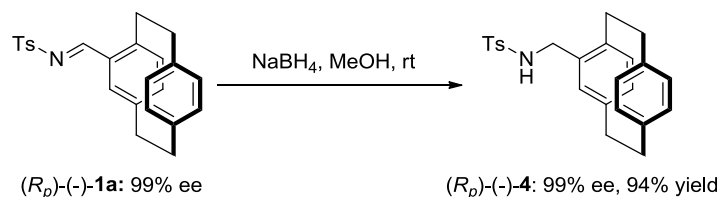

Sodium tetrahydroborate (38 mg, 1.0 mmol) was added to a solution of aldimine (-)-**1a** (78 mg, 0.20 mmol, 99% ee) in methanol (5.0 mL). The reaction was performed at room temperature overnight. The reaction mixture was quenched by addition of saturated aqueous ammonium chloride solution (15 mL). After being extracted with ethyl acetate (15 mL $\times$ 3), the combined organic layer was dried by anhydrous sodium sulfate, concentrated in *vacuo*, then purification by silica gel chromatography using hexanes and ethyl acetate as eluent to give product (-)-**4**.

(-)-*N*-([2.2]Paracyclophan-4-ylmethyl)-4-methylbenzenesulfonamide (**4**): 73 mg, 94% yield, white solid, mp = 49-51 °C, new compound,  $R_f$  = 0.50 (hexanes/ethyl acetate 3/1), 99% ee,  $[\alpha]_D^{20} = -16.48$  ( $c$  1.42, CHCl<sub>3</sub>). <sup>1</sup>H NMR (400 MHz, CDCl<sub>3</sub>)  $\delta$  7.85-7.75 (m, 2H), 7.40-7.30 (m, 2H), 6.56-6.37 (m, 5H), 6.32-6.24 (m, 1H), 6.16 (s, 1H), 4.50 (t,  $J$  = 5.7 Hz, 1H), 4.07 (dd,  $J$  = 13.4, 6.1 Hz, 1H), 3.72 (dd,  $J$  = 13.4, 5.7 Hz, 1H), 3.25-3.14 (m, 1H), 3.13-2.96 (m, 4H), 2.95-2.83 (m, 2H), 2.81-2.70 (m, 1H), 2.46 (s, 3H). <sup>13</sup>C NMR (100 MHz, CDCl<sub>3</sub>)  $\delta$  143.6, 140.4, 139.5, 139.2, 138.1, 136.7, 135.2, 135.2, 133.4, 133.4, 133.3, 132.4, 132.2, 129.9, 128.7, 127.3, 46.3, 35.3, 34.9, 34.3, 32.9, 21.7. HPLC: Chiracel AD-H column, 254 nm, 30 °C, *n*-Hexane/*i*-PrOH = 60/40, flow = 0.7 mL/min, retention time 15.9 min and 26.4 min (major). HRMS: Calculated for C<sub>24</sub>H<sub>25</sub>NaNO<sub>2</sub>S [M+Na]<sup>+</sup> 414.1498, found: 414.1502.

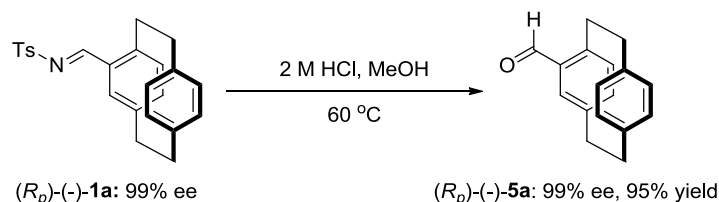

To a stirred mixture of aldimine (-)-**1a** (78 mg, 0.20 mmol, 99% ee) in methanol (10 mL) was added aqueous HCl (10 mL, 2 M in water). The resulting mixture was stirred at 60 °C for 8 h. The reaction was quenched by addition of saturated aqueous sodium bicarbonate solution (30 mL), and then extracted with dichloromethane (20 mL $\times$ 3). The combined organic layer was washed with brine, dried by anhydrous sodium sulfate and filtered. The solvent was removed in *vacuo*, and the residue was purified by column chromatography on silica gel using hexanes and ethyl acetate as eluent to afford the corresponding product (-)-**5a**.

(*R<sub>p</sub>*)-(-)-4-Formyl[2.2]paracyclophane (**5a**): 45 mg, 95% yield, white solid, known compound,<sup>[6]</sup>  $R_f$  = 0.30 (hexanes/ethyl acetate 80/1), 99% ee,  $[\alpha]_D^{20} = -181.65$  ( $c$  0.96, CHCl<sub>3</sub>), [lit.<sup>[6]</sup>:  $[\alpha]_D^{20} = 184$  ( $c$  0.41, CHCl<sub>3</sub>) for 98.7% ee (*S<sub>p</sub>*)]. <sup>1</sup>H NMR (400 MHz, CDCl<sub>3</sub>)  $\delta$  9.95 (s, 1H), 7.02 (d,  $J$  = 1.9 Hz, 1H), 6.76-6.69 (m, 1H), 6.62-6.54 (m, 2H), 6.53-6.48 (m, 1H), 6.46-6.36 (m, 2H), 4.18-4.05 (m, 1H), 3.31-2.90 (m, 7H). <sup>13</sup>C NMR (100 MHz, CDCl<sub>3</sub>)  $\delta$  192.0, 143.3, 140.8, 139.6, 139.5, 138.2, 136.7, 136.4, 136.2, 133.4, 133.0, 132.5, 132.3, 35.4, 35.2, 35.1, 33.7. HPLC: Chiracel IC column, 254 nm, 30 °C, *n*-Hexane/*i*-PrOH = 90/10, flow = 0.7 mL/min, retention time 12.6 min (major) and 15.4 min.

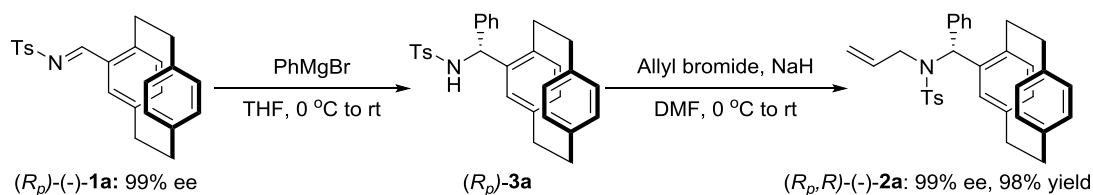

To a solution of  $(-)\text{-1a}$  (78 mg, 0.20 mmol, 99% ee) in dry tetrahydrofuran (7.0 mL) was added PhMgBr (0.50 mL, 2 M in THF, 1.0 mmol) at 0 °C under nitrogen. The reaction mixture was allowed to warm to room temperature and stirred at room temperature overnight. Water (5.0 mL) was added, and extracted with ethyl acetate (10 mL $\times$ 3). The combined organic layer was washed with brine, dried by anhydrous sodium sulfate and filtered. The solvent was removed in *vacuo*, and the residue was purified by column chromatography on silica gel using hexanes and ethyl acetate as eluent to afford sulfonamide **3a**.

To a solution of the above sulfonamide **3a** in dry *N,N*-dimethylformamide (5.0 mL) was added sodium hydride (24 mg, 1.0 mmol, 60% wt.) at 0 °C, and then allyl bromide (121 mg, 86.0  $\mu$ L, 1.00 mmol) was added dropwise. The reaction mixture was warmed to room temperature and stirred at room temperature overnight. Water (10 mL) was added, and extracted with ethyl acetate (10 mL $\times$ 3). The combined organic layer was washed with brine, dried by anhydrous sodium sulfate and filtered. The solvent was removed in *vacuo*, and the residue was purified by column chromatography on silica gel using hexanes and ethyl acetate as eluent to afford the desirable product  $(-)\text{-2a}$ .

**$(-)\text{-N}$ -Allyl- $N$ -{[2.2]paracyclophan-4-yl(phenyl)methyl}-4-methylbenzenesulfonamide (**2a**):** 99 mg, 98% yield, white solid, new compound,  $R_f$  = 0.50 (hexanes/ethyl acetate 10/1), 99% ee,  $[\alpha]_D^{20} = -129.07$  ( $c$  1.37,  $\text{CHCl}_3$ ).  $^1\text{H NMR}$  (400 MHz,  $\text{CDCl}_3$ )  $\delta$  7.97-7.89 (m, 2H), 7.43-7.33 (m, 2H), 7.24-7.17 (m, 1H), 7.17-7.07 (m, 3H), 6.91-6.84 (m, 2H), 6.77-6.70 (m, 1H), 6.63-6.47 (m, 4H), 6.34 (d,  $J$  = 7.6 Hz, 1H), 6.20 (s, 1H), 4.80-4.68 (m, 1H), 4.64-4.48 (m, 2H), 4.04-3.91 (m, 1H), 3.53-3.39 (m, 1H), 3.30-3.15 (m, 2H), 3.08-2.86 (m, 4H), 2.53-2.37 (m, 2H), 2.50 (s, 3H).  $^{13}\text{C NMR}$  (100 MHz,  $\text{CDCl}_3$ )  $\delta$  143.5, 140.9, 140.0, 139.5, 139.2, 138.9, 138.6, 136.9, 136.0, 134.0, 133.7, 132.7, 132.3, 132.2, 131.4, 130.5, 129.7, 129.4, 128.4, 128.2, 128.0, 117.2, 64.6, 48.5, 35.5, 35.4, 34.6, 34.5, 21.7. HPLC: Chiracel AD-H column, 254 nm, 30 °C, *n*-Hexane/*i*-PrOH = 90/10, flow = 1.0 mL/min, retention time 6.8 min and 7.4 min (major).

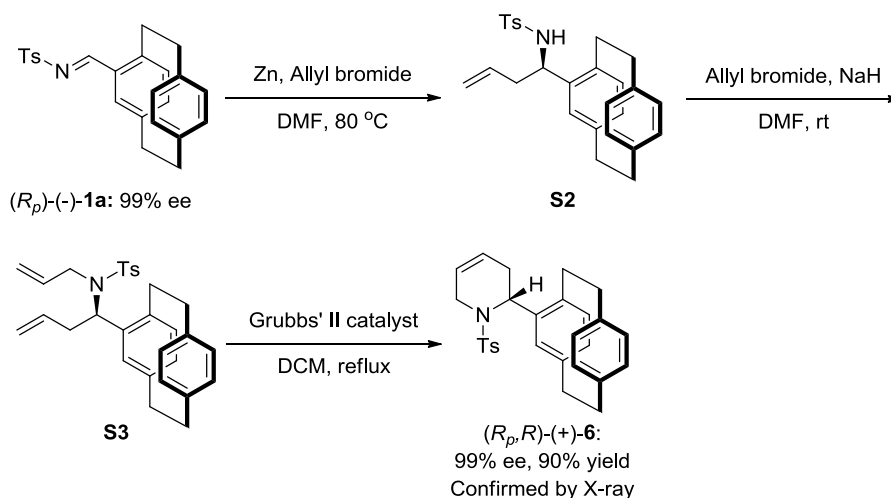

To a suspension of (-)-**1a** (78 mg, 0.20 mmol, 99% ee) and zinc powder (24 mg, 0.36 mmol) in dry *N,N*-dimethylformamide (4.0 mL) was slowly added allyl bromide (36 mg, 26.0  $\mu$ L, 0.30 mmol) under nitrogen and the solution was stirred at 80 °C for 4 h. After the addition of saturated aqueous ammonium chloride solution (15 mL), the solution was extracted with ethyl acetate (15 mL $\times$ 3). The combined organic layer was washed by brine, dried by anhydrous sodium sulfate and filtered. The solvent was removed in *vacuo*, and the residue was purified by column chromatography on silica gel using hexanes and ethyl acetate as eluent to afford sulfonamide **S2**.

To a solution of the above sulfonamide **S2** in dry *N,N*-dimethylformamide (2.0 mL) was added sodium hydride (30 mg, 0.75 mmol, 60% wt.) at room temperature, and then allyl bromide (73 mg, 50.0  $\mu$ L, 0.60 mmol) was added dropwise. The reaction mixture was stirred at room temperature overnight. Water (10 mL) was added, and extracted with ethyl acetate (15 mL $\times$ 3). The combined organic layer was washed with brine, dried by anhydrous sodium sulfate and filtered. The solvent was removed in *vacuo*, and the residue was purified by column chromatography on silica gel using hexanes and ethyl acetate as eluent to afford the compound **S3**.

To a solution of crude product **S3** in dichloromethane (5.0 mL) was added Grubb's second generation catalyst (17 mg, 0.02 mmol, 10 mol%). The mixture was refluxed overnight and concentrated. The resulting crude product was purified by column chromatography on silica gel using hexanes and ethyl acetate as eluent to afford the desirable product (*R<sub>p</sub>,R*)-(+)-**6**.

(+)-2-([2.2]Paracyclophan-4-yl)-1-tosyl-1,2,3,6-tetrahydropyridine (**6**): 80 mg, 90% yield, white solid, mp = 149-151 °C, new compound,  $R_f$  = 0.30 (hexanes/ethyl acetate 10/1), 99% ee,  $[\alpha]_D^{20} = 73.22$  (*c* 0.62, CHCl<sub>3</sub>). <sup>1</sup>H NMR (400 MHz, CDCl<sub>3</sub>)  $\delta$  7.94-7.82 (m, 2H), 7.41-7.32 (m, 2H), 7.12-7.01 (m, 1H), 6.64 (s, 1H), 6.63-6.54 (m, 2H), 6.54-6.48 (m, 1H), 6.45-6.37 (m, 2H), 5.48-5.34 (m, 3H), 4.23-3.91 (m, 2H), 3.35-3.23 (m, 2H), 3.22-2.93 (m, 6H), 2.51-2.34 (m, 1H), 2.46 (s, 3H), 2.26-2.14 (m, 1H). <sup>13</sup>C NMR (100 MHz, CDCl<sub>3</sub>)  $\delta$  143.4, 140.0, 139.9, 139.5, 139.0, 137.8, 136.0, 136.0, 133.4, 132.5, 132.3, 131.1, 129.9, 129.7, 127.1, 123.2, 122.1, 52.2, 42.1, 35.3, 34.9, 33.8, 31.2, 21.6. HPLC: Chiracel AD-H column, 254 nm, 30 °C, *n*-Hexane/*i*-PrOH = 90/10, flow = 1.0 mL/min, retention time 13.4 min (major) and 14.2 min. HRMS: Calculated for C<sub>28</sub>H<sub>30</sub>NO<sub>2</sub>S [M+H]<sup>+</sup> 444.1992, found: 444.1971.

#### Removal of the Tosyl Group

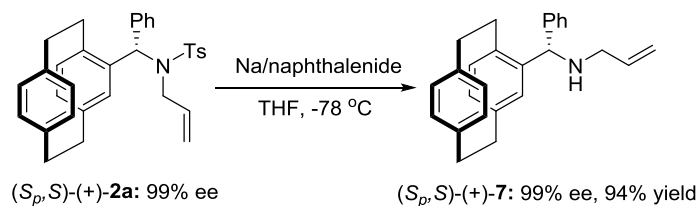

Sodium (92 mg, 4.0 mmol, 20 equiv; washed free of oil in hexane) was added to a vigorously stirred suspension of naphthalene (513 mg, 4.00 mmol) in tetrahydrofuran (15 mL) at room temperature. The resulting green suspension was stirred for 4 h at room temperature, then was transferred to a solution of (*S<sub>p</sub>,S*)-(+)-**2a** (101 mg, 0.20 mmol) in tetrahydrofuran (10 mL) at -78 °C. The dark green solution was stirred at -78 °C for 2 h. Water (20 mL) was added to the solution at -78 °C. The reaction mixture was extracted with ethyl acetate (20 mL $\times$ 3). The combined organic layer was washed with brine, dried by anhydrous sodium sulfate and filtered. The solvent was removed in *vacuo*, and the residue was purified by column chromatography on silica gel using hexanes and ethyl acetate as eluent to afford the desirable product (+)-**7**.

(+)-*N*-([2.2]Paracyclophan-4-yl(phenyl)methyl)prop-2-en-1-amine (**7**): 67 mg, 94% yield, white solid, mp = 99-101 °C, new compound,  $R_f = 0.35$  (hexanes/ethyl acetate 10/1), 99% ee,  $[\alpha]_D^{20} = 174.32$  ( $c$  0.30,  $\text{CHCl}_3$ ).  $^1\text{H NMR}$  (400 MHz,  $\text{CDCl}_3$ )  $\delta$  7.25-7.19 (m, 2H), 7.18-7.12 (m, 3H), 6.88 (s, 1H), 6.67-6.60 (m, 1H), 6.60-6.49 (m, 3H), 6.48-6.42 (m, 1H), 6.35 (d,  $J = 7.6$  Hz, 1H), 6.19-6.05 (m, 1H), 5.42-5.23 (m, 2H), 4.76 (s, 1H), 3.41-3.02 (m, 9H), 2.77-2.63 (m, 1H).  $^{13}\text{C NMR}$  (100 MHz,  $\text{CDCl}_3$ )  $\delta$  143.9, 142.9, 140.1, 139.8, 139.6, 137.2, 136.6, 135.7, 133.8, 133.1, 132.0, 131.5, 129.7, 129.3, 128.4, 128.1, 126.9, 116.6, 62.9, 50.4, 35.5, 35.4, 34.6, 34.1. HPLC: Chiracel IA column, 254 nm, 30 °C, *n*-Hexane/*i*-PrOH = 98/2, flow = 1.0 mL/min, retention time 5.0 min (major) and 5.7 min. HRMS: Calculated for  $\text{C}_{26}\text{H}_{28}\text{N}$   $[\text{M}+\text{H}]^+$  354.2216, found: 354.2213.

## 5. Scale-up Reaction

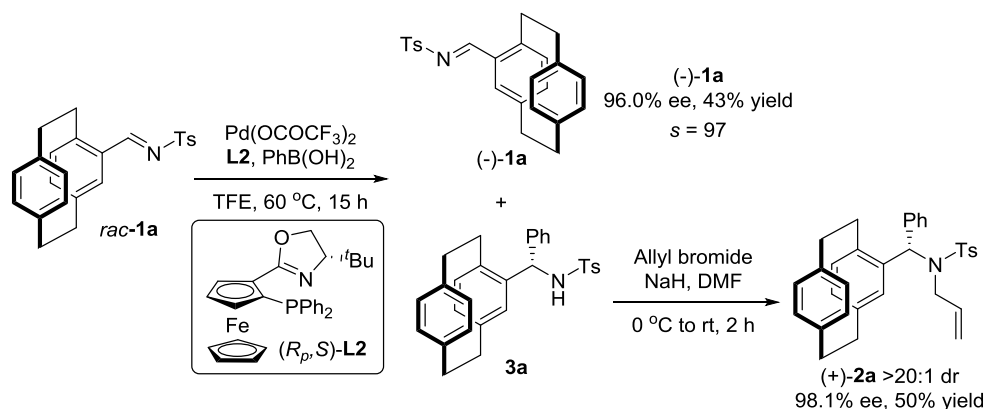

A schlenk tube (50 mL) was charged with  $\text{Pd}(\text{OCOCF}_3)_2$  (16.6 mg, 0.05 mmol, 5 mol%) and (*R<sub>p</sub>,S*)-**L2** (24.8 mg, 0.05 mmol, 5 mol%) under nitrogen, and degassed anhydrous acetone (5.0 mL) was added. The mixture was stirred at room temperature for 1 h. The solvent was removed under vacuum to give the catalyst. Then substrate *rac*-**1a** (389 mg, 1.00 mmol), phenylboronic acid (122 mg, 1.0 mmol) and 2,2,2-trifluoroethanol (20 mL) were added into the tube under nitrogen. The mixture was heated to 60 °C. After stirring at 60 °C for 15 h, the reaction mixture was cooled to room temperature, and the solvent was removed by rotary evaporation. The resulting mixture was dried under vacuum and the conversion of *rac*-**1a** (51% conv.) was confirmed by  $^1\text{H NMR}$  analysis with benzyl ether as internal standard. The solvent was removed in *vacuo*, recovered material (-)-**1a** (165.5 mg, 43% yield with 96.0% ee) and addition product **3a** were isolated by column chromatography on silica gel using hexanes and ethyl acetate as eluent.

To a solution of the addition product **3a** in dry *N,N*-dimethylformamide (DMF, 8.0 mL) was added sodium hydride (48 mg, 1.20 mmol, 60% wt.) at 0 °C, and then allyl bromide (242 mg, 0.17 mL, 2.00 mmol) was added dropwise. The reaction mixture was warmed to room temperature and stirred at room temperature for 4 h. Water (10 mL) was added, and extracted with ethyl acetate (15 mL × 3). The combined organic layer was washed with brine, dried by anhydrous sodium sulfate and filtered, concentrated in *vacuo* and analyzed by crude  $^1\text{H NMR}$  to determine diastereomeric ratio (> 20:1 dr). The solvent was removed in *vacuo*, and the residue was purified by column chromatography on silica gel using hexanes and ethyl acetate as eluent to afford the product (+)-**2a** (255.0 mg, 50% yield with 98.1% ee).

## 6. Determination of Absolute Configuration

### 6.1 Determination of the Absolute Configuration of (+)-2a

To determine the absolute configuration of (+)-**2a**, a single crystal of the **2a** was grown from its solution in dichloromethane and *n*-hexane. *n*-Hexane (3.0 mL) was slowly added into the solution of **2a** in dichloromethane (3.0 mL) at room temperature, then the solvent was slowly evaporated and single crystal was obtained after 6 days. The structure in **Figure S1** showed the absolute configuration of (+)-**2a** is ( $S_p,S$ ). The CCDC number is 1891926. These details can be obtained free of charge *via* [www.ccdc.com.ac.uk/data\\_request/cif](http://www.ccdc.com.ac.uk/data_request/cif) from the Cambridge Crystallographic Data Centre.

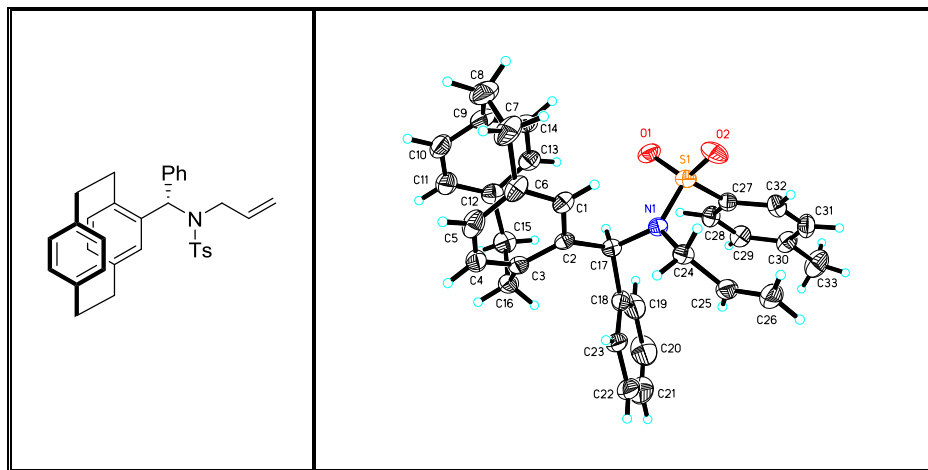

**Figure S1.** X-ray Crystallographic Analysis of ( $S_p,S$ )-**2a**

### 6.2 Determination of the Absolute Configuration of (+)-2l

To determine the absolute configuration of (+)-**2l**, a single crystal of the **2l** was grown from its solution in dichloromethane and *n*-hexane. *n*-Hexane (1.5 mL) was slowly added into the solution of **2l** in dichloromethane (1.5 mL) at room temperature, then the solvent was slowly evaporated and single crystal was obtained after 3 days. The structure in **Figure S2** showed the absolute configuration of (+)-**2l** is ( $S_p,S$ ). The CCDC number is 1910494. These details can be obtained free of charge *via* [www.ccdc.com.ac.uk/data\\_request/cif](http://www.ccdc.com.ac.uk/data_request/cif) from the Cambridge Crystallographic Data Centre.

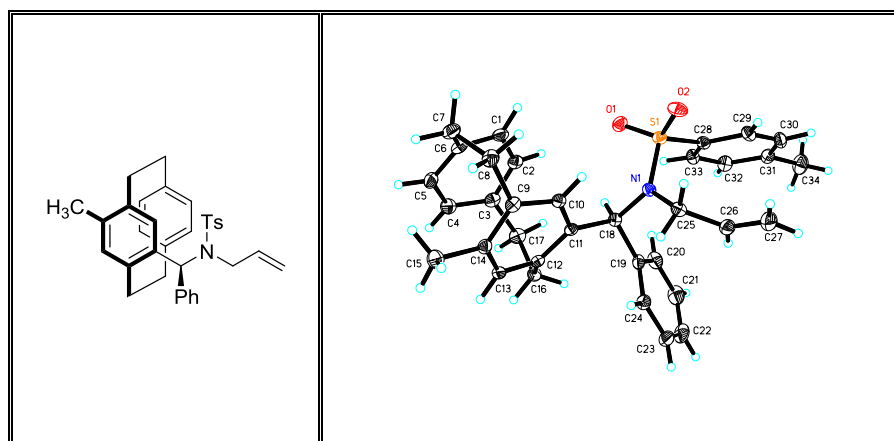

**Figure S2.** X-ray Crystallographic Analysis of ( $S_p,S$ )-**2l**

### 6.3 Determination of the Absolute Configuration of (+)-**6**

To determine the absolute configuration of (+)-**6**, a single crystal of the **6** was grown from its solution in dichloromethane and *n*-hexane. *n*-Hexane (3.0 mL) was slowly added into the solution of **6** in dichloromethane (3.0 mL) at room temperature, then the solvent was slowly evaporated and single crystal was obtained after 5 days. The structure in **Figure S3** showed the absolute configuration of (+)-**6** is ( $R_p,R$ ). The CCDC number is 1917426. These details can be obtained free of charge *via* [www.ccdc.com.ac.uk/data\\_request/cif](http://www.ccdc.com.ac.uk/data_request/cif) from the Cambridge Crystallographic Data Centre.

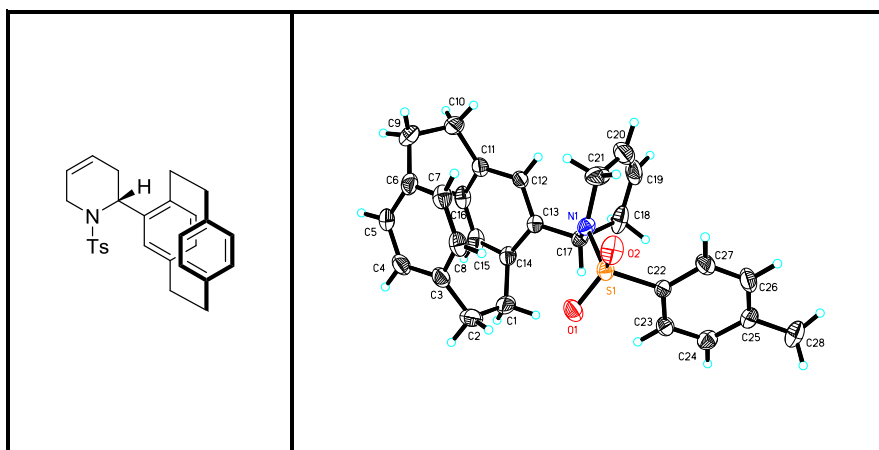

**Figure S3.** X-ray Crystallographic Analysis of ( $R_p,R$ )-**6**



## 7. References

1. Love, B. E.; Raje, P. S.; Williams II, T. C. Preparation of *N*-Tosylaldimines. *Synlett* **1994**, 493.
2. Friedmann, C. J.; Ay, S.; Bräse, S. Improved Synthesis of Enantiopure 4-Hydroxy[2.2]paracyclophane. *J. Org. Chem.* **2010**, *75*, 4612.
3. Gready, J. E.; Hambley, T. W.; Kakiuchi, K.; Kobiros, K.; Sternhell, S.; Tansey, C. W.; Tobe, Y. NMR Studies of Bond Order in Distorted Aromatic Systems. *J. Am. Chem. Soc.* **1990**, *112*, 7537.
4. (a) Ernst, L.; Eltamany, S.; Hopf, H. Deuterium Isotope Effects on Carbon-13 Chemical Shifts in Cyclophanes. Deshielding Intrinsic Through-Space and Through-Bond Effects. *J. Am. Chem. Soc.* **1982**, *104*, 299. (b) Yang, Z.; Kovač, B.; Heilbronner, E.; Eltamany, S.; Hopf, H. Ionization Energies of Methyl-substituted [2.2]Paracyclophanes. *Helv. Chim. Acta* **1981**, *64*, 1991.
5. Jayasundera, K. P.; Kusmus, D. N. M.; Deuilhé, L.; Etheridge, L.; Farrow, Z.; Lun, D. J.; Kaur, G.; Rowlands, G. J. The synthesis of substituted amino[2.2]paracyclophanes. *Org. Biomol. Chem.* **2016**, *14*, 10848.
6. Sergeeva, E. V.; Shuklov, I. A.; Antonov, D. Y.; Vorontsova, N. V.; Vorontsov, E. V.; Starikova, Z. A.; Il'in, M. M.; Rozenberg, V. I. Resolution Approaches to Enantiomers of 4-Formyl[2.2]paracyclophane. *Tetrahedron: Asymmetry* **2010**, *21*, 1004.

## 8. Copy of NMR, HPLC for Compounds

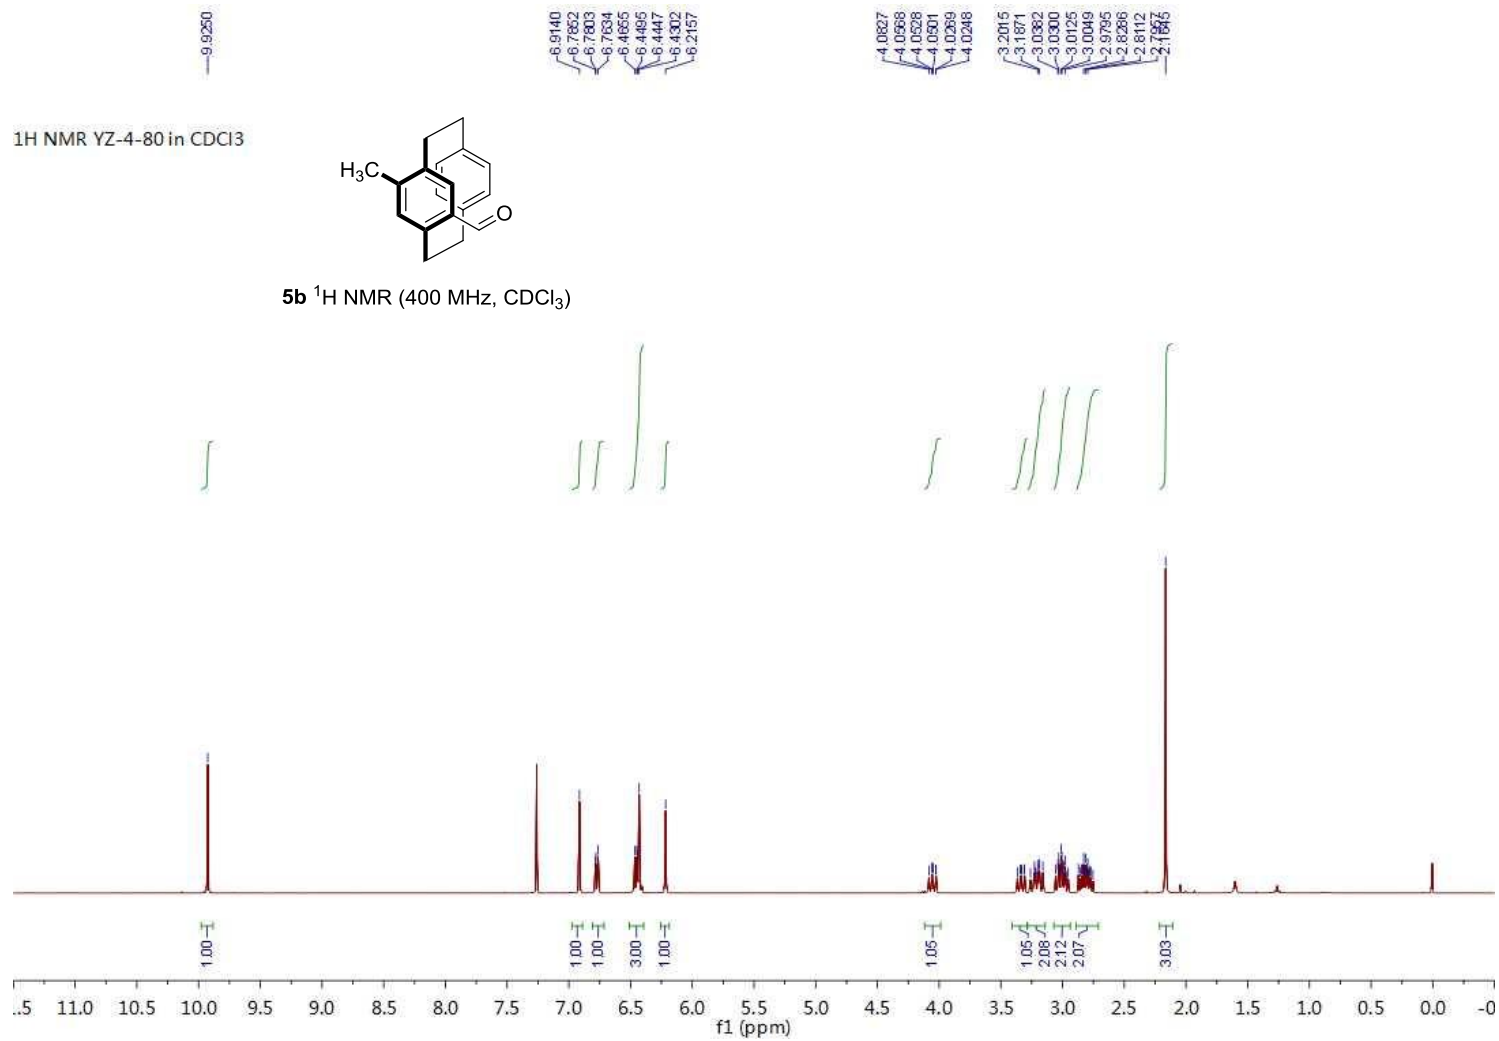

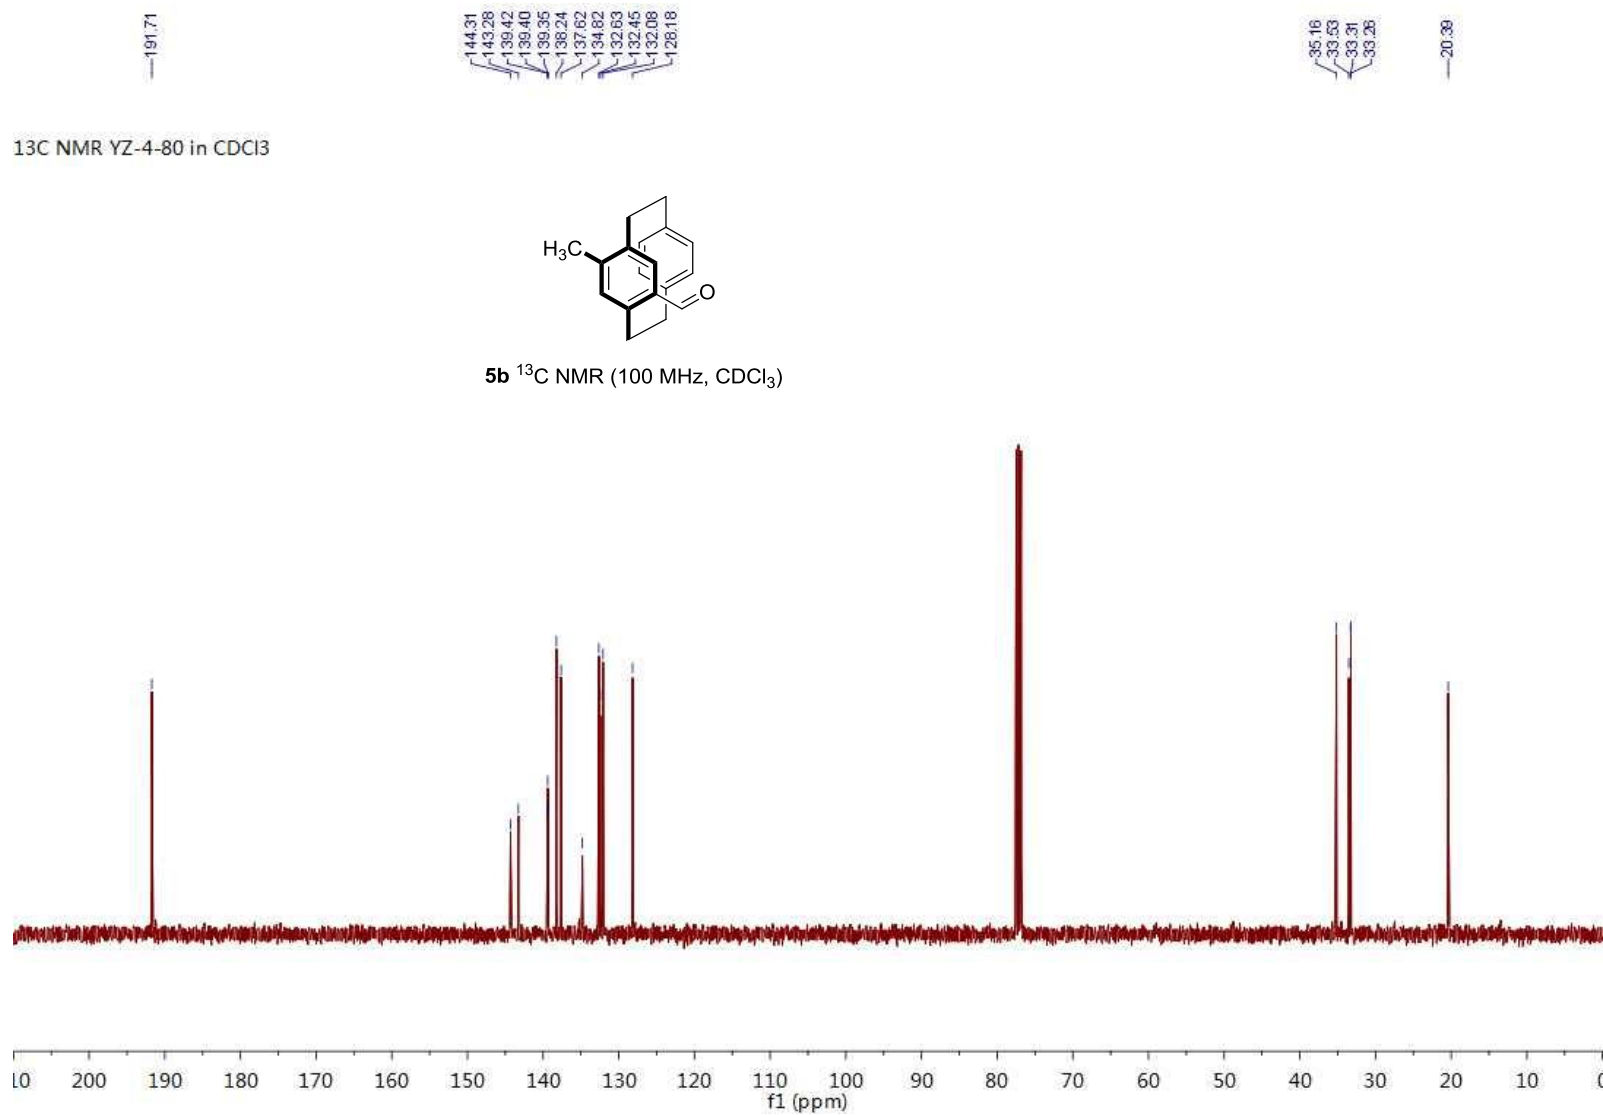

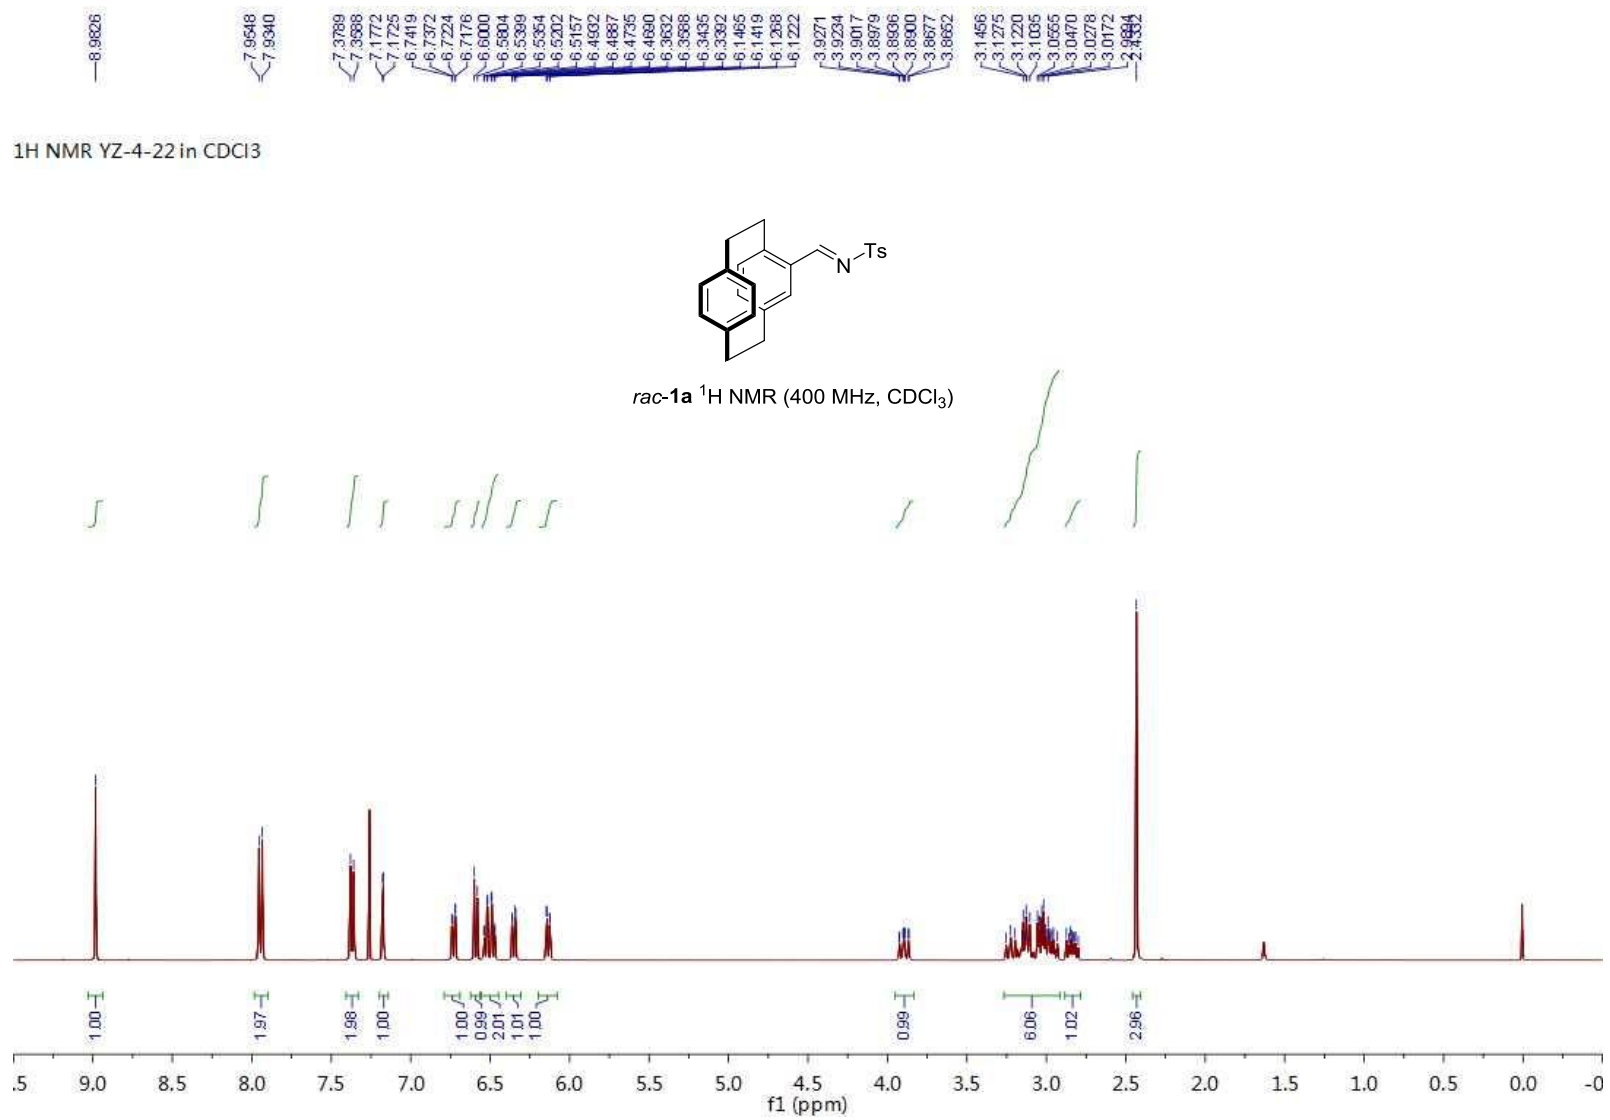

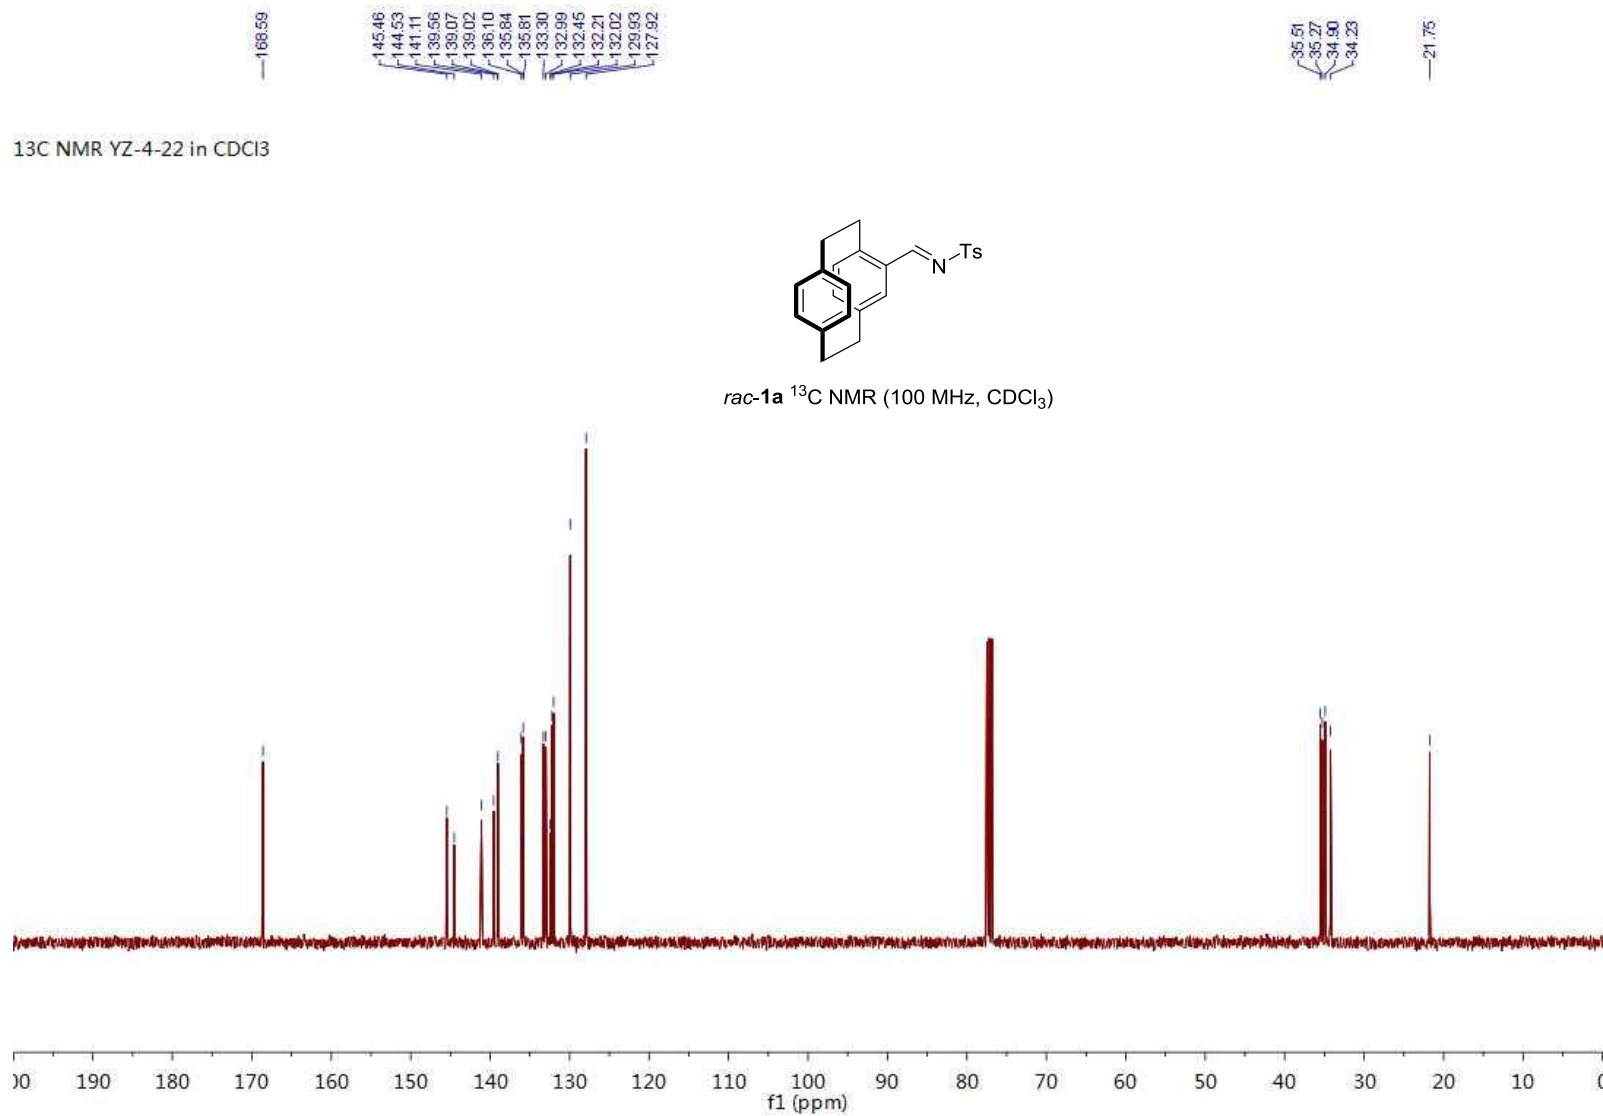

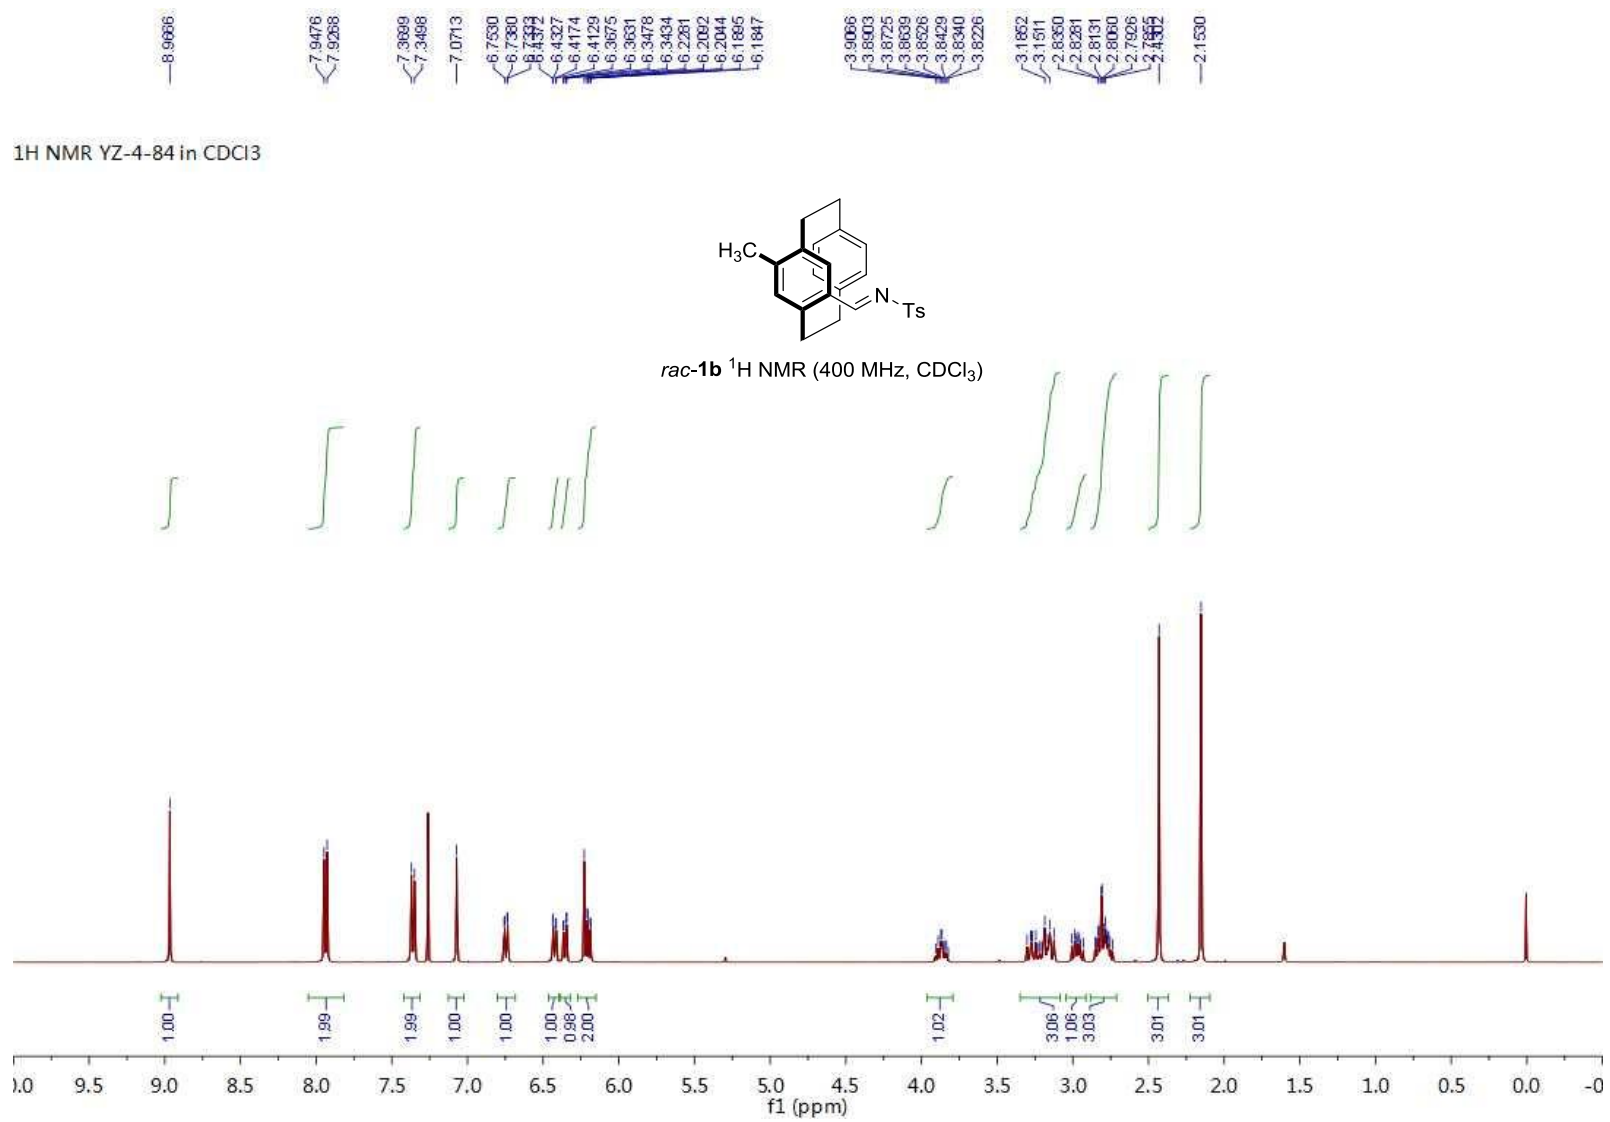

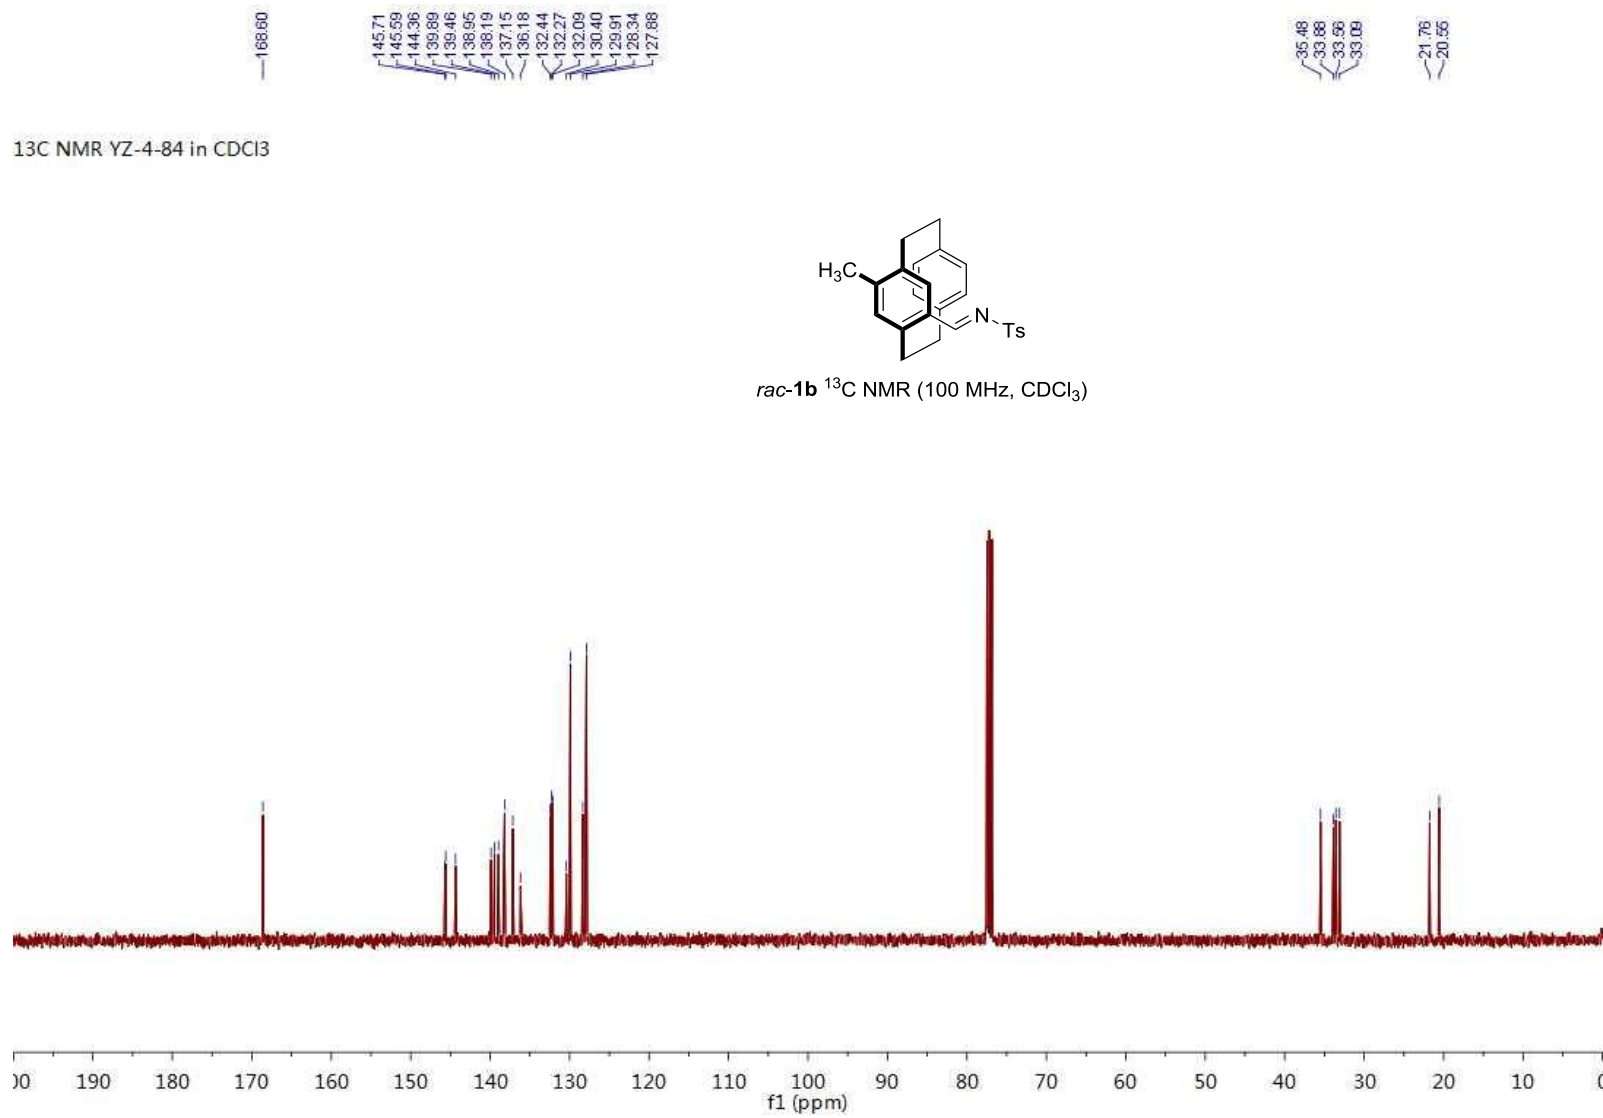

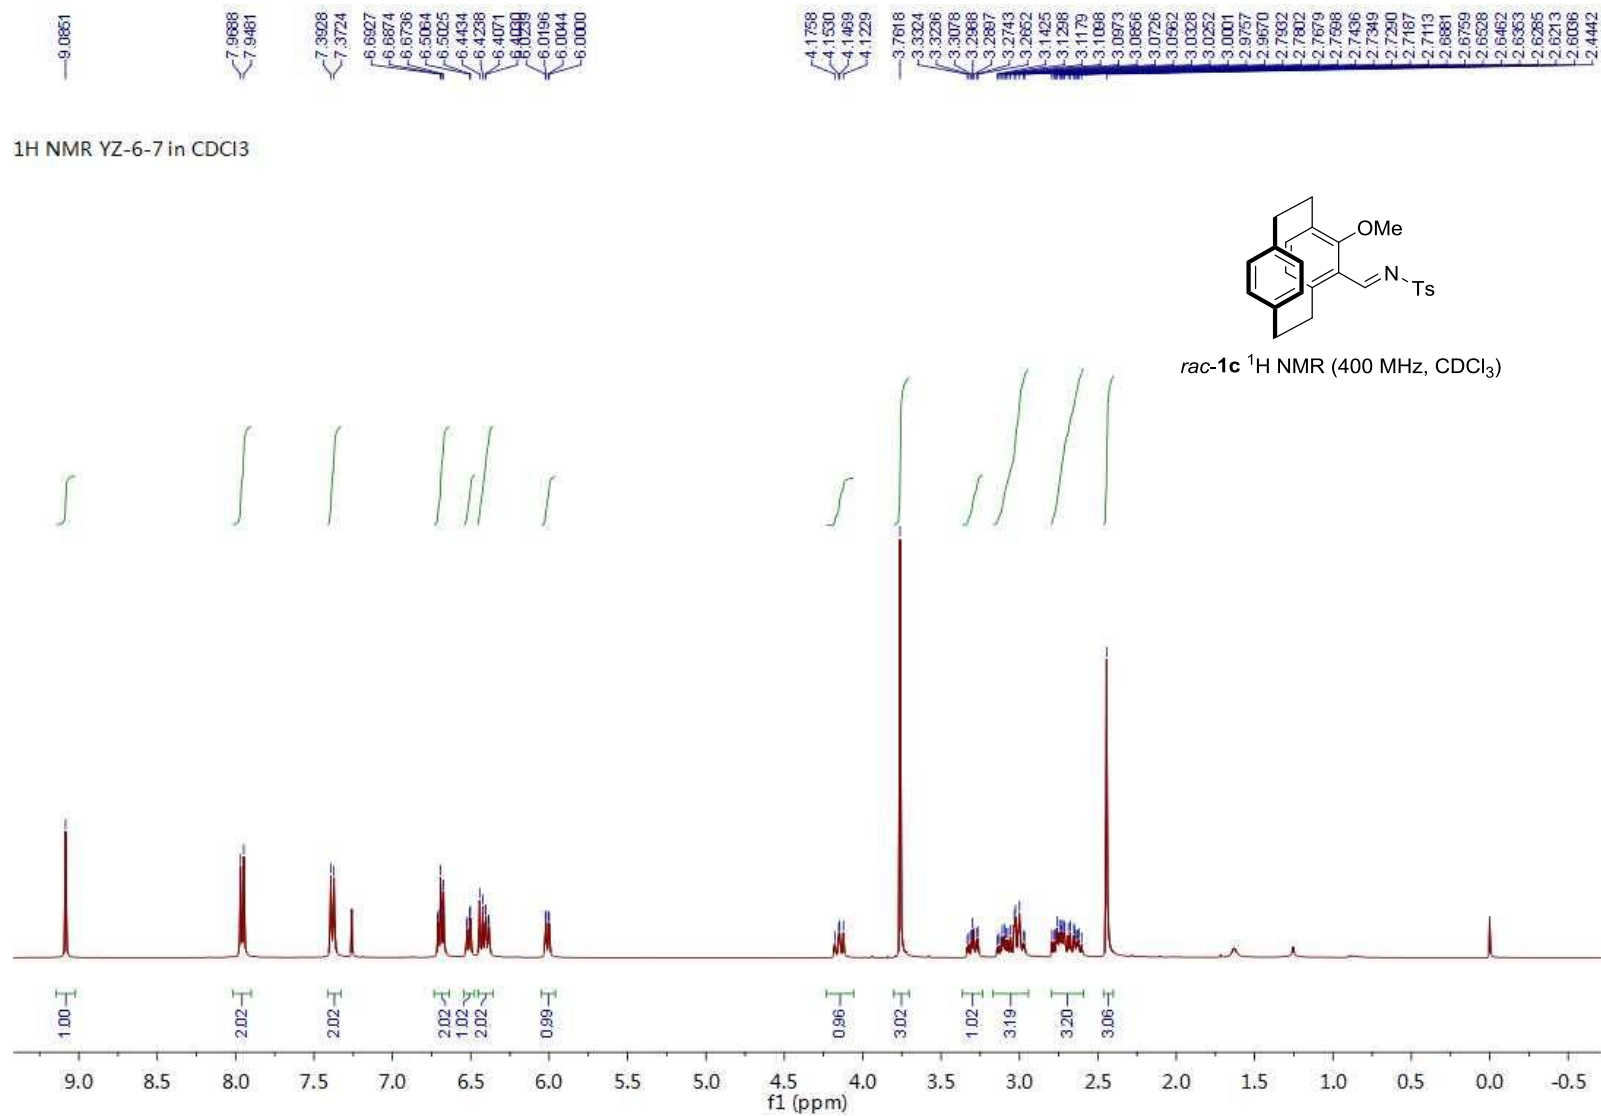



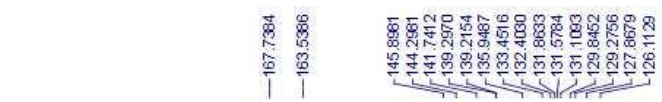

13C NMR YZ-6-7 in CDCl3

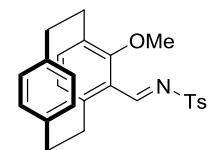

*rac-1c* <sup>13</sup>C NMR (100 MHz, CDCl<sub>3</sub>)

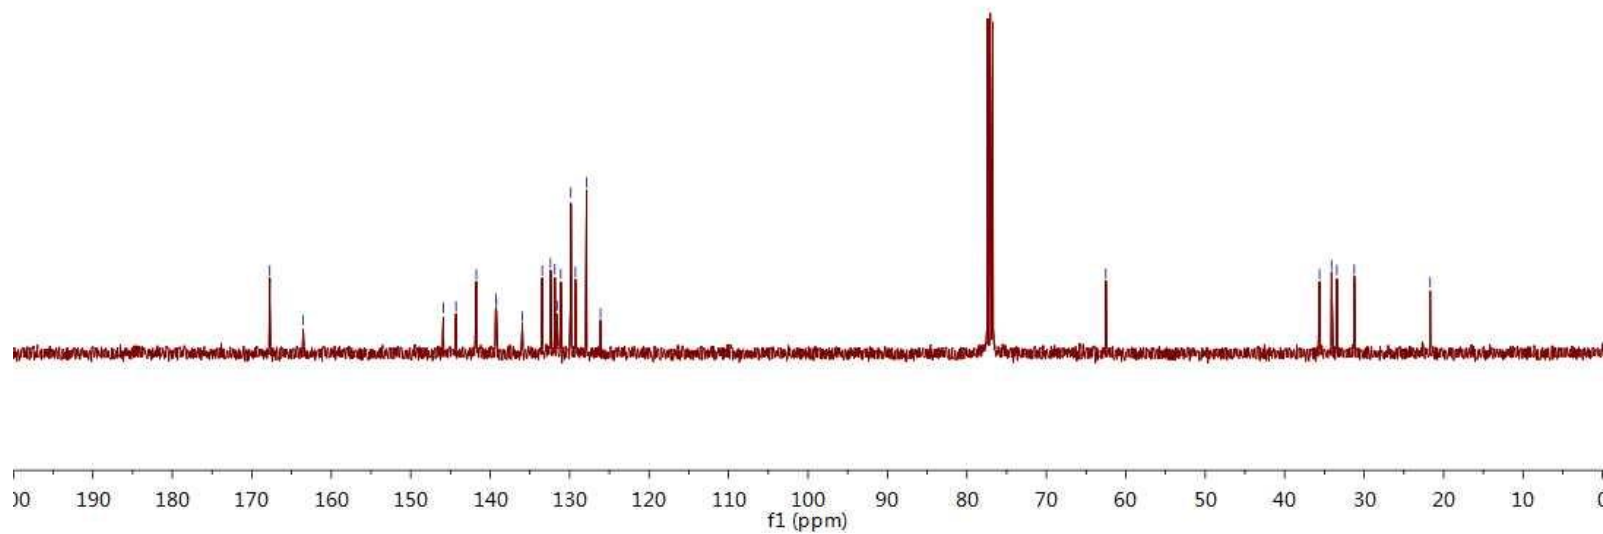

7.9496  
7.9294  
7.3952  
7.3751  
7.3074  
7.1862  
7.1496  
7.1304  
7.1122  
6.8866  
6.8674  
6.7314  
6.6025  
6.5965  
6.5681  
6.5686  
6.5414  
6.5373  
6.4841  
6.3484  
6.3294  
6.2044  
4.7564  
4.7503  
4.7209  
4.7117  
4.6174  
4.6015  
4.5923  
4.5820  
4.5711  
4.5695  
3.8864  
3.9795  
3.9561  
3.9390  
3.2165  
3.2049  
3.1930  
3.0246  
3.0201  
3.0066  
2.9909  
2.9814  
2.5005  
2.4733  
2.4658  
2.4563  
2.4504  
2.4419  
2.4319

<sup>1</sup>H NMR YZ-4-58B major in CDCl<sub>3</sub>

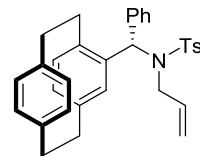

(+)-**2a** <sup>1</sup>H NMR (400 MHz, CDCl<sub>3</sub>)

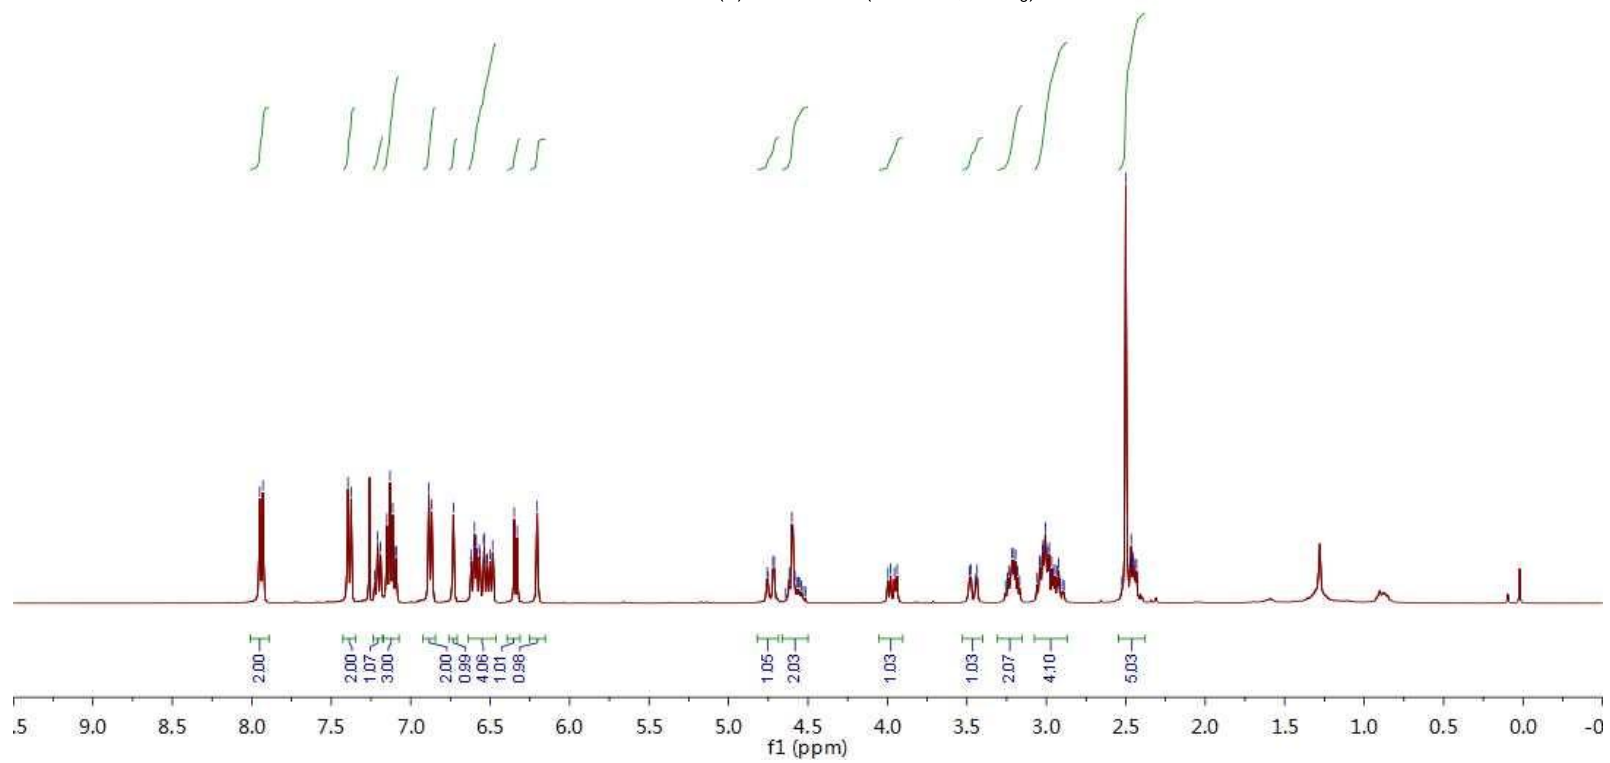

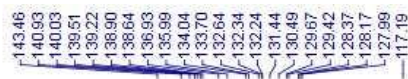

64.63

48.47

35.46

35.41

34.57

34.49

21.70

$^{13}\text{C}$  NMR YZ-4-58B major in  $\text{CDCl}_3$

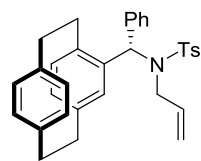

(+)-**2a**  $^{13}\text{C}$  NMR (100 MHz,  $\text{CDCl}_3$ )

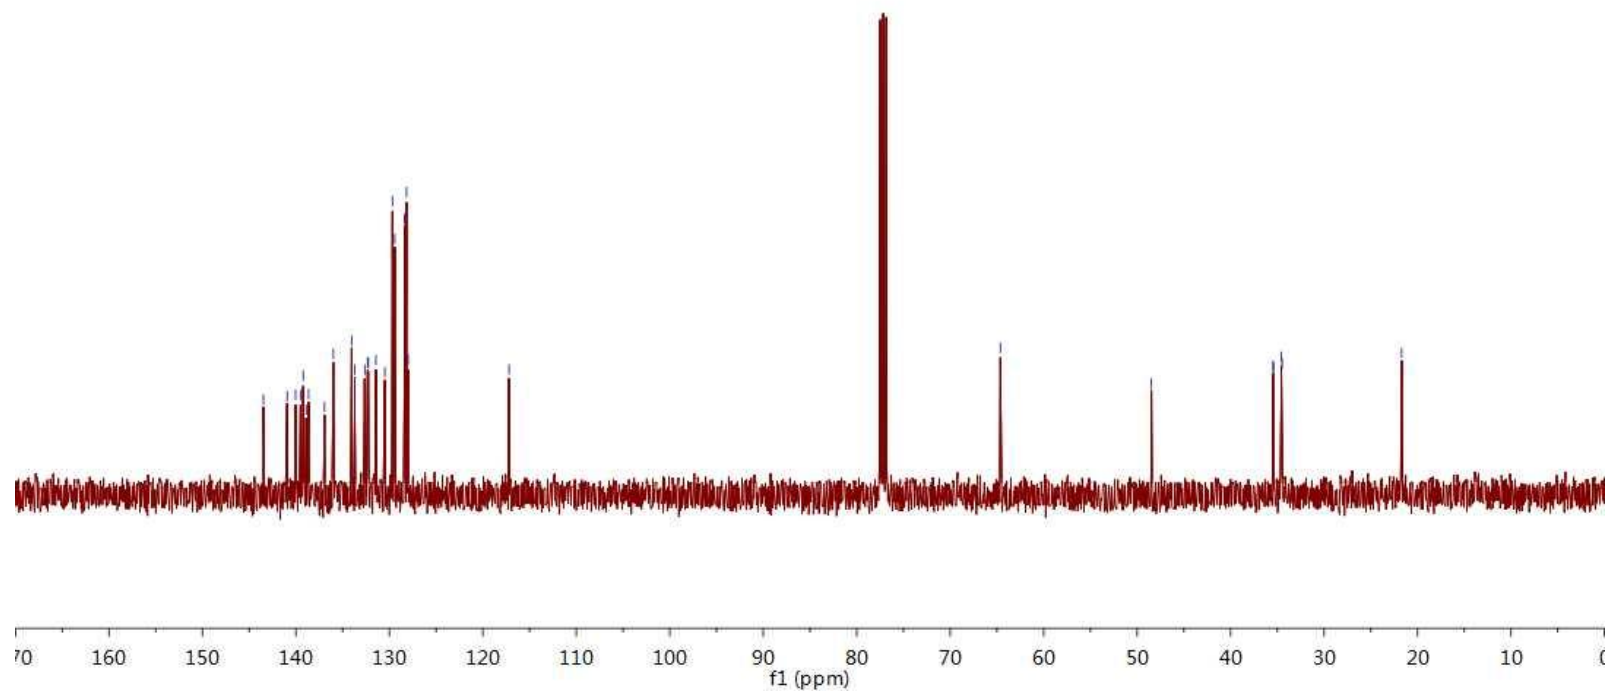

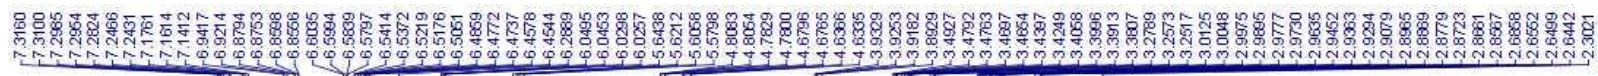

1H NMR YZ-4-58BTM minor in CDCl<sub>3</sub>

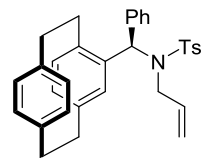

2a' <sup>1</sup>H NMR (400 MHz, CDCl<sub>3</sub>)

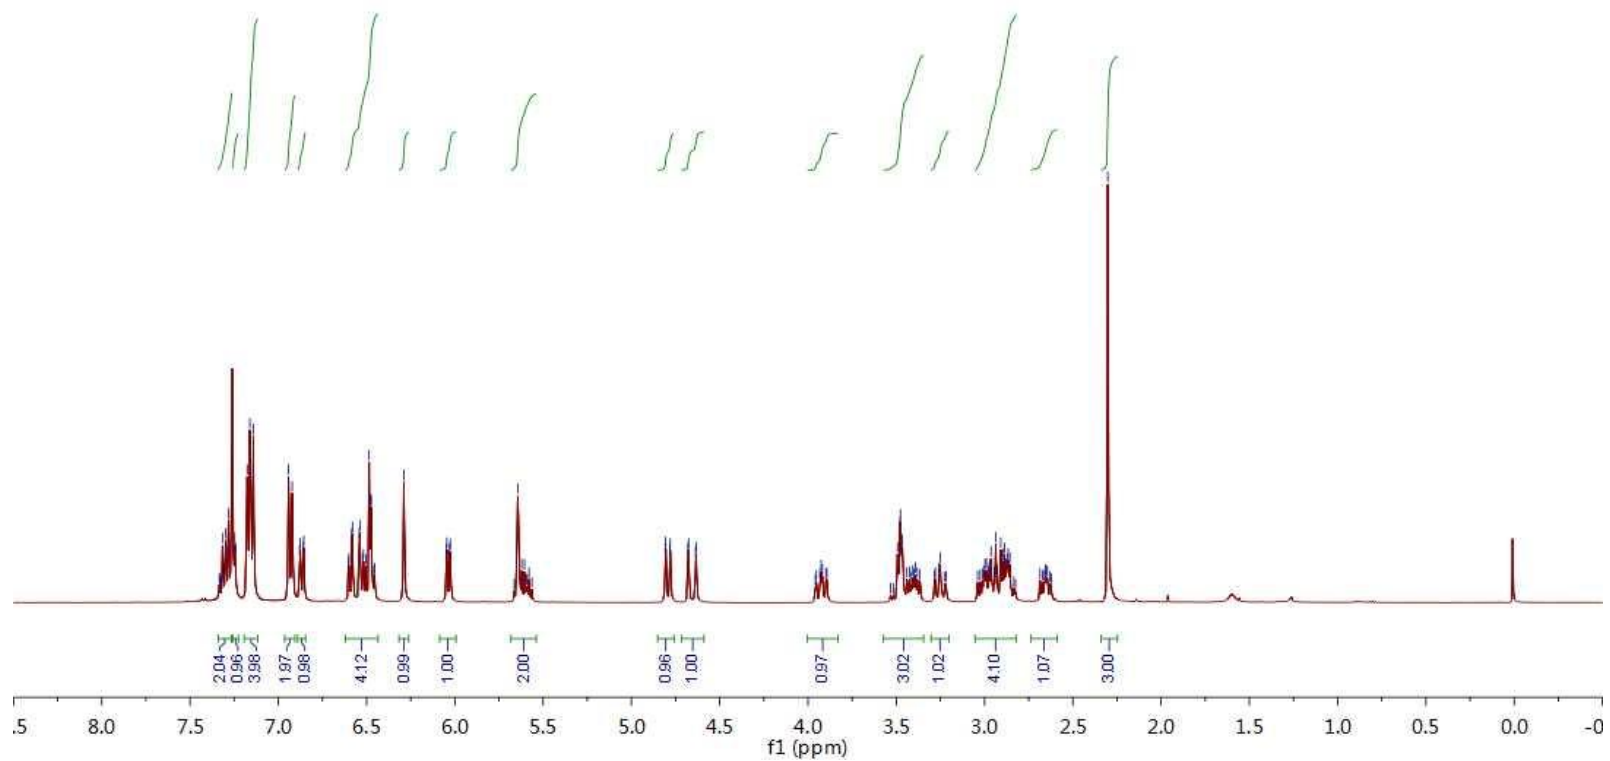

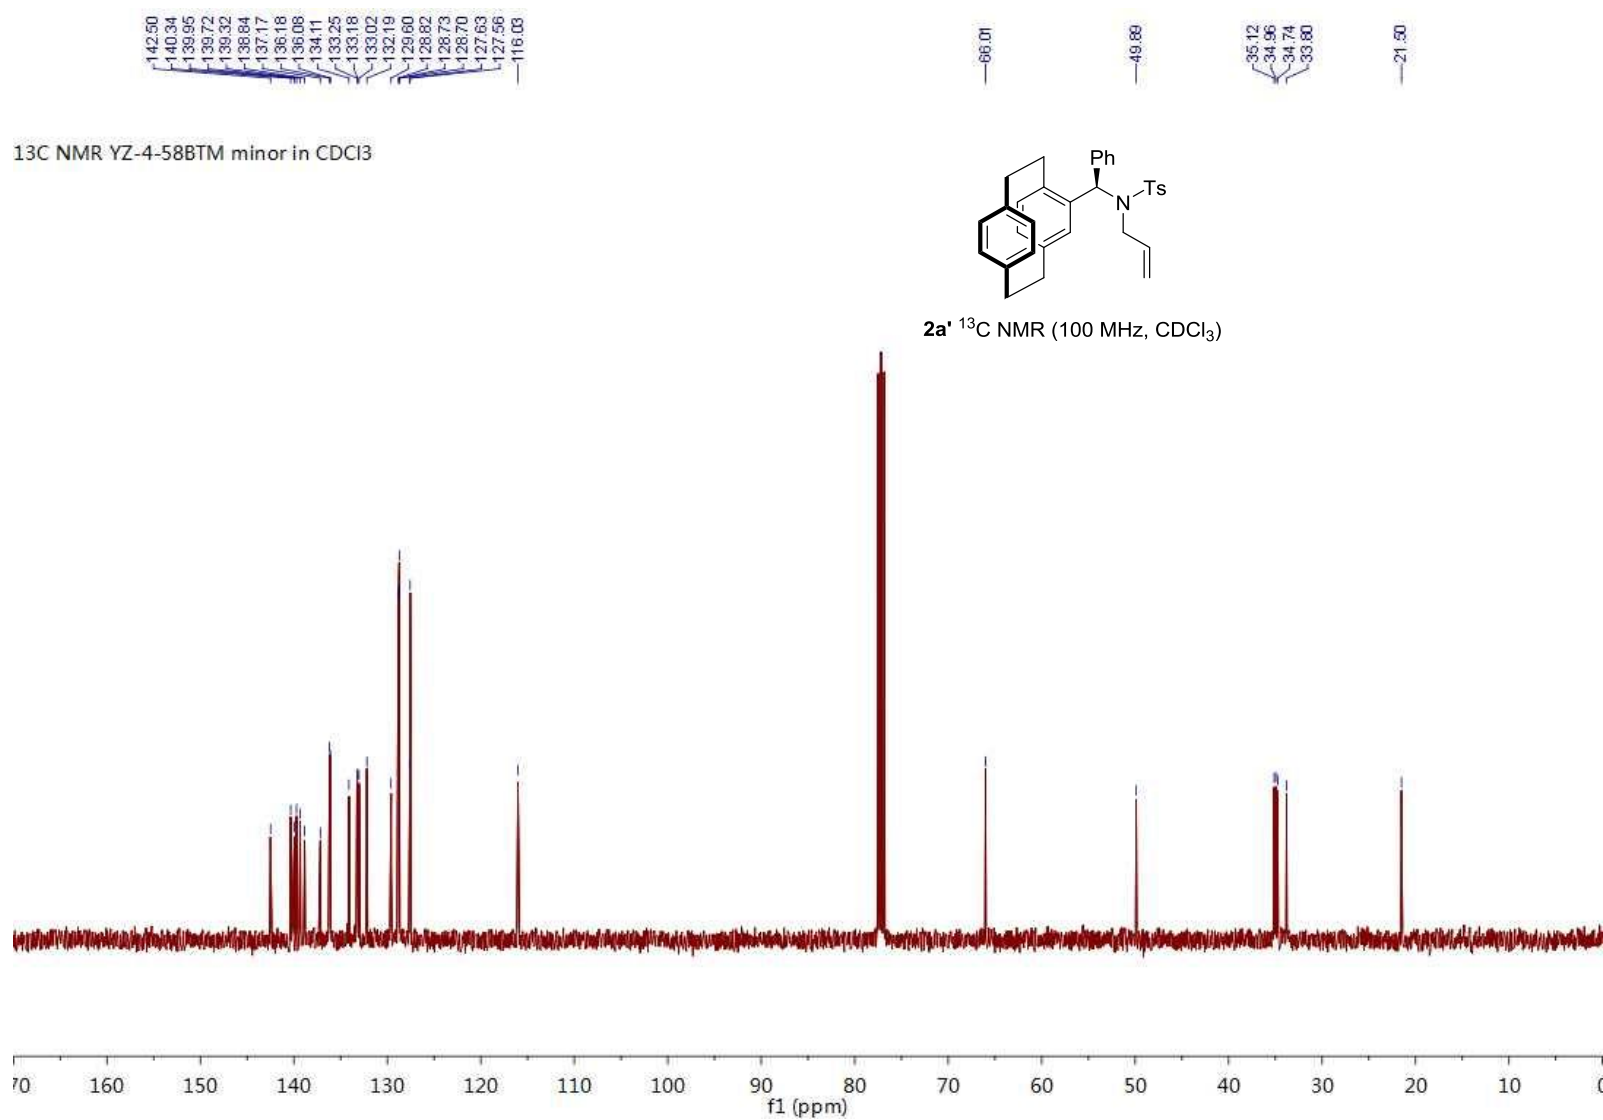

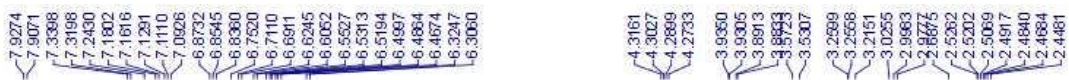

$^1\text{H}$  NMR YZ-4-60ATM in  $\text{CDCl}_3$

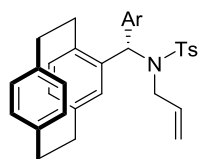

Ar = 2-MeC<sub>6</sub>H<sub>4</sub>

**2b**  $^1\text{H}$  NMR (400 MHz,  $\text{CDCl}_3$ )

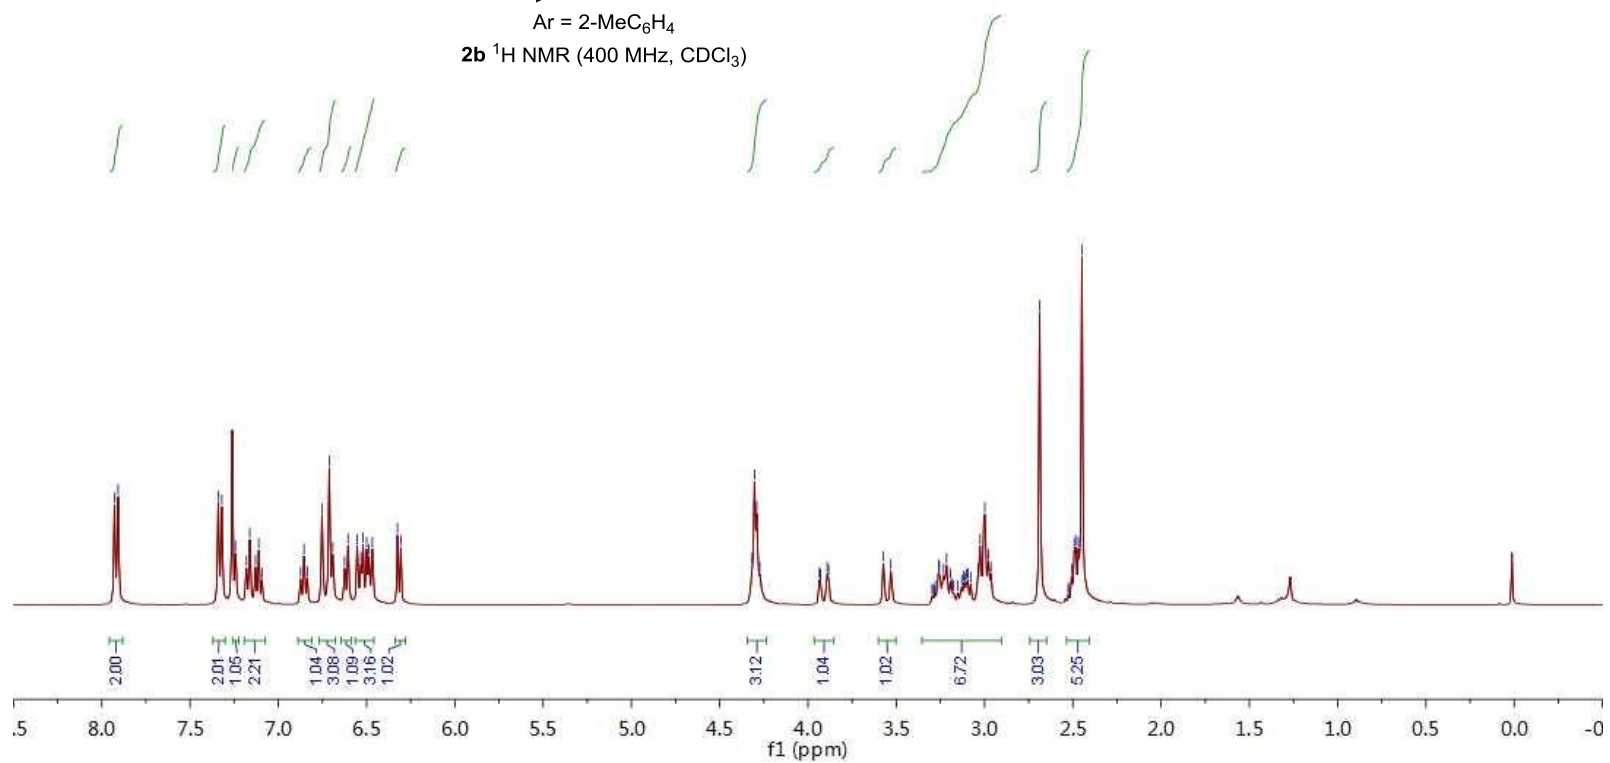

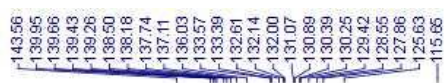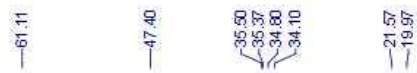

$^{13}\text{C}$  NMR YZ-4-60ATM in  $\text{CDCl}_3$

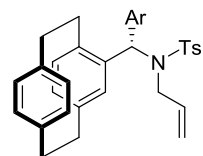

Ar = 2-MeC<sub>6</sub>H<sub>4</sub>

**2b**  $^{13}\text{C}$  NMR (100 MHz,  $\text{CDCl}_3$ )

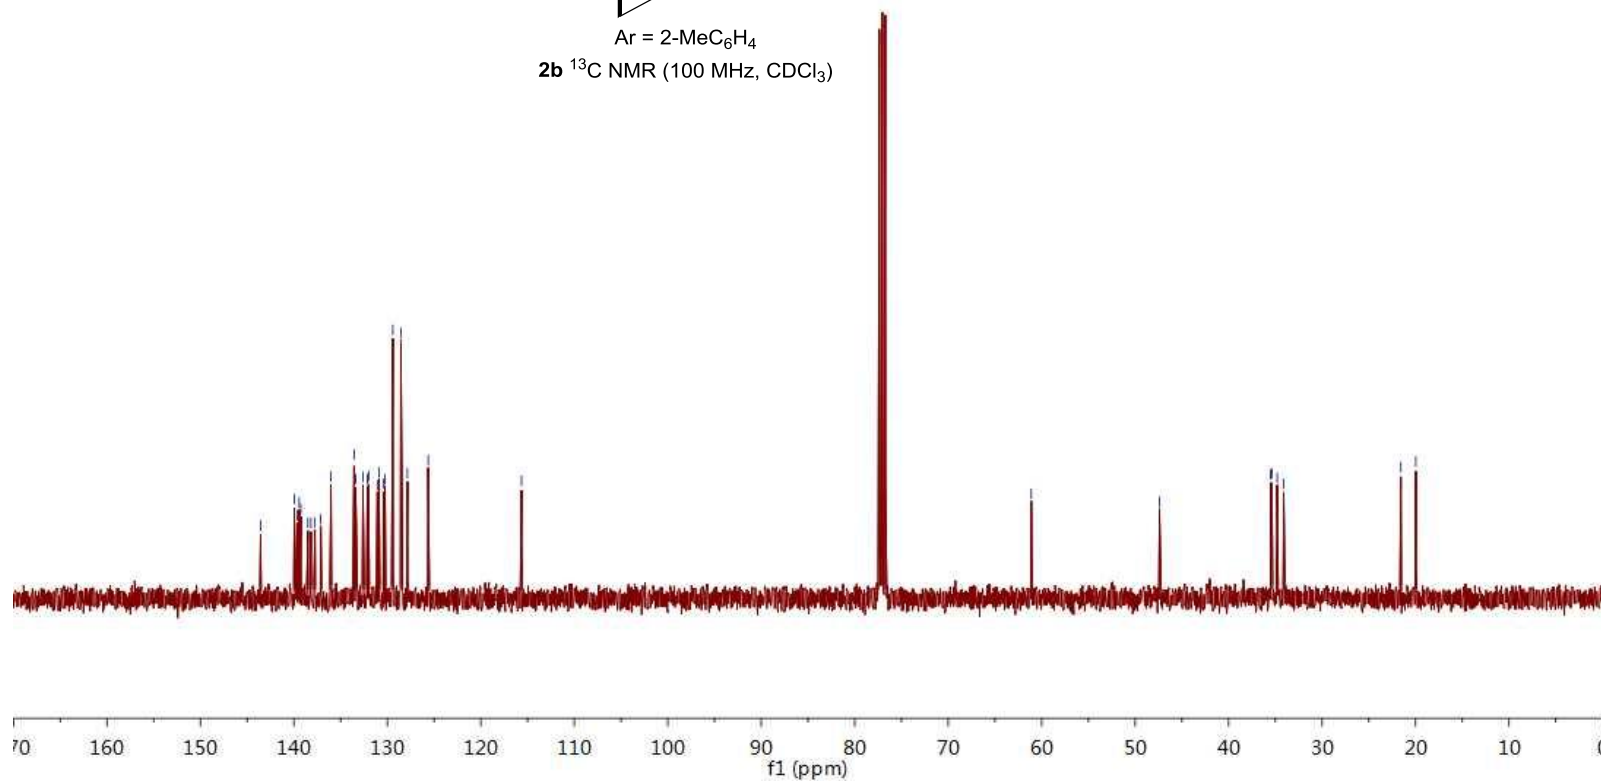

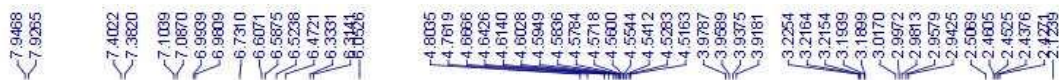

<sup>1</sup>H NMR YZ-4-60BTM in CDCl<sub>3</sub>

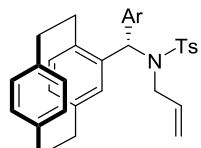

Ar = 3-MeC<sub>6</sub>H<sub>4</sub>

2c <sup>1</sup>H NMR (400 MHz, CDCl<sub>3</sub>)

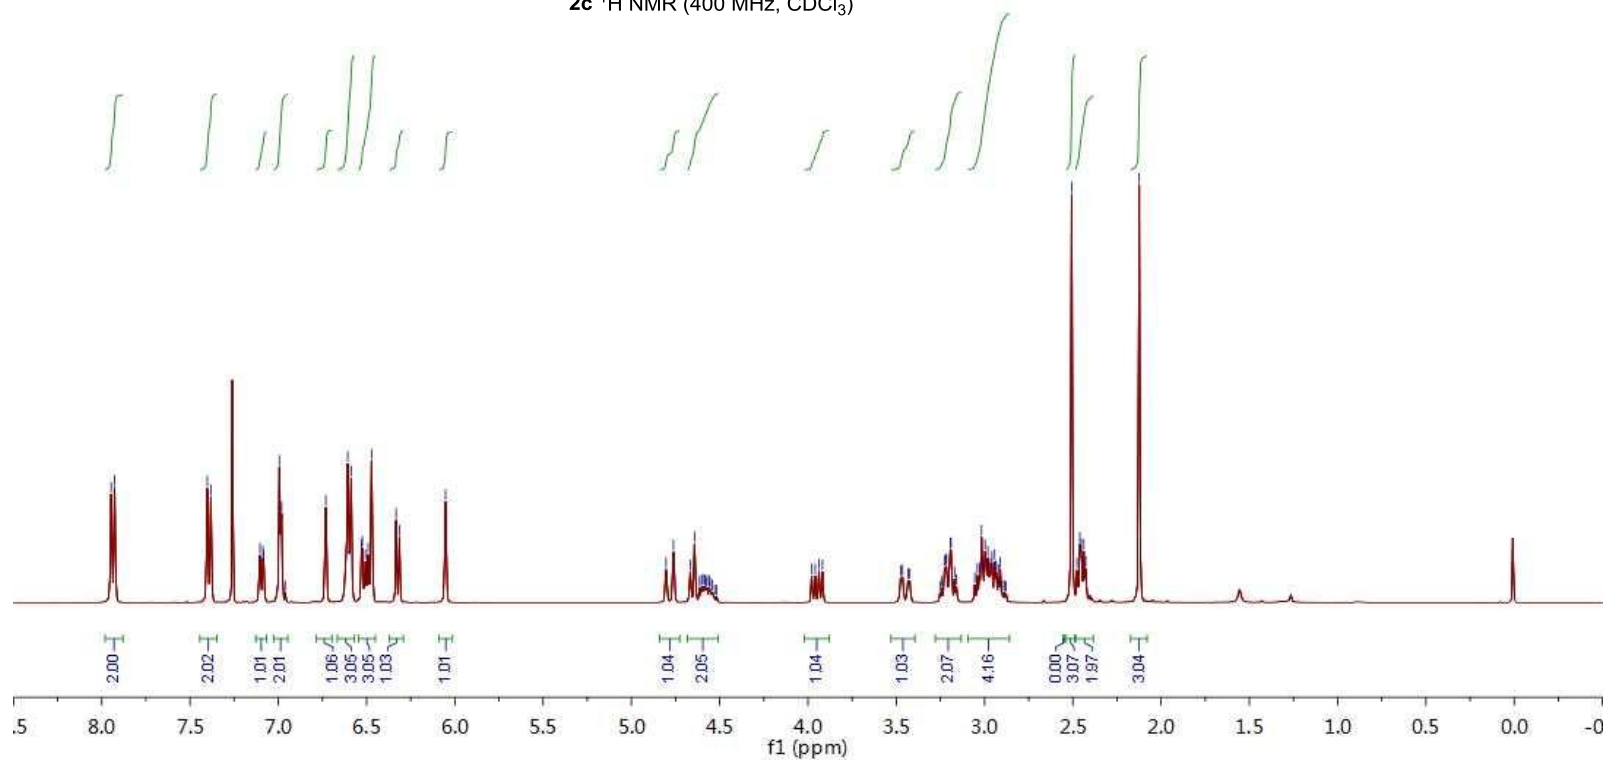



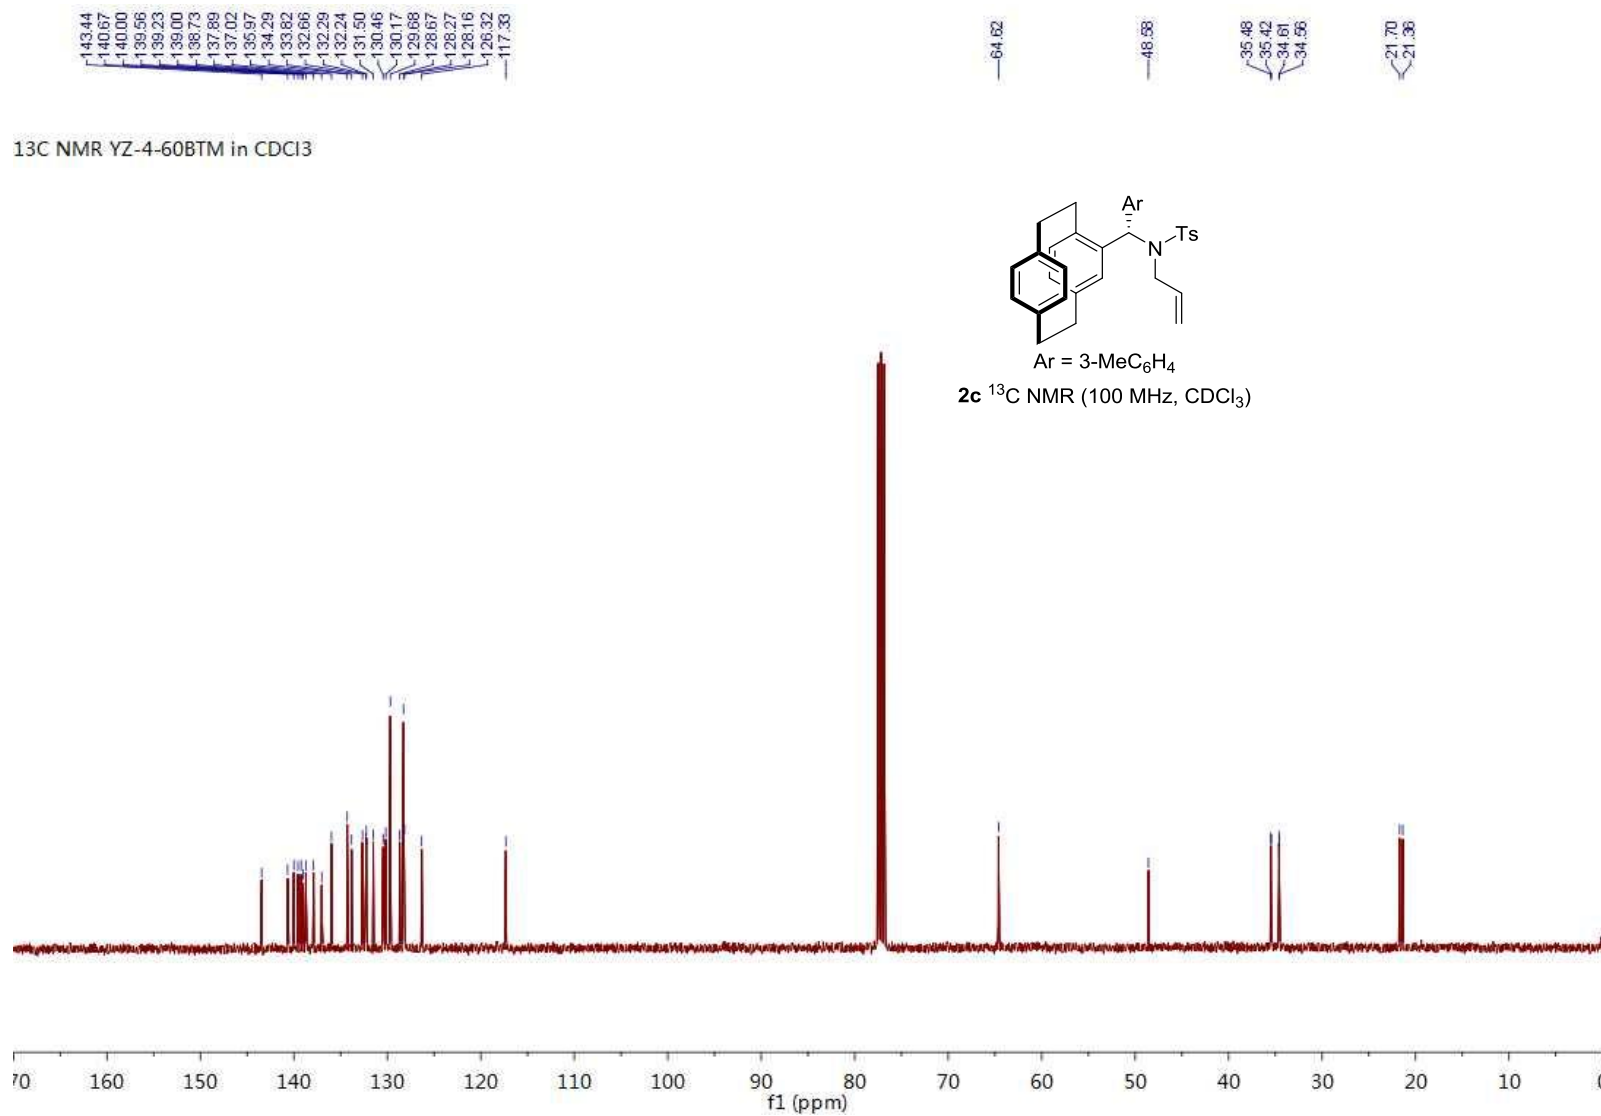

7.9411  
7.9212  
7.3696  
7.3687  
7.1045  
7.0863  
6.9370  
6.9175  
6.7381  
6.7209  
6.6077  
6.5680  
6.5678  
6.5282  
6.5088  
6.4873  
6.4687  
6.3334  
6.3146  
6.1466  
4.7803  
4.7707  
4.7452  
4.7347  
4.7240  
4.7232  
4.6513  
4.6216  
4.6106  
4.5879  
4.5625  
4.5703  
4.5569  
3.9476  
3.9447  
3.9210  
3.9044  
3.2247  
3.2127  
3.1950  
3.1878  
3.0260  
3.0148  
2.9704  
2.9503  
2.9184  
2.8850  
2.4635  
2.4481  
2.2753

<sup>1</sup>H NMR YZ-4-62TM in CDCl<sub>3</sub>

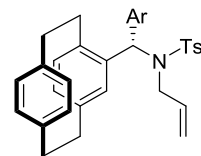

Ar = 4-MeC<sub>6</sub>H<sub>4</sub>

**2d** <sup>1</sup>H NMR (400 MHz, CDCl<sub>3</sub>)

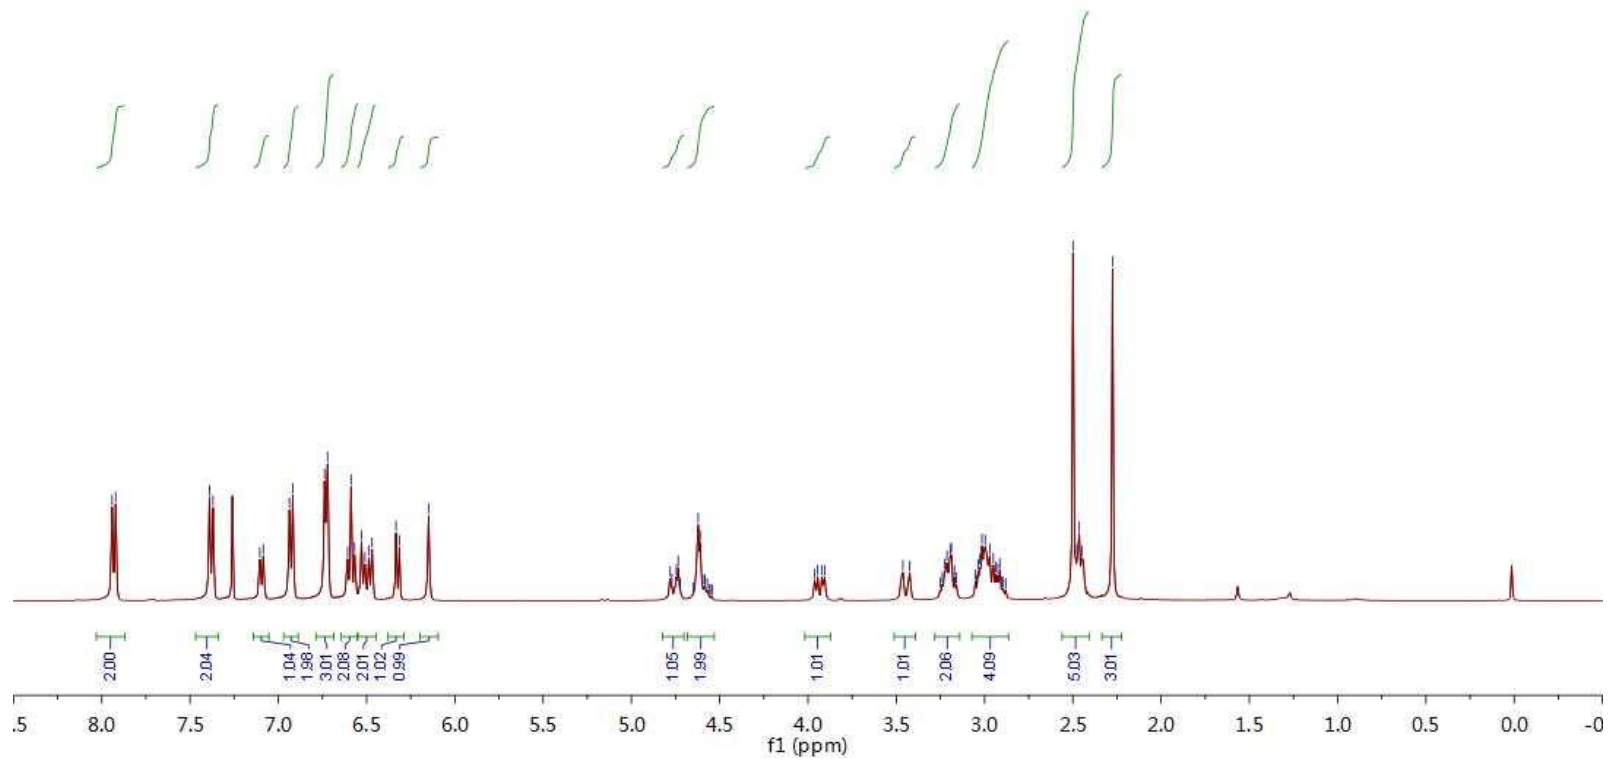

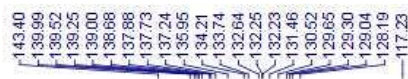

64.39

48.48

35.48

35.42

34.58

34.56

21.72

21.20

$^{13}\text{C}$  NMR YZ-4-62TM in  $\text{CDCl}_3$

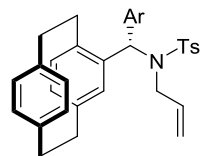

Ar = 4-MeC<sub>6</sub>H<sub>4</sub>

**2d**  $^{13}\text{C}$  NMR (100 MHz,  $\text{CDCl}_3$ )

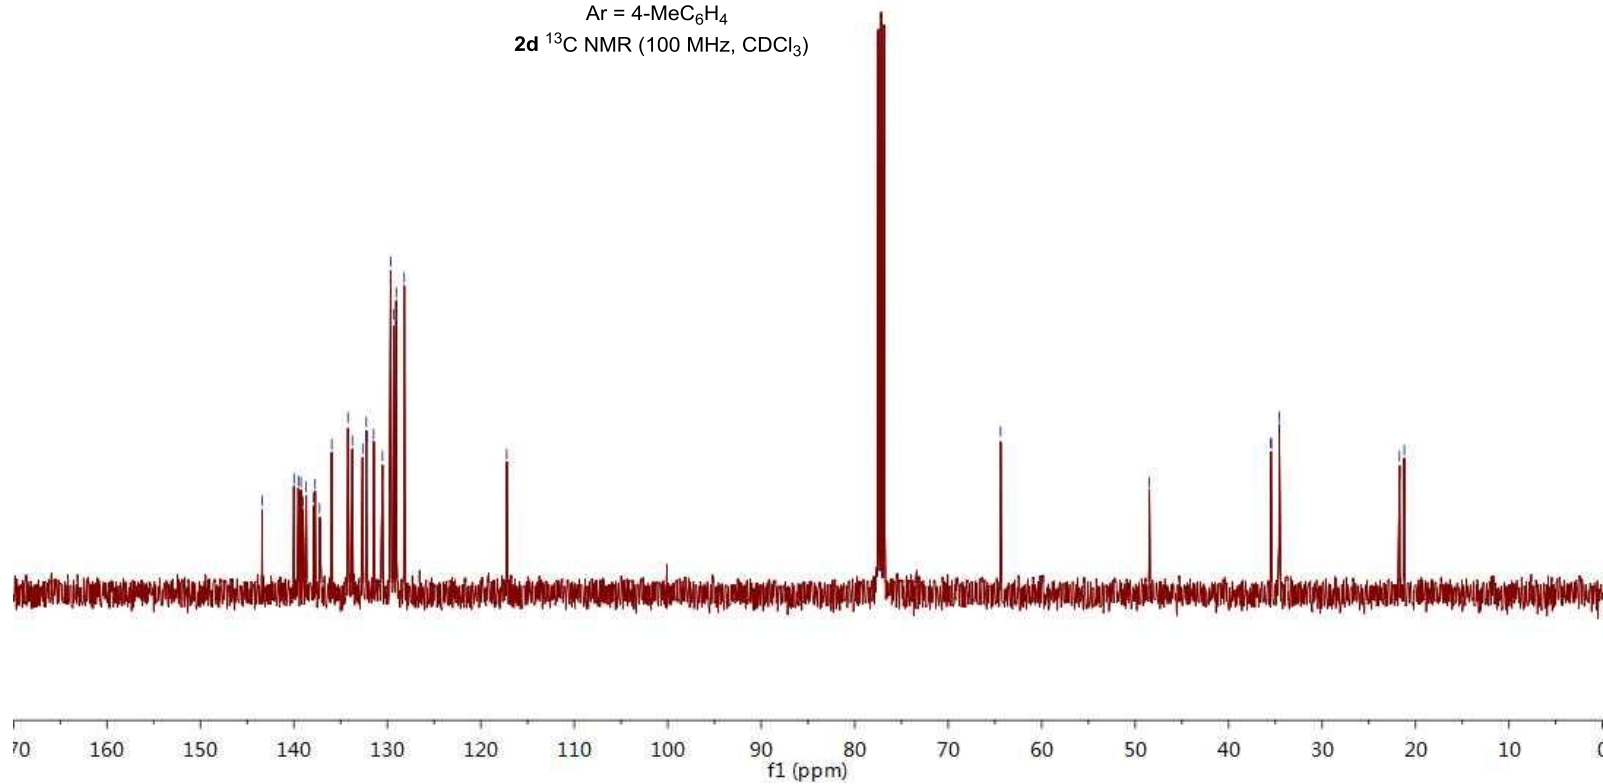

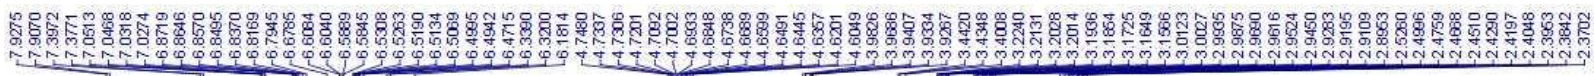

$^1\text{H}$  NMR YZ-4-65ATM in  $\text{CDCl}_3$

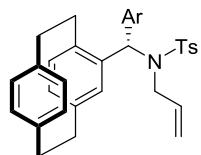

Ar = 4- $\text{FC}_6\text{H}_4$

**2e**  $^1\text{H}$  NMR (400 MHz,  $\text{CDCl}_3$ )

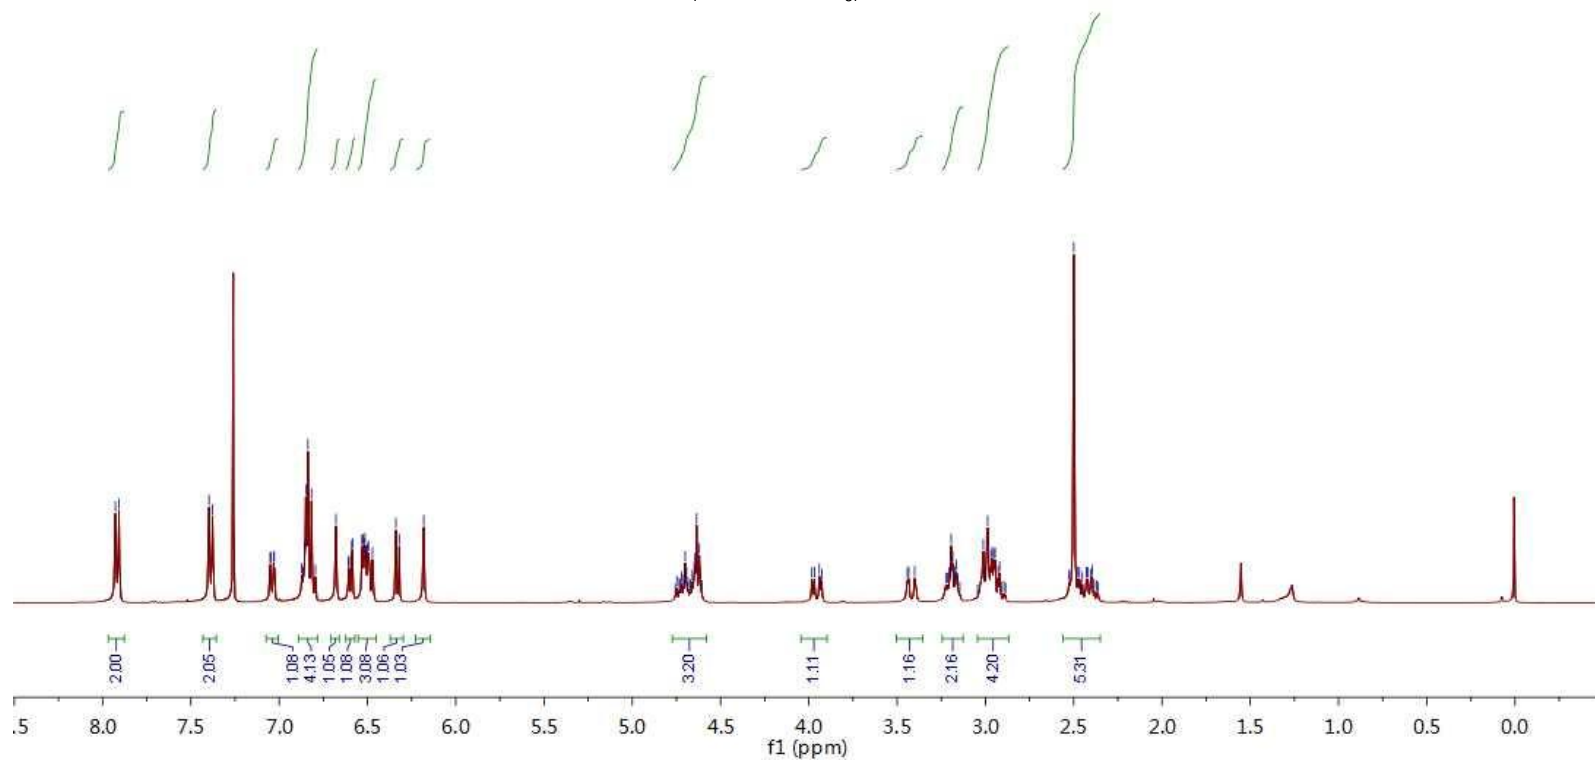

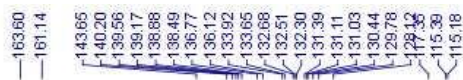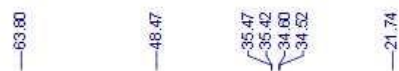

<sup>13</sup>C NMR YZ-4-65ATM in CDCl<sub>3</sub>

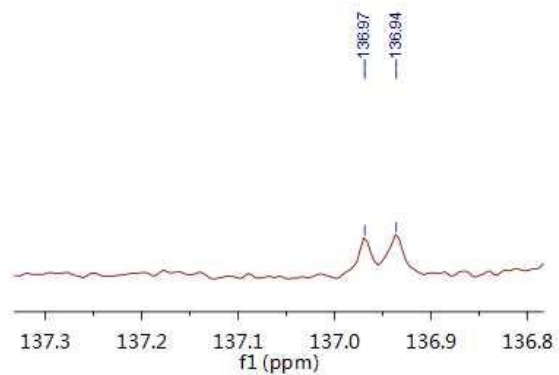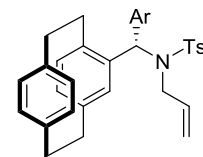

Ar = 4-FC<sub>6</sub>H<sub>4</sub>

**2e** <sup>13</sup>C NMR (100 MHz, CDCl<sub>3</sub>)

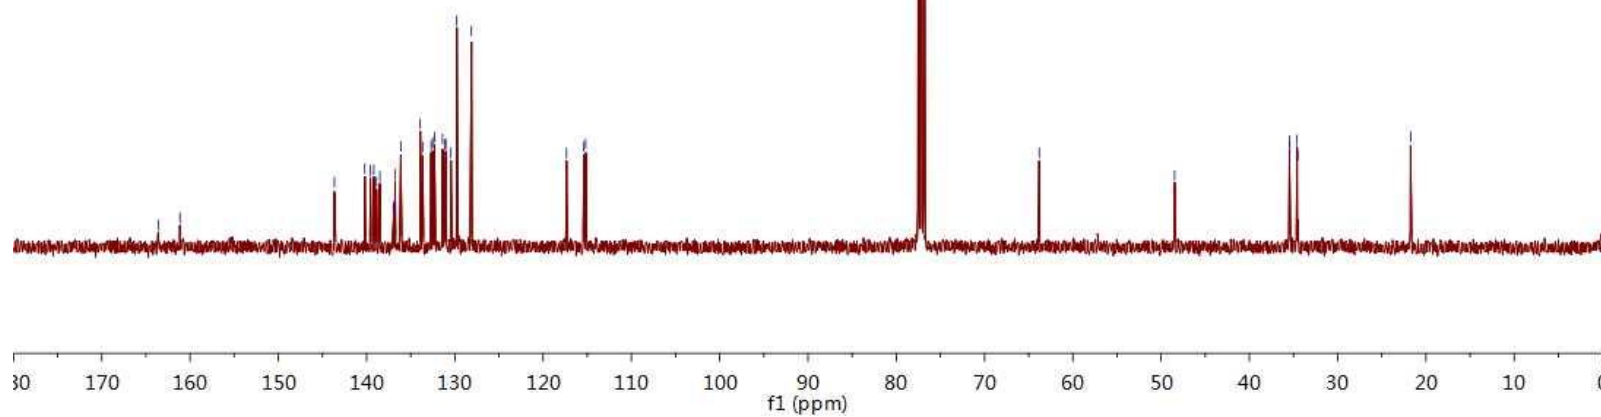

<sup>19</sup>F NMR YZ-4-65ATM in CDCl<sub>3</sub>

-113.83

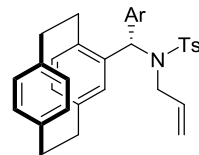

Ar = 4-FC<sub>6</sub>H<sub>4</sub>

**2e** <sup>19</sup>F NMR (376 MHz, CDCl<sub>3</sub>)

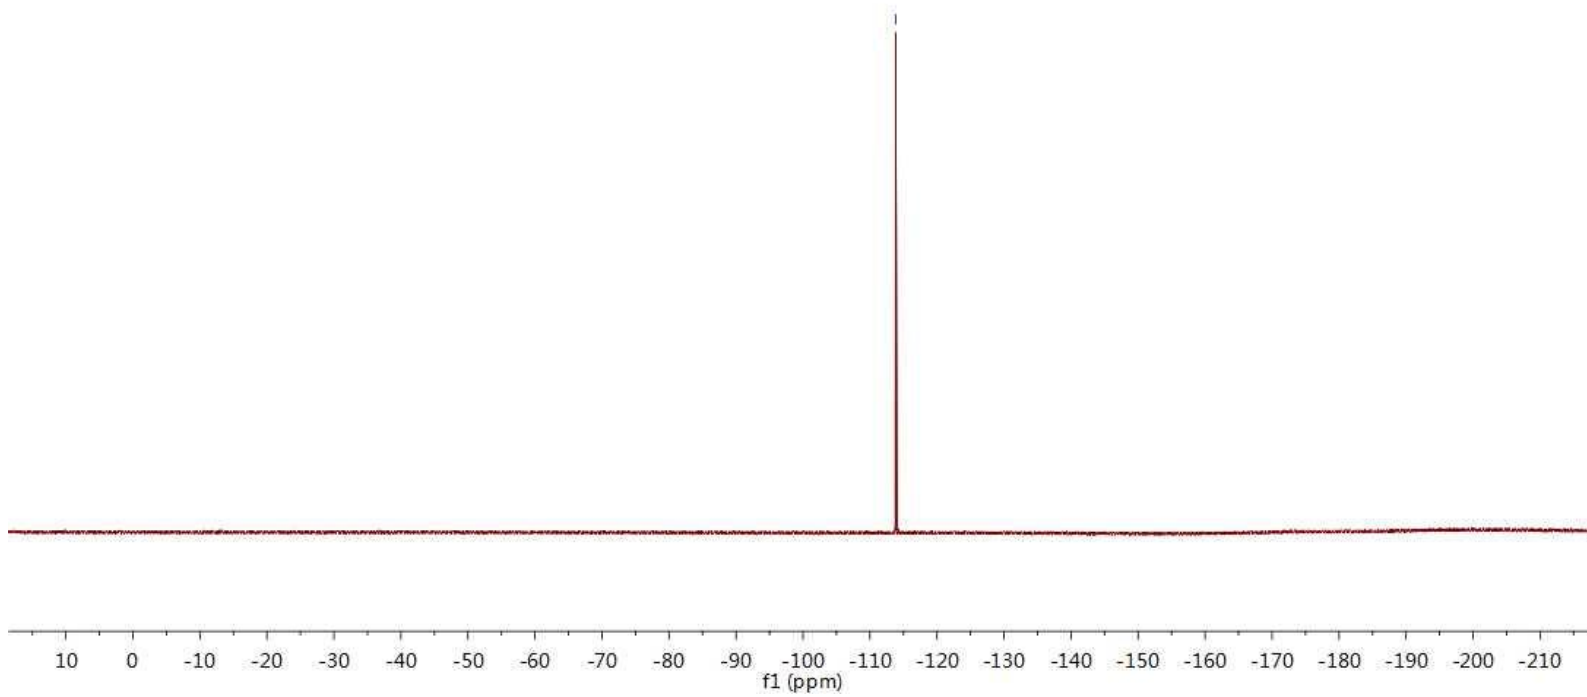

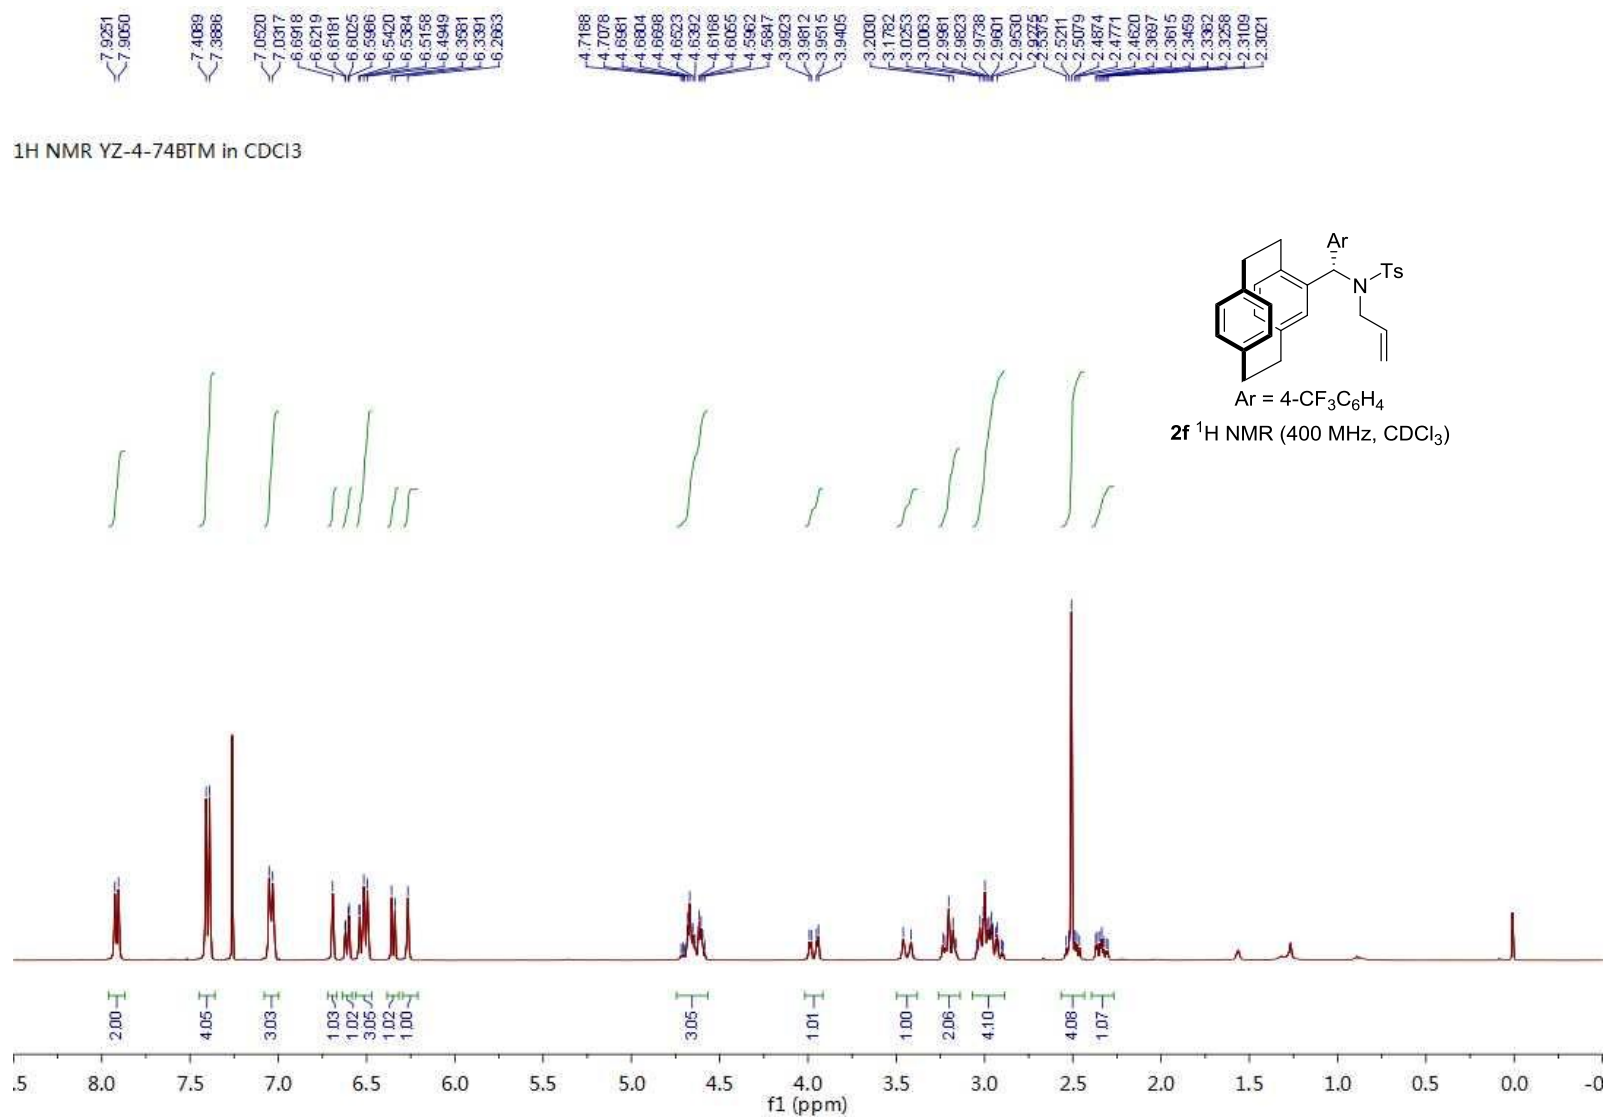

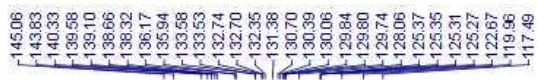

63.97

48.63

35.44

35.41

34.58

34.47

21.72

<sup>1</sup>H NMR YZ-4-74BTM in CDCl<sub>3</sub>

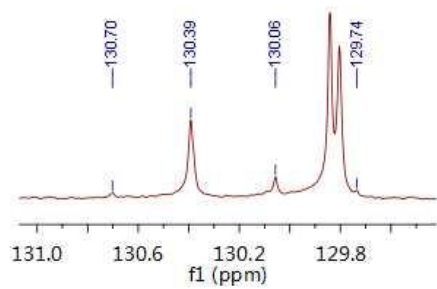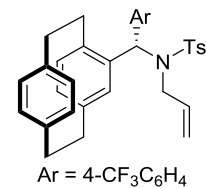

**2f** <sup>13</sup>C NMR (100 MHz, CDCl<sub>3</sub>)

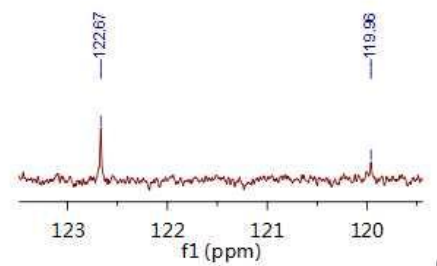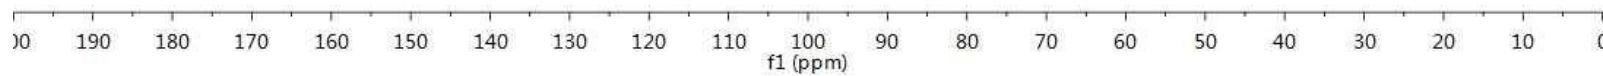



19F NMR YZ-4-74BTM in CDCl3

62.52

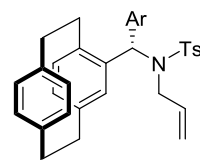

Ar = 4-CF<sub>3</sub>C<sub>6</sub>H<sub>4</sub>

2f <sup>19</sup>F NMR (376 MHz, CDCl<sub>3</sub>)

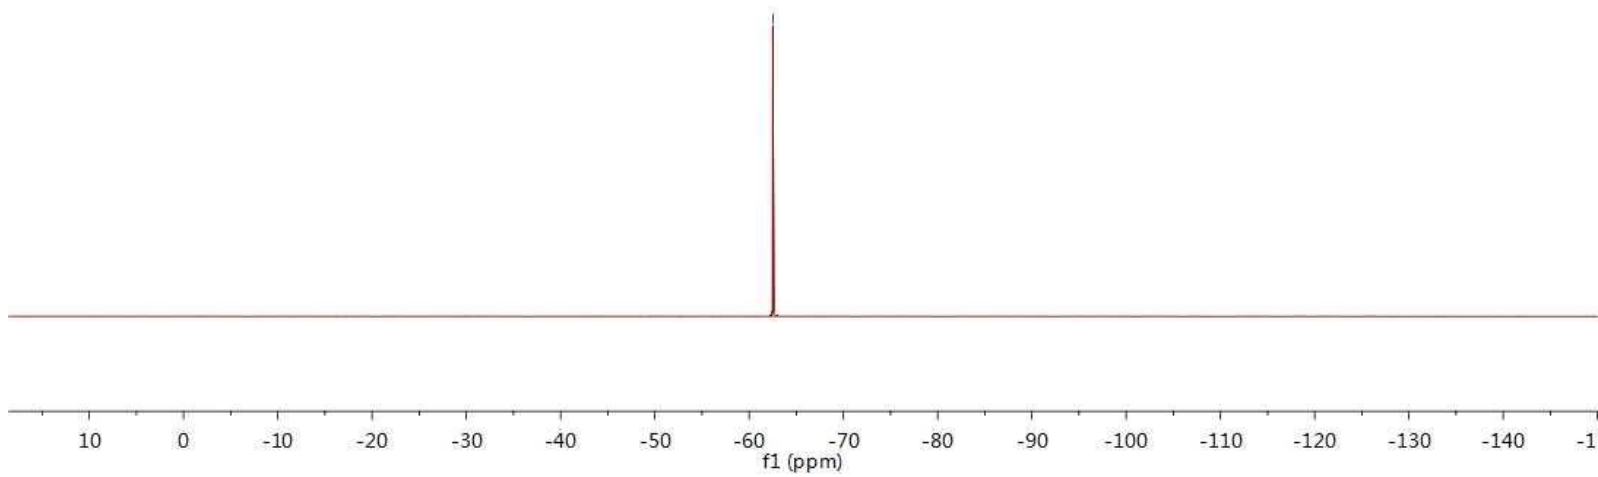

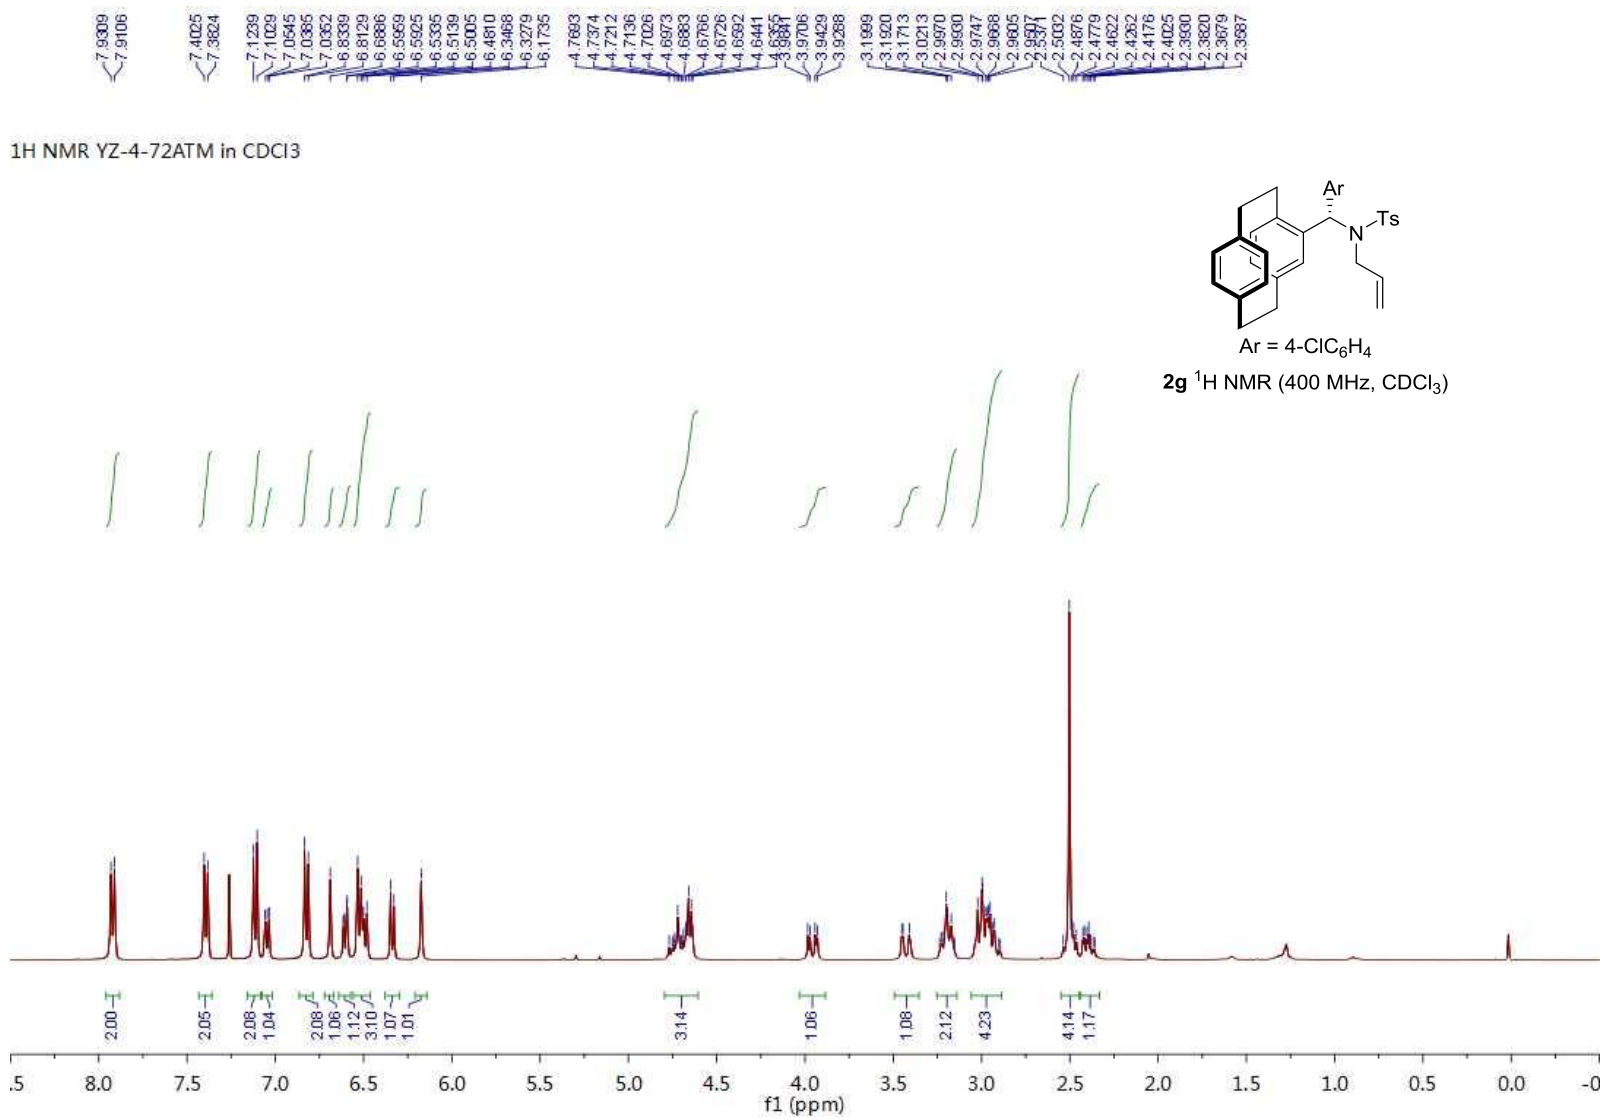

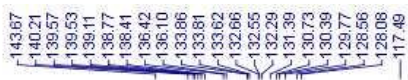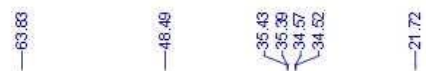

$^{13}\text{C}$  NMR YZ-4-72ATM in  $\text{CDCl}_3$

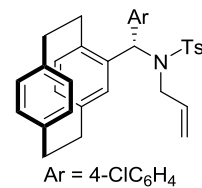

**2g**  $^{13}\text{C}$  NMR (100 MHz,  $\text{CDCl}_3$ )

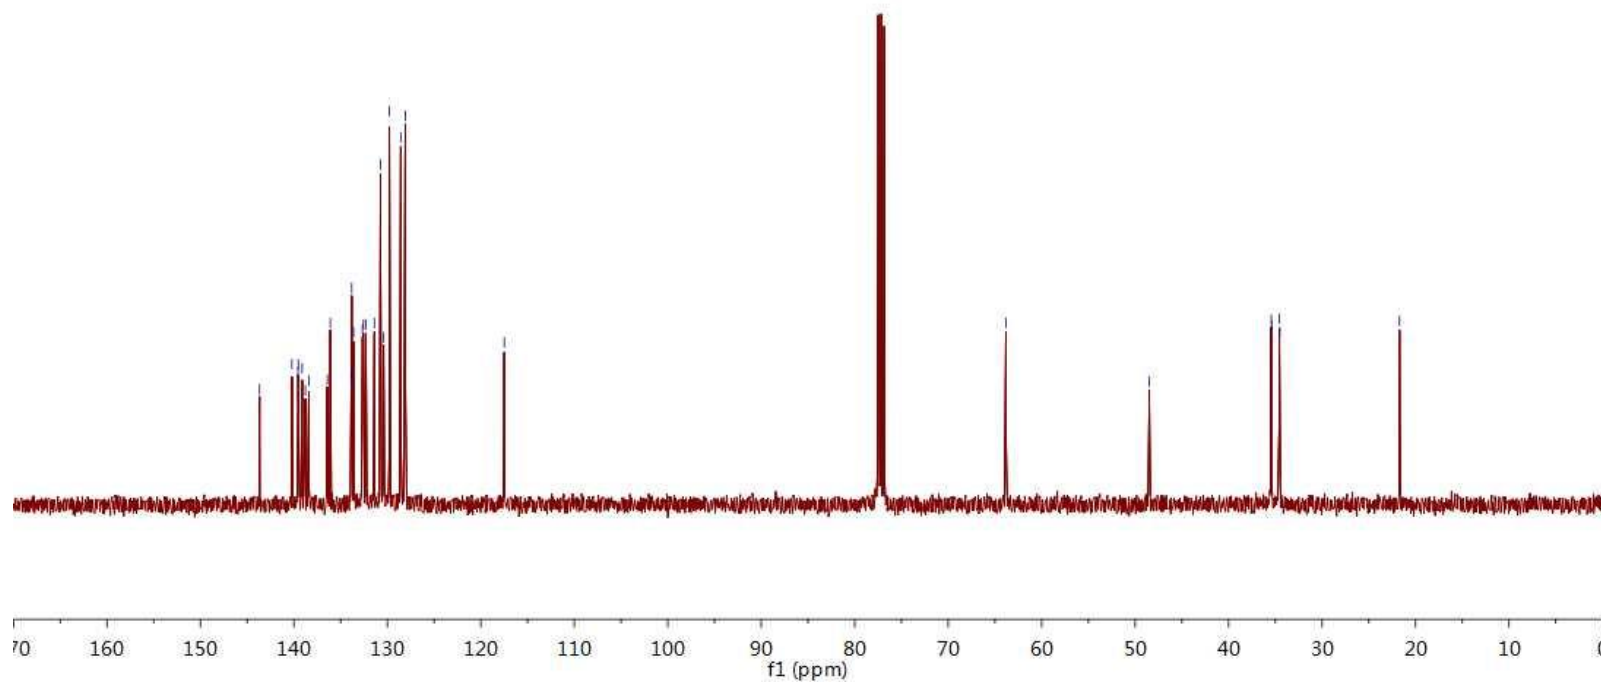

7.9455  
7.9251  
7.4142  
7.3940  
7.1329  
7.1176  
7.1130  
7.0860  
7.0681  
7.0781  
7.0615  
7.0571  
7.0419  
7.0377  
6.9253  
6.9197  
6.9046  
6.8990  
6.8842  
6.8784  
6.7208  
6.7012  
6.6875  
6.6169  
6.6126  
6.5973  
6.5932  
6.5377  
6.5167  
6.5139  
6.5044  
6.4816  
6.3528  
6.3339  
6.1629  
4.7600  
4.7450  
4.7317  
4.7203  
4.7123  
4.7050  
4.6940  
4.6783  
4.6696  
4.6585  
4.6536  
4.6442  
4.6284  
4.6143  
4.0057  
3.9920  
3.9644  
3.9498  
3.4488  
3.4147  
3.2383  
3.2298  
3.2221  
3.2103  
3.2013  
3.1932  
3.1727  
3.1629  
3.1547  
3.0368  
3.0257  
3.0206  
2.9959  
2.9831  
2.9748  
2.9696  
2.9388  
2.9303  
2.9057  
2.5506  
2.5347  
2.5259  
2.5060  
2.4911  
2.4755  
2.4448  
2.4357  
2.4207  
2.4113  
2.4003  
2.3881

<sup>1</sup>H NMR YZ-4-74ATM in CDCl<sub>3</sub>

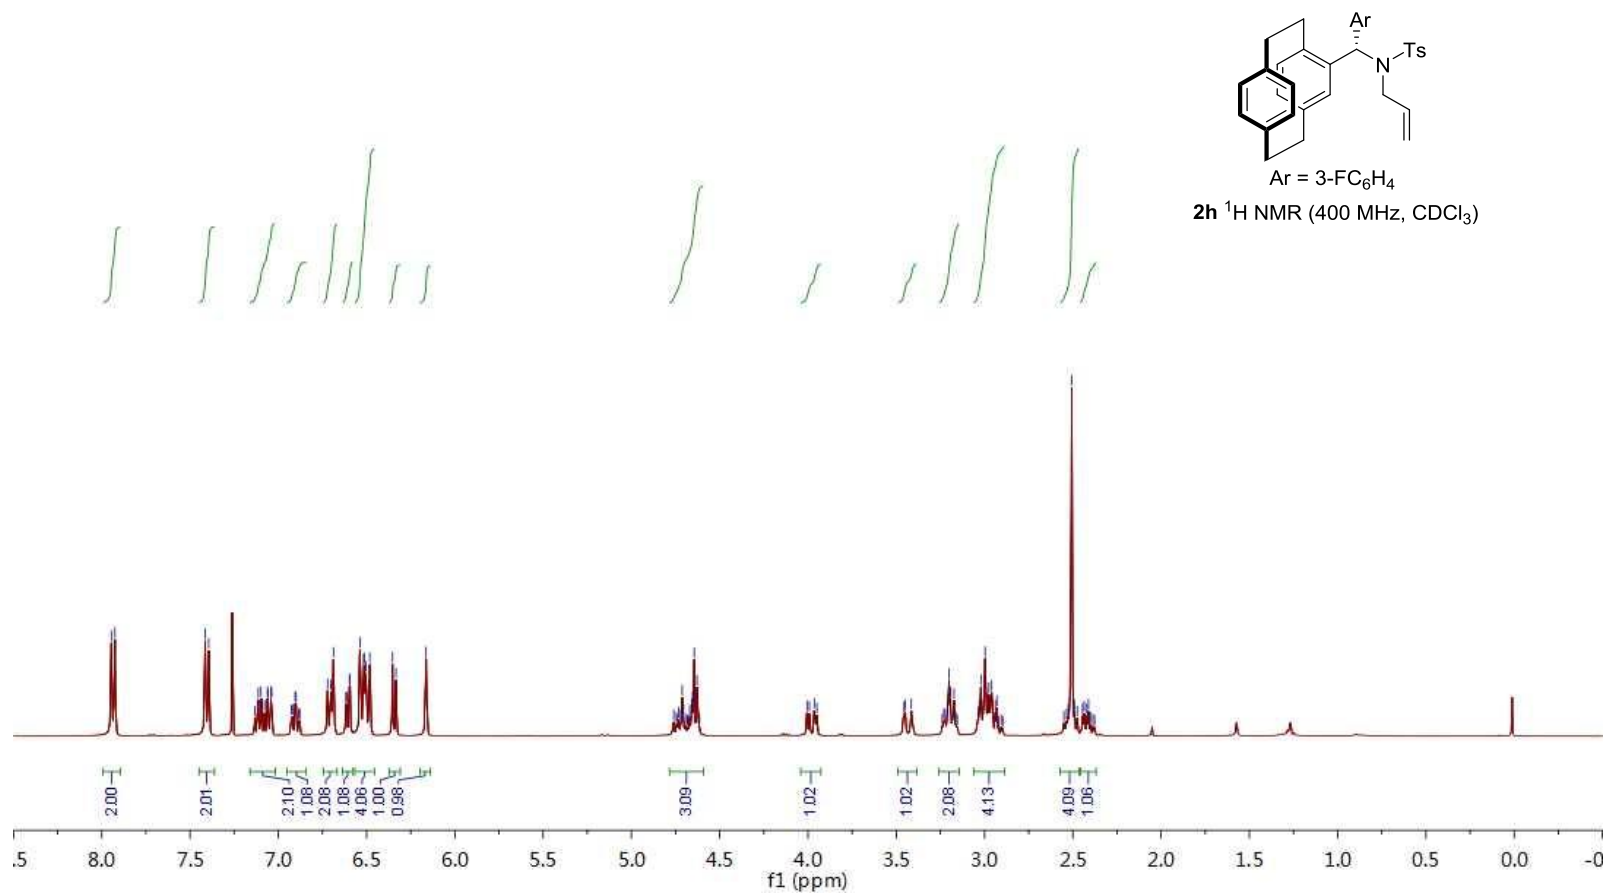

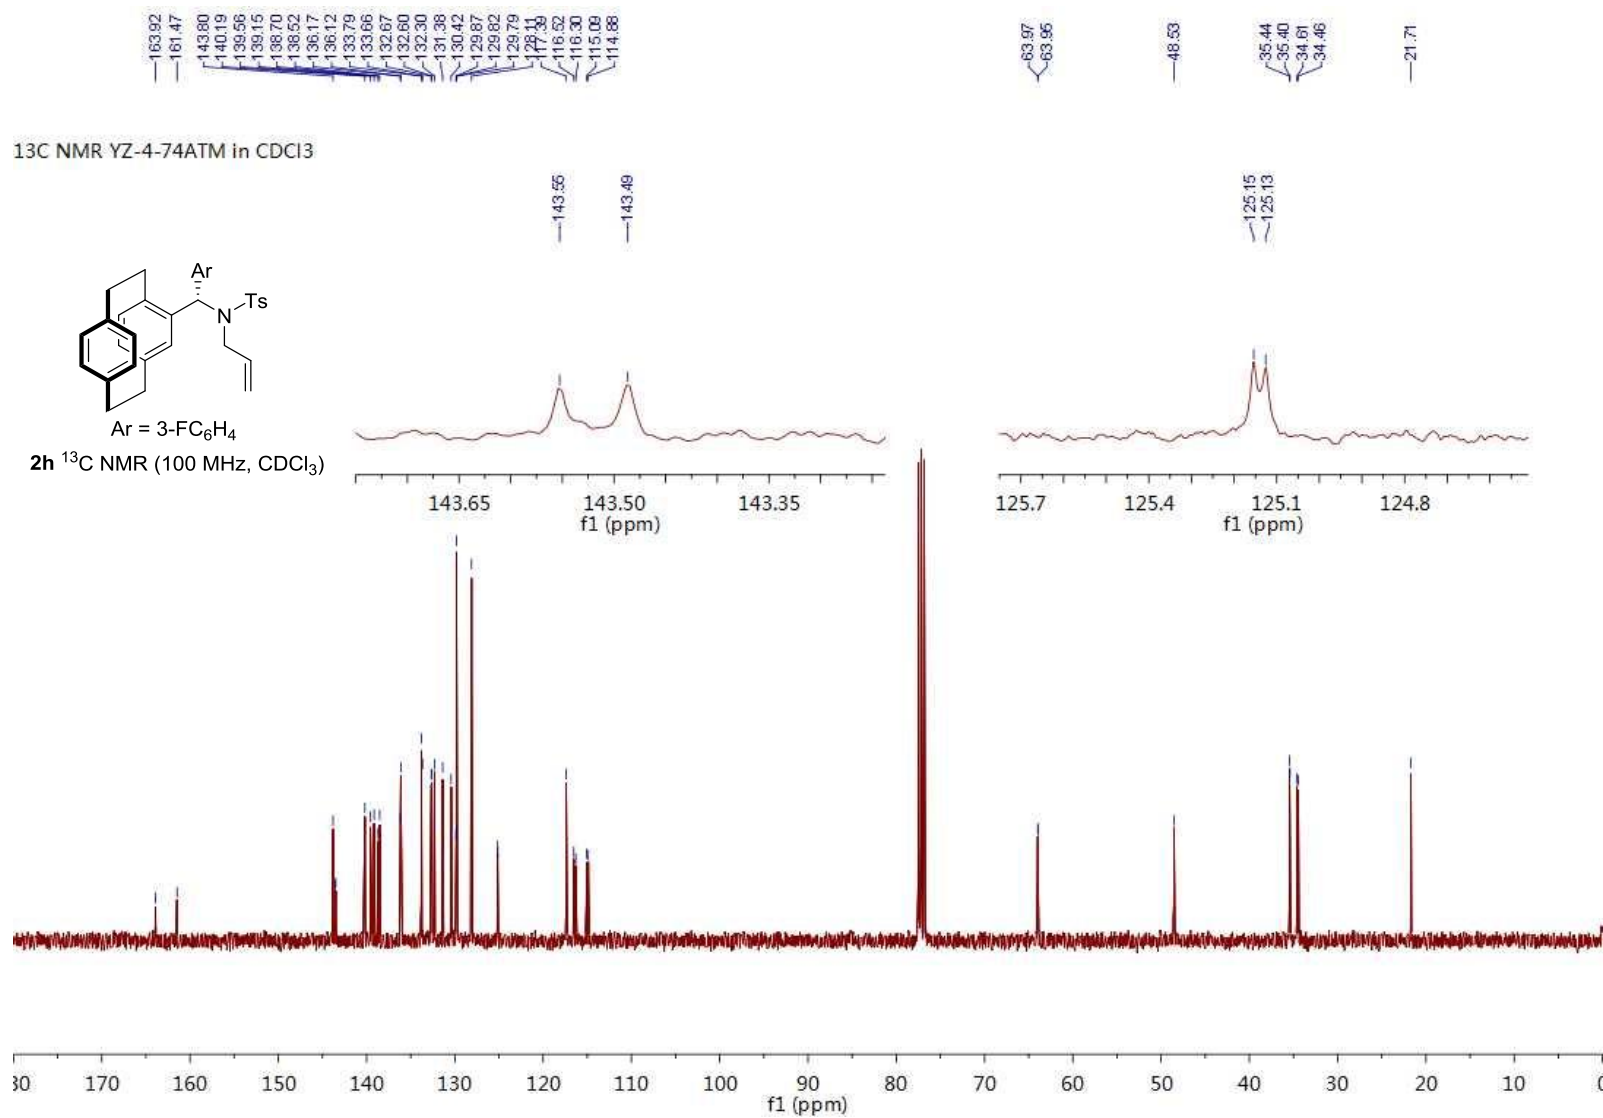

<sup>19</sup>F NMR YZ-4-74ATM in CDCl<sub>3</sub>

-112.83

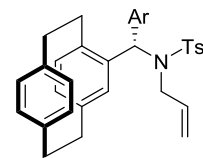

Ar = 3-FC<sub>6</sub>H<sub>4</sub>

**2h** <sup>19</sup>F NMR (376 MHz, CDCl<sub>3</sub>)

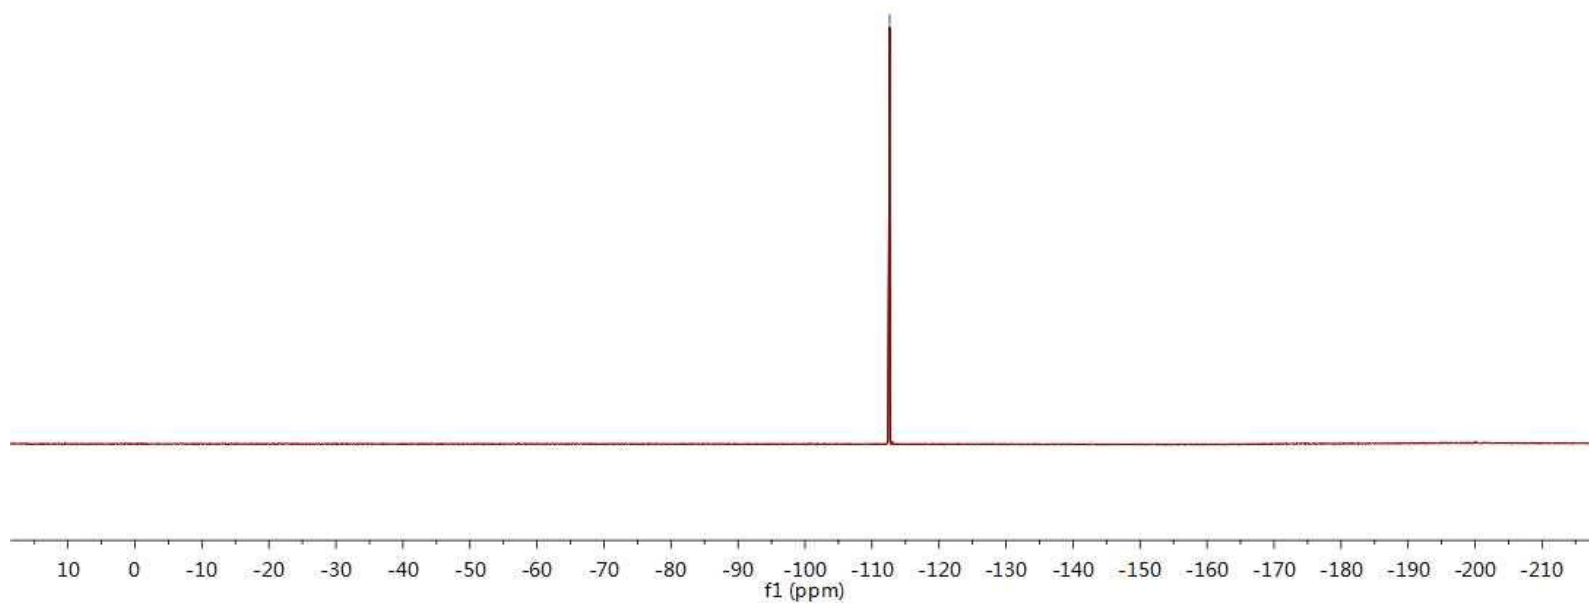

7.9387  
7.9192  
7.4230  
7.4087  
7.1865  
7.1840  
7.1866  
7.1641  
7.0733  
7.0589  
7.0539  
7.0398  
7.0345  
6.7754  
6.7559  
6.7040  
6.6155  
6.6111  
6.5970  
6.5925  
6.5620  
6.5579  
6.5423  
6.5365  
6.5313  
6.5161  
6.5108  
6.5076  
6.4876  
6.3916  
6.3326  
6.0623  
4.7943  
4.7819  
4.7687  
4.7565  
4.7475  
4.7367  
4.6910  
4.6840  
4.6816  
4.6713  
4.6613  
4.6503  
4.6456  
4.0102  
3.9940  
3.9686  
3.9531  
3.4579  
3.4506  
3.4110  
3.2430  
3.2276  
3.2080  
3.1932  
3.1789  
3.1704  
3.1562  
3.0455  
3.0305  
3.0217  
3.0087  
2.9966  
2.9860  
2.9799  
2.9685  
2.9616  
2.9509  
2.9463  
2.9362  
2.9273  
2.9163  
2.9080  
2.5420  
2.5188  
2.4916  
2.4825  
2.4688  
2.4181  
2.4069  
2.3955  
2.3866  
2.3740  
2.3610  
2.3515

<sup>1</sup>H NMR YZ-4-77TM in CDCl<sub>3</sub>

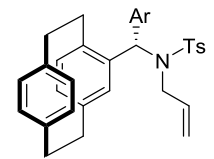

Ar = 3-ClC<sub>6</sub>H<sub>4</sub>

2i <sup>1</sup>H NMR (400 MHz, CDCl<sub>3</sub>)

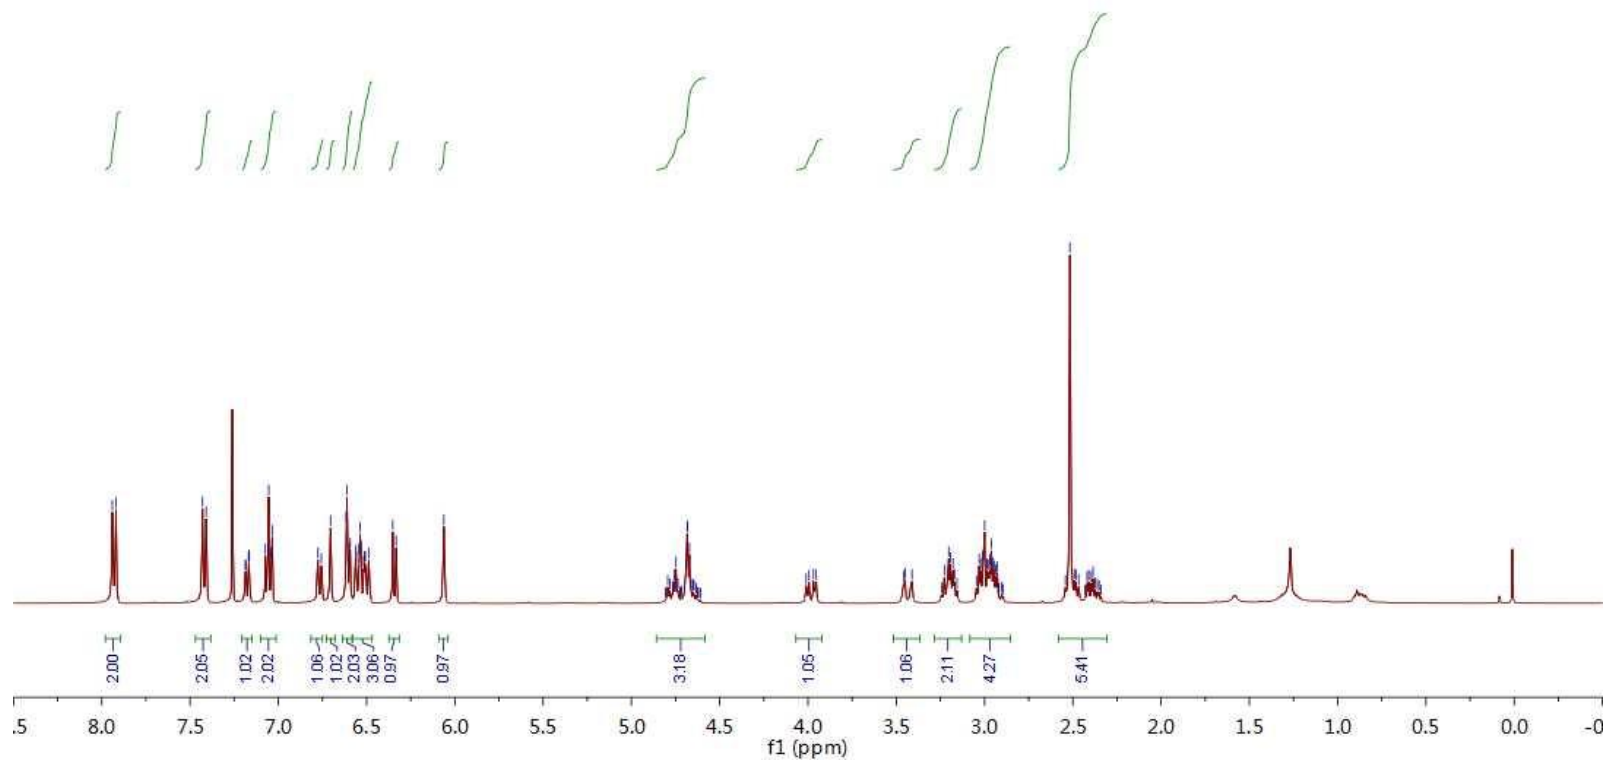

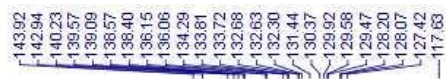

$^{13}\text{C}$  NMR YZ-4-77TM in  $\text{CDCl}_3$

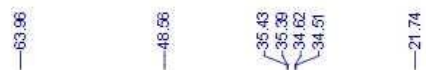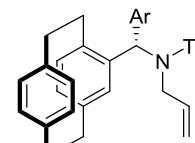

Ar = 3-ClC<sub>6</sub>H<sub>4</sub>

**2i**  $^{13}\text{C}$  NMR (100 MHz,  $\text{CDCl}_3$ )

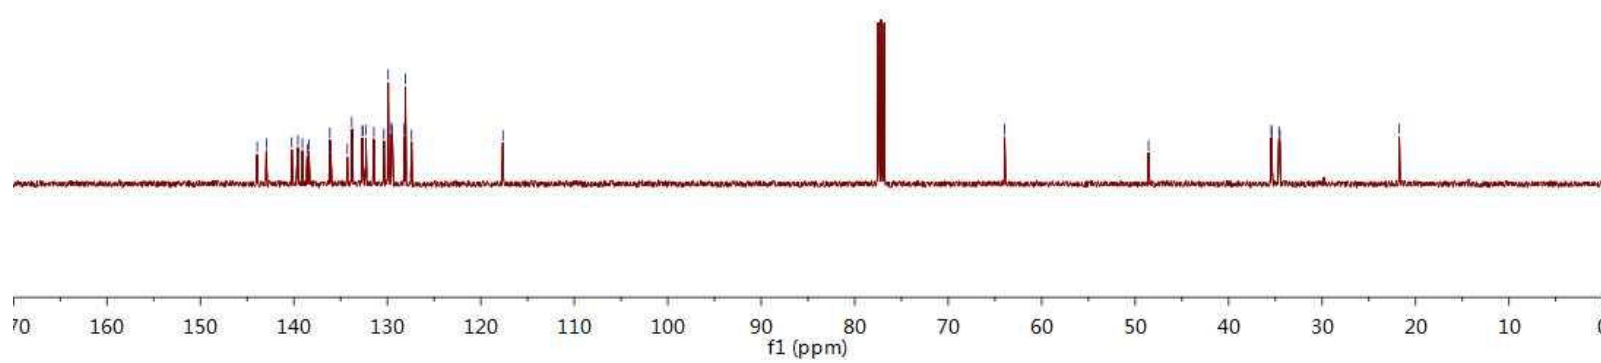



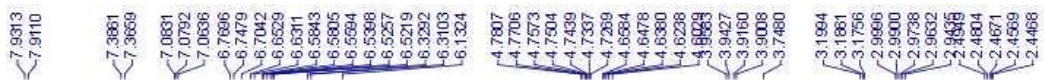

$^1\text{H}$  NMR YZ-4-65BTM in  $\text{CDCl}_3$

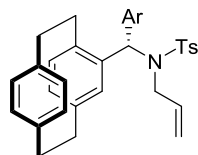

Ar = 4-MeOC<sub>6</sub>H<sub>4</sub>

**2j**  $^1\text{H}$  NMR (400 MHz,  $\text{CDCl}_3$ )

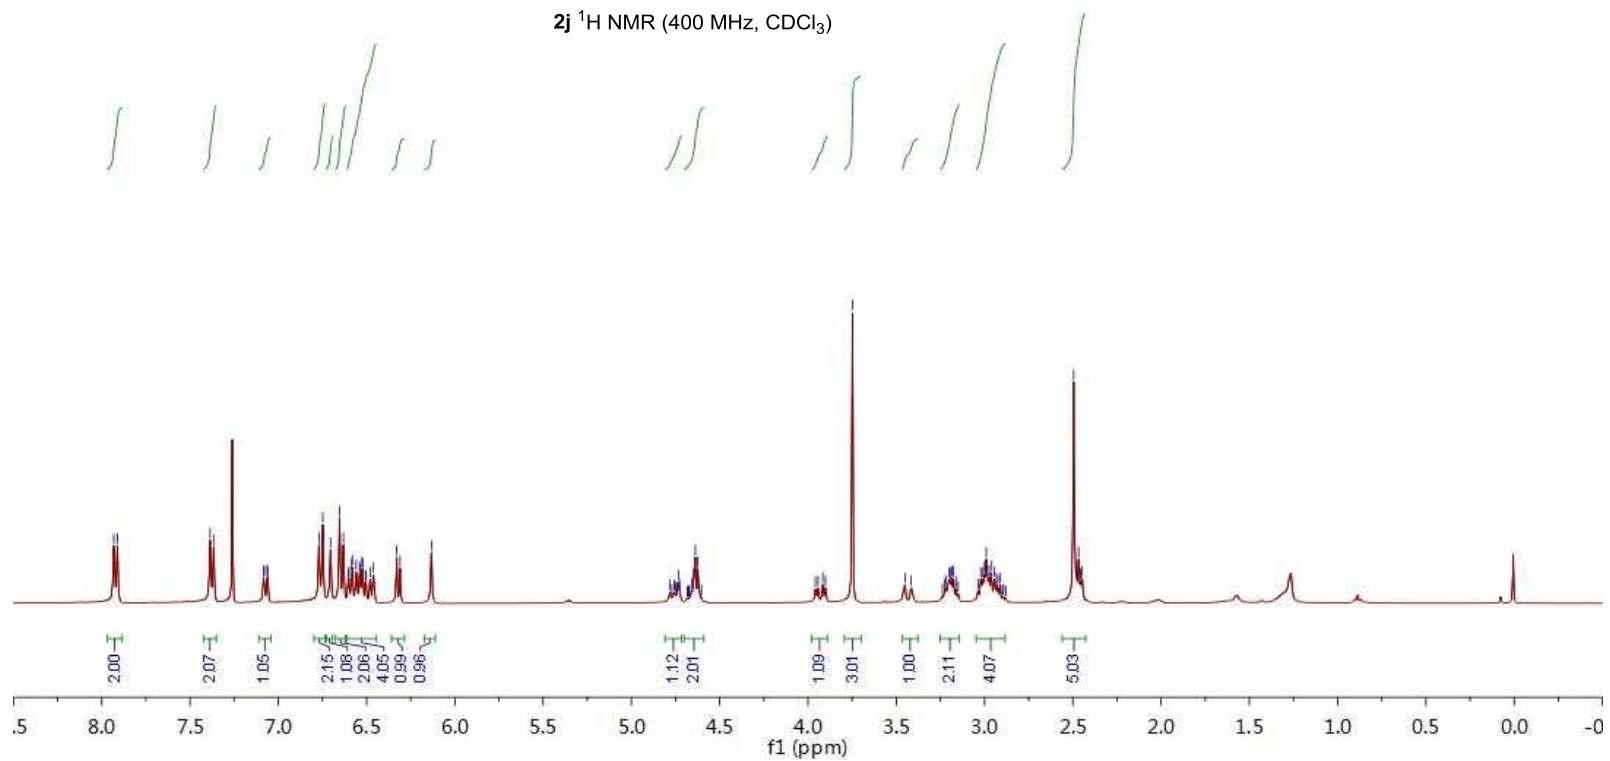

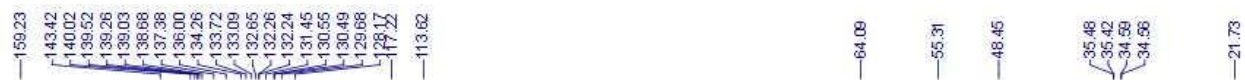

$^{13}\text{C}$  NMR YZ-4-65BTM in  $\text{CDCl}_3$

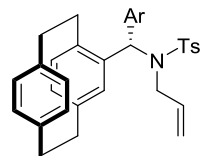

Ar = 4-MeOC<sub>6</sub>H<sub>4</sub>

**2j**  $^{13}\text{C}$  NMR (100 MHz,  $\text{CDCl}_3$ )

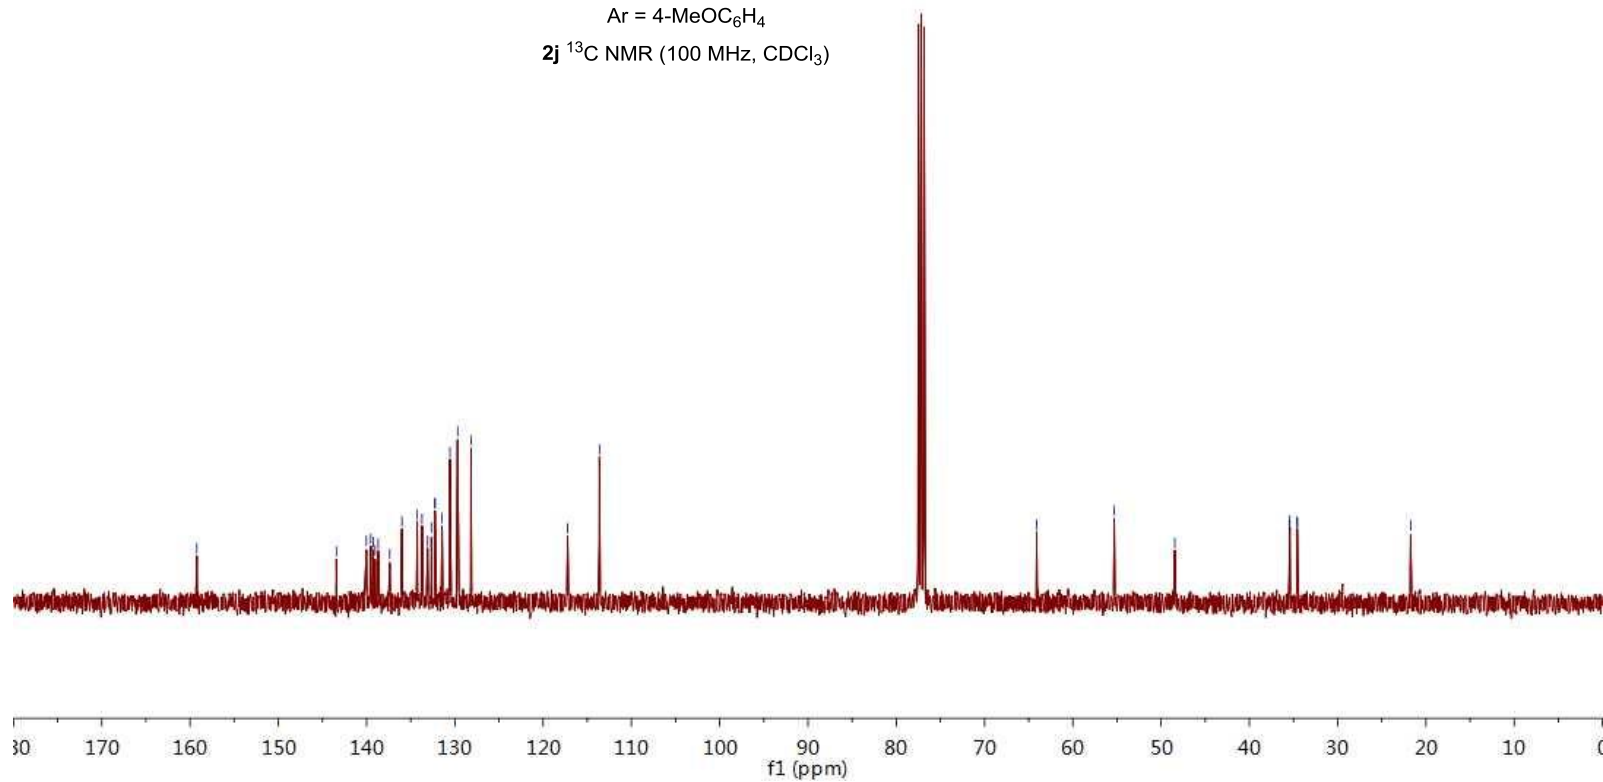

7.9688  
7.9685  
7.7812  
7.7629  
7.6463  
7.6239  
7.5023  
7.4630  
7.4589  
7.4489  
7.4445  
7.4368  
7.4206  
7.4002  
7.1957  
7.1447  
7.0423  
7.0387  
7.0174  
6.8165  
6.6405  
6.6206  
6.5439  
6.5261  
6.3719  
6.3530  
6.3324  
4.7336  
4.6937  
4.6118  
4.5968  
4.5872  
4.5804  
4.5664  
4.5571  
4.5452  
4.5287  
4.5066  
4.5025  
3.9971  
3.9739  
3.9567  
3.5842  
3.5764  
3.5438  
3.2471  
3.2380  
3.0609  
3.0524  
3.0343  
3.0176  
2.4413  
2.4279  
2.4167

<sup>1</sup>H NMR YZ-4-68TM in CDCl<sub>3</sub>

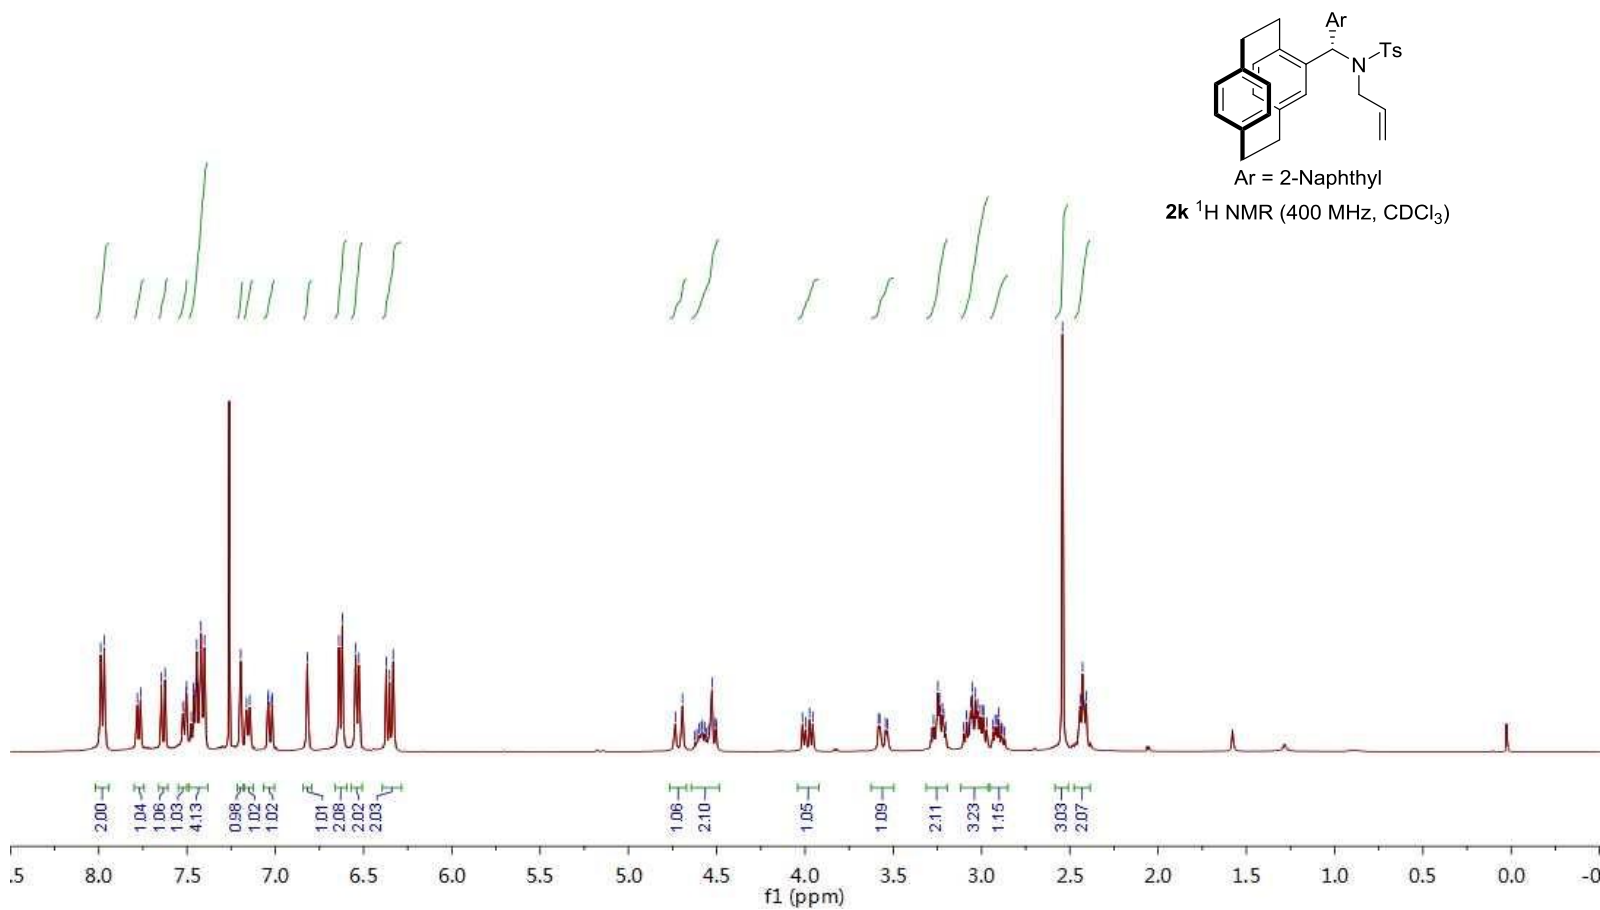

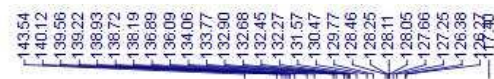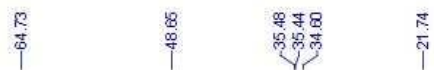

$^{13}\text{C}$  NMR YZ-4-68TM in  $\text{CDCl}_3$

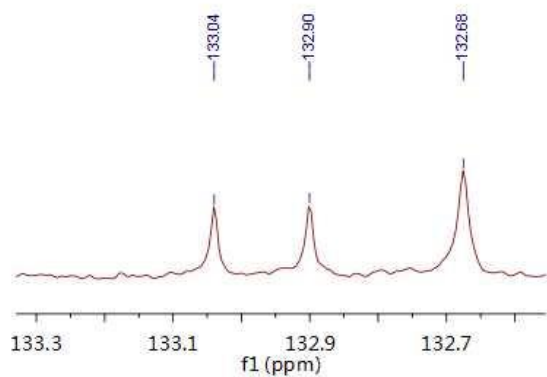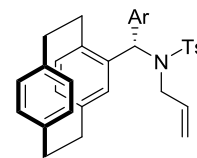

Ar = 2-Naphthyl

**2k**  $^{13}\text{C}$  NMR (100 MHz,  $\text{CDCl}_3$ )

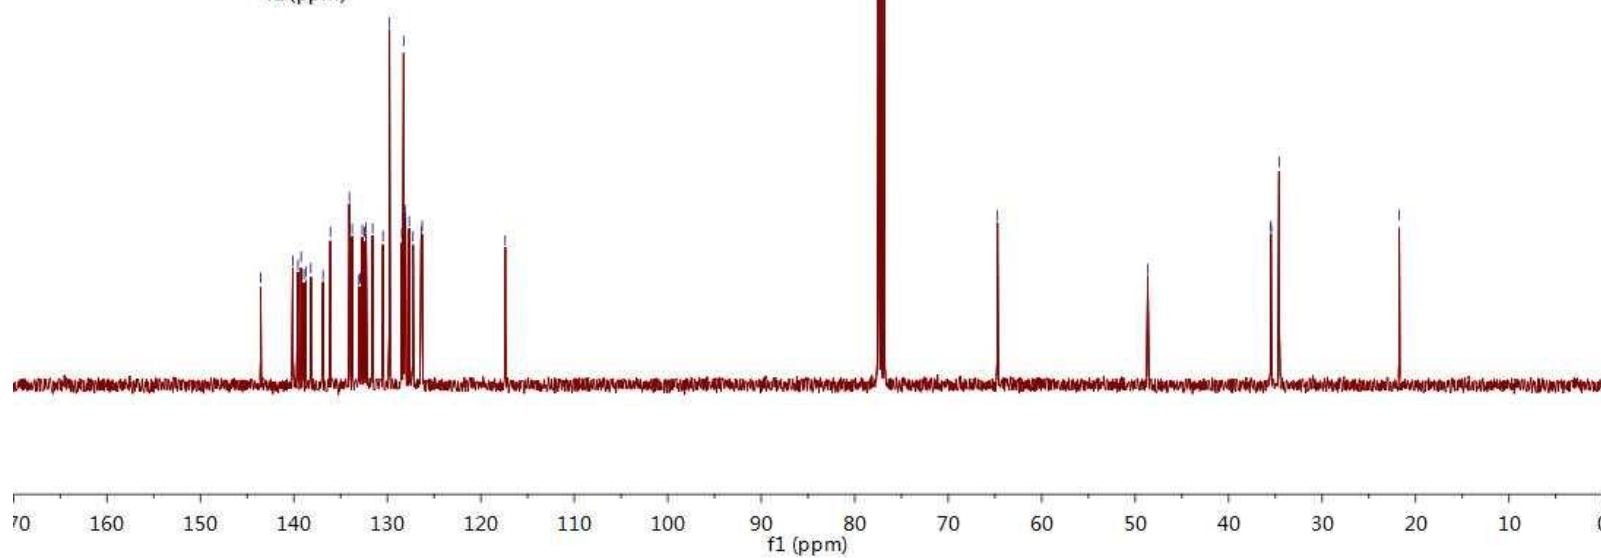

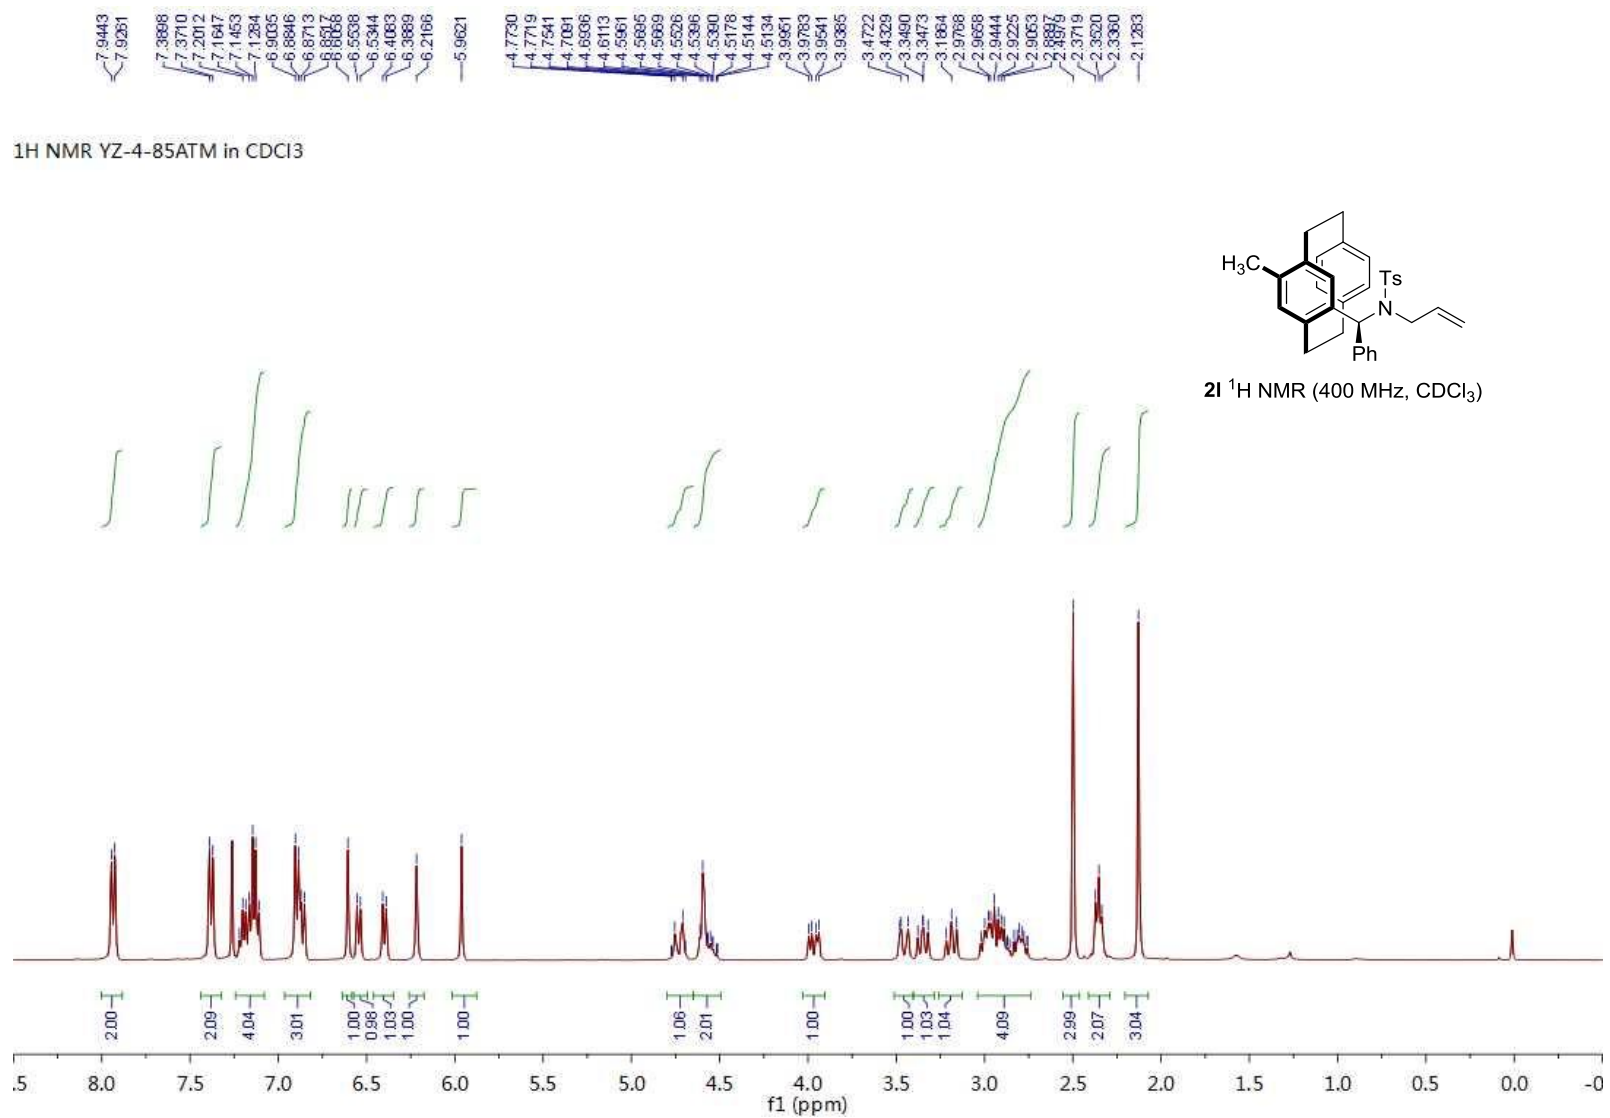

143.44  
141.09  
139.18  
139.00  
138.94  
138.45  
138.17  
138.10  
136.62  
134.85  
134.15  
133.86  
132.63  
131.31  
130.79  
129.67  
129.41  
128.37  
128.19  
127.97  
127.83  
117.15

64.51

48.43

34.25

34.03

33.61

33.40

21.72

19.83

$^{13}\text{C}$  NMR YZ-4-85ATM in  $\text{CDCl}_3$

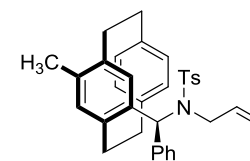

**2I**  $^{13}\text{C}$  NMR (100 MHz,  $\text{CDCl}_3$ )

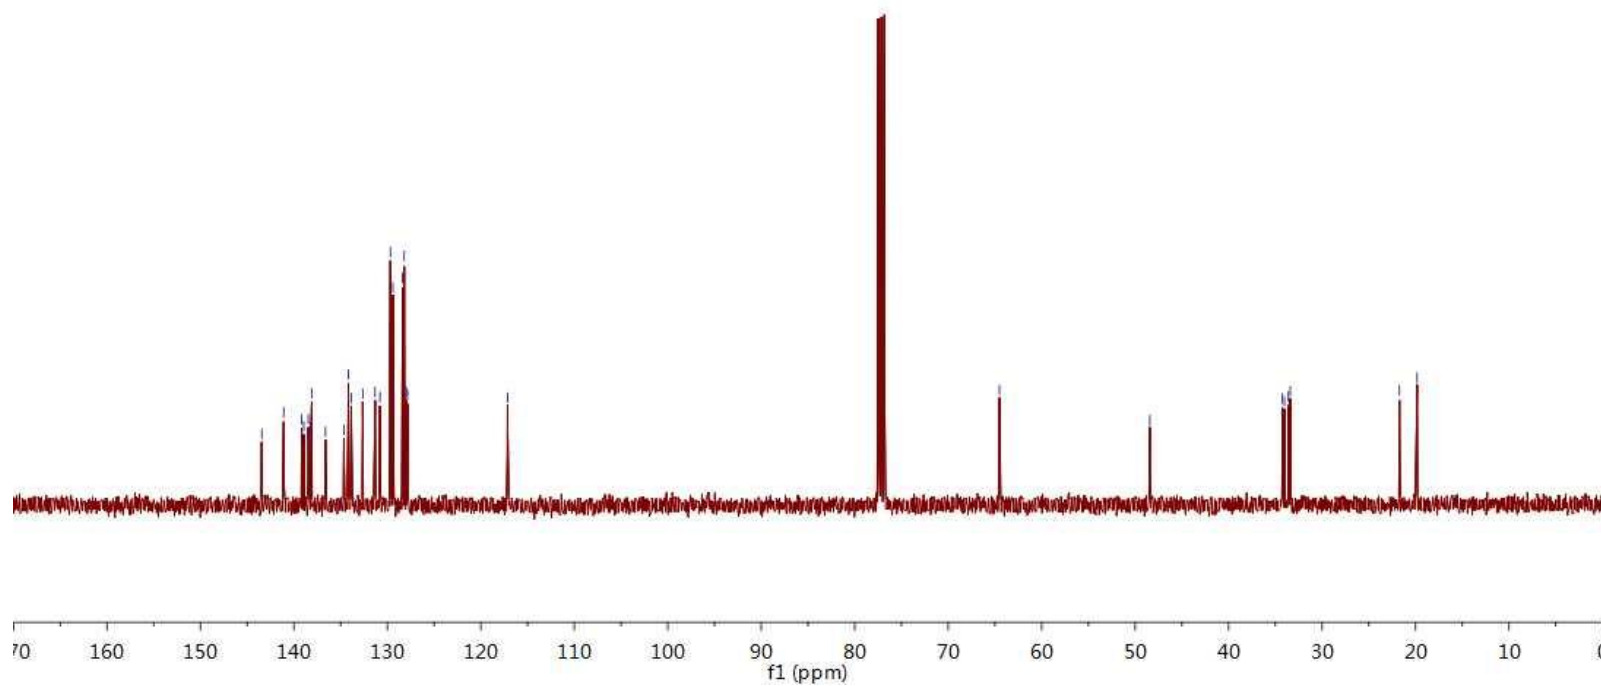

7.9263  
7.9061  
7.3684  
7.3762  
7.1170  
7.0859  
6.8457  
6.8246  
6.5902  
6.5006  
6.4971  
6.4064  
6.4024  
6.1790  
6.1581  
4.7680  
4.7566  
4.7440  
4.7375  
4.7314  
4.7204  
4.7136  
4.6957  
4.6851  
4.6710  
4.6513  
4.6365  
4.6163  
3.9873  
3.9729  
3.9449  
3.9311  
3.4365  
3.3382  
3.3316  
3.1703  
3.1422  
2.9454  
2.9378  
2.9279  
2.9217  
2.9051  
2.8974  
2.8904  
2.3696  
2.3483  
2.3353  
2.3279  
2.3153  
2.1169

<sup>1</sup>H NMR YZ-4-85BTM in CDCl<sub>3</sub>

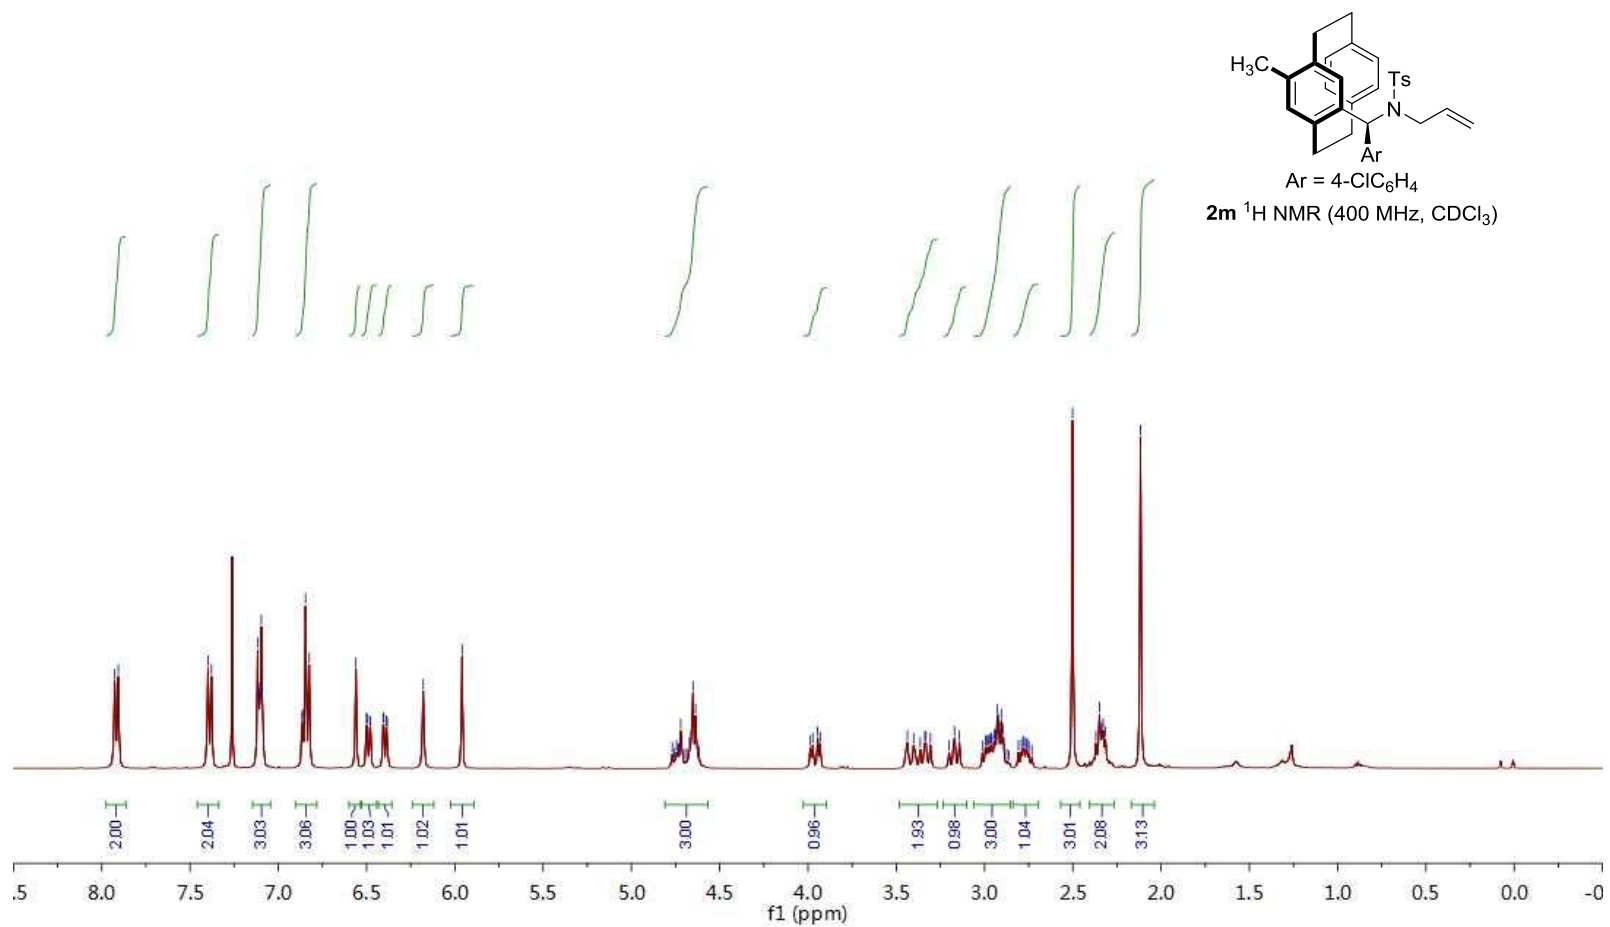

<sup>13</sup>C NMR YZ-4-85BTM in CDCl<sub>3</sub>

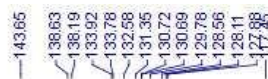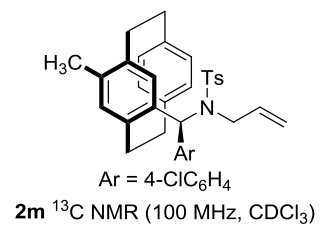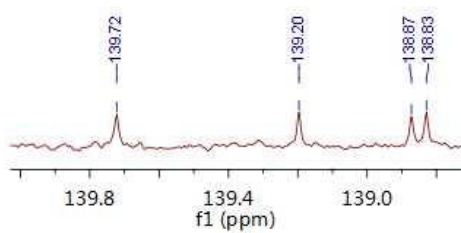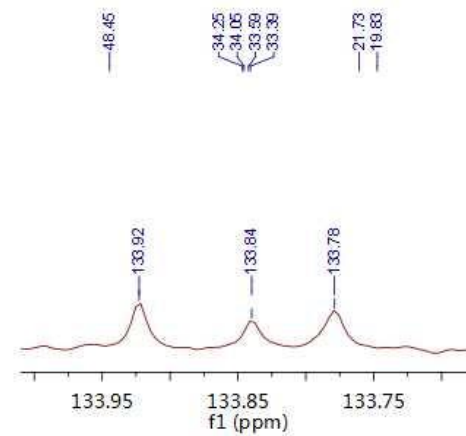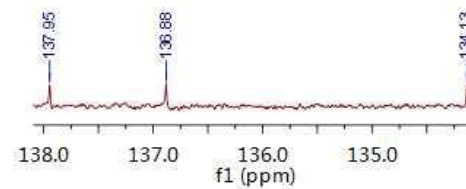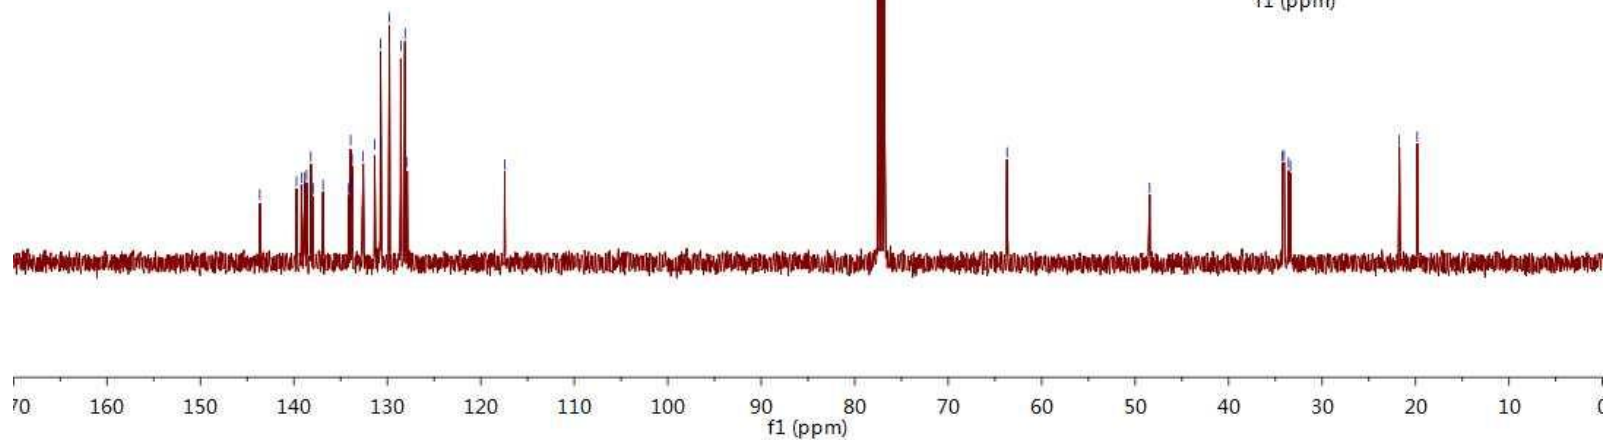



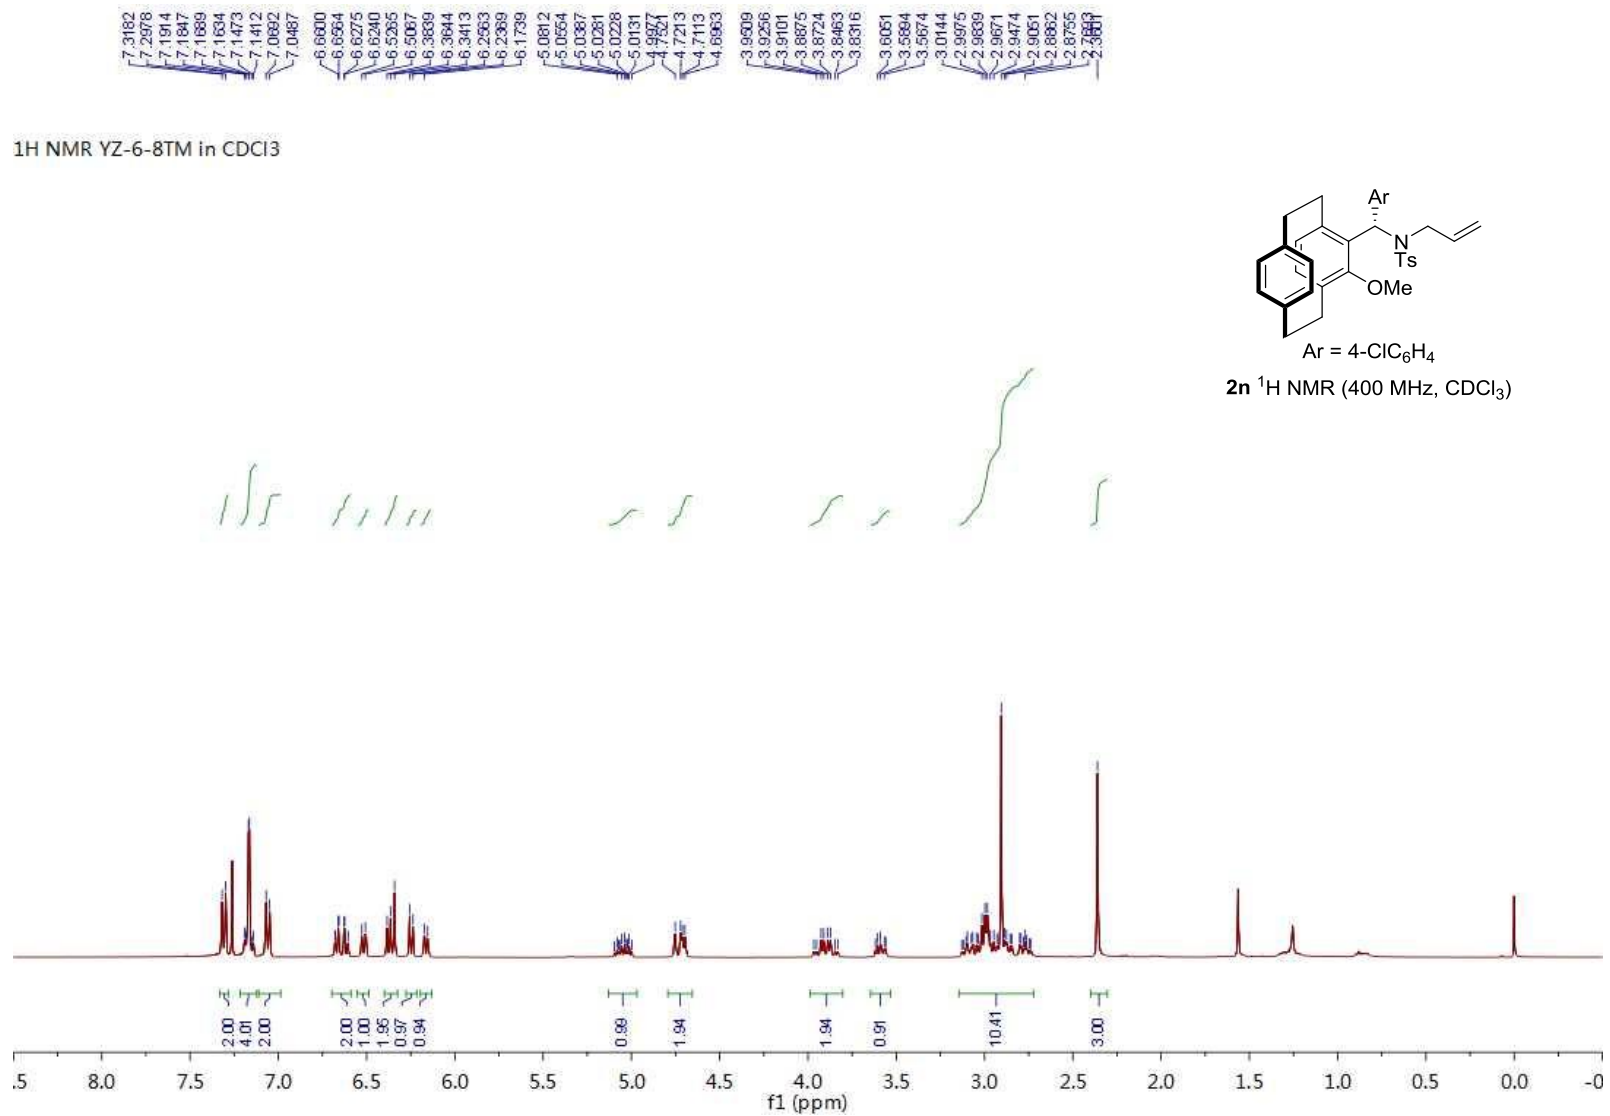

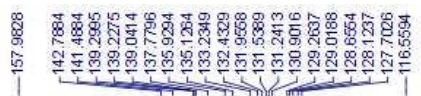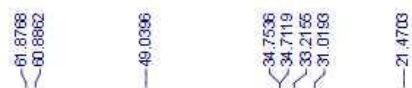

$^{13}\text{C}$  NMR YZ-6-8TM in  $\text{CDCl}_3$

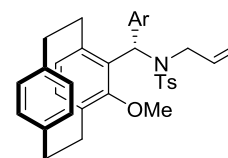

Ar = 4-ClC<sub>6</sub>H<sub>4</sub>

**2n**  $^{13}\text{C}$  NMR (100 MHz,  $\text{CDCl}_3$ )

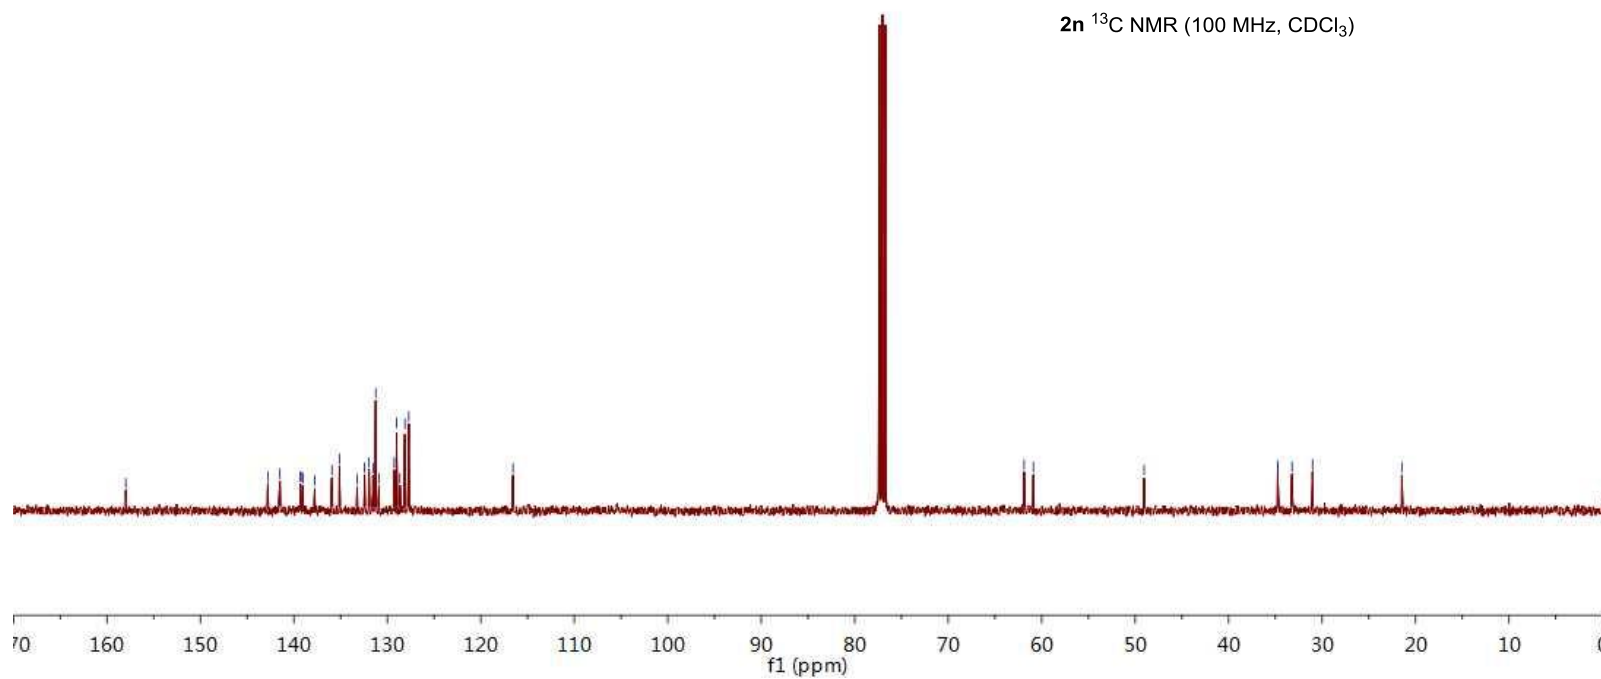

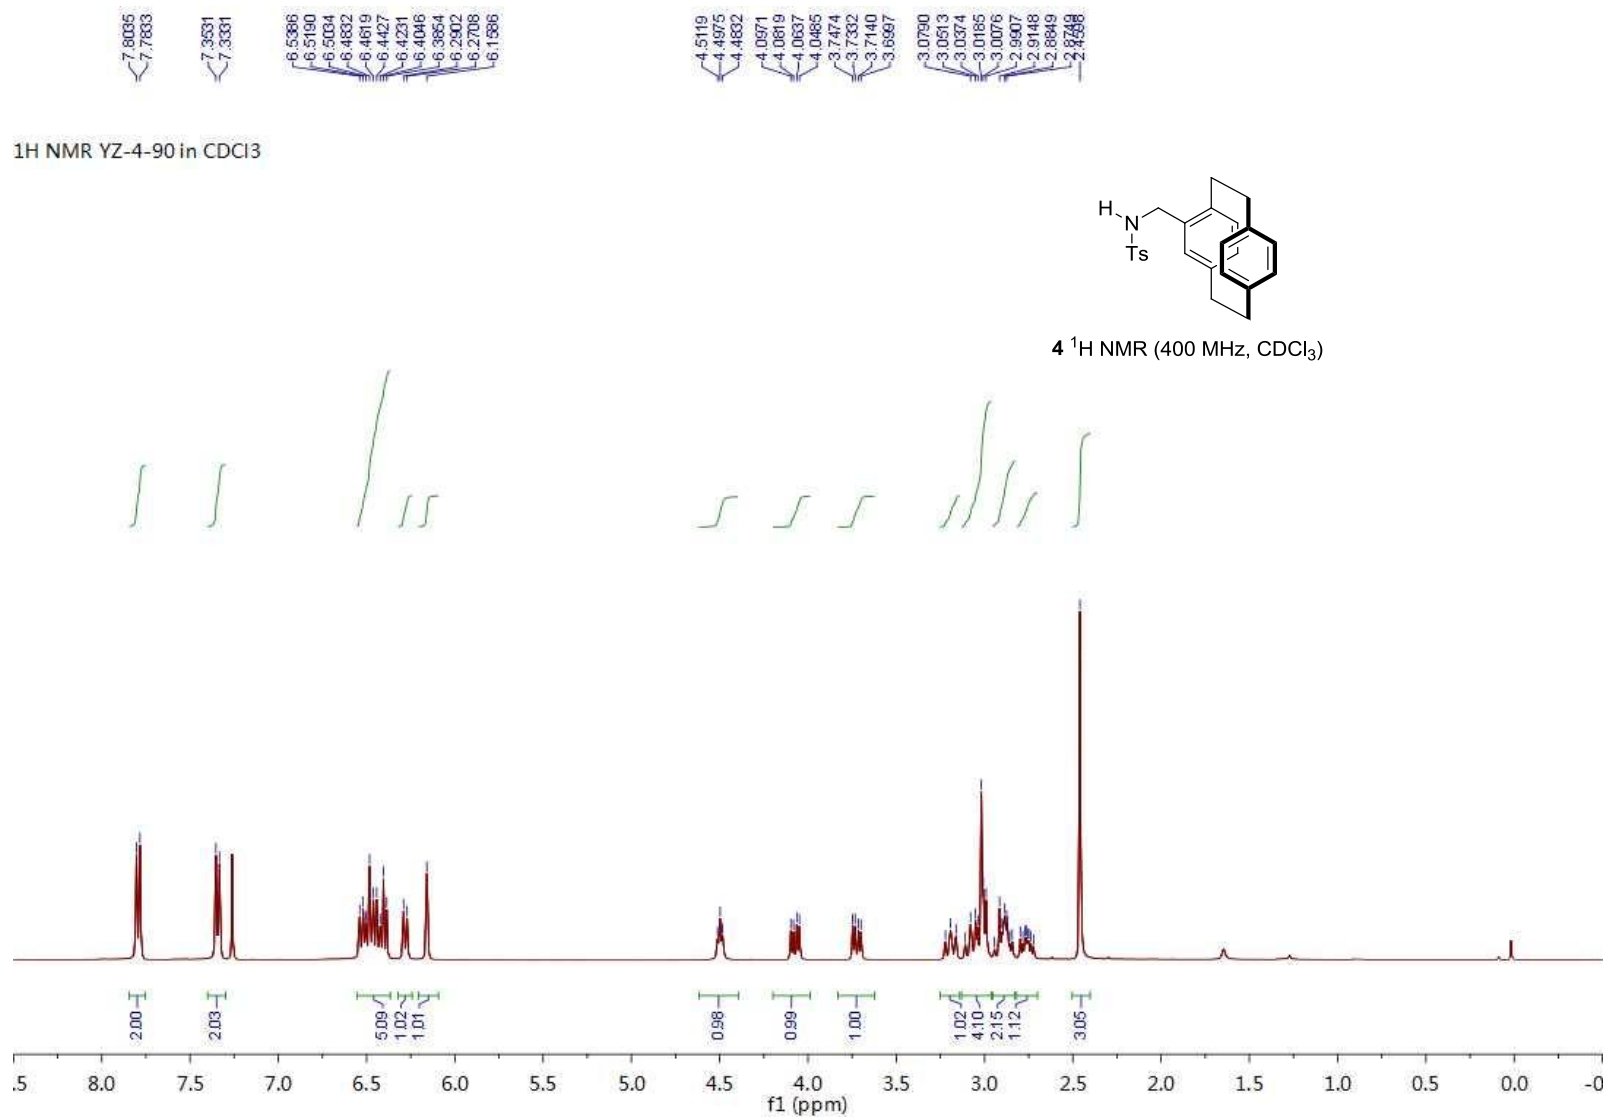

143.63  
140.43  
139.52  
139.20  
138.09  
136.69  
135.74  
135.16  
133.44  
133.43  
133.31  
132.44  
132.19  
129.85  
128.70  
127.31

46.28  
35.26  
34.94  
34.27  
32.94  
21.67

<sup>13</sup>C NMR YZ-4-90 in CDCl<sub>3</sub>

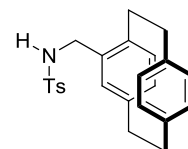

4 <sup>13</sup>C NMR (100 MHz, CDCl<sub>3</sub>)

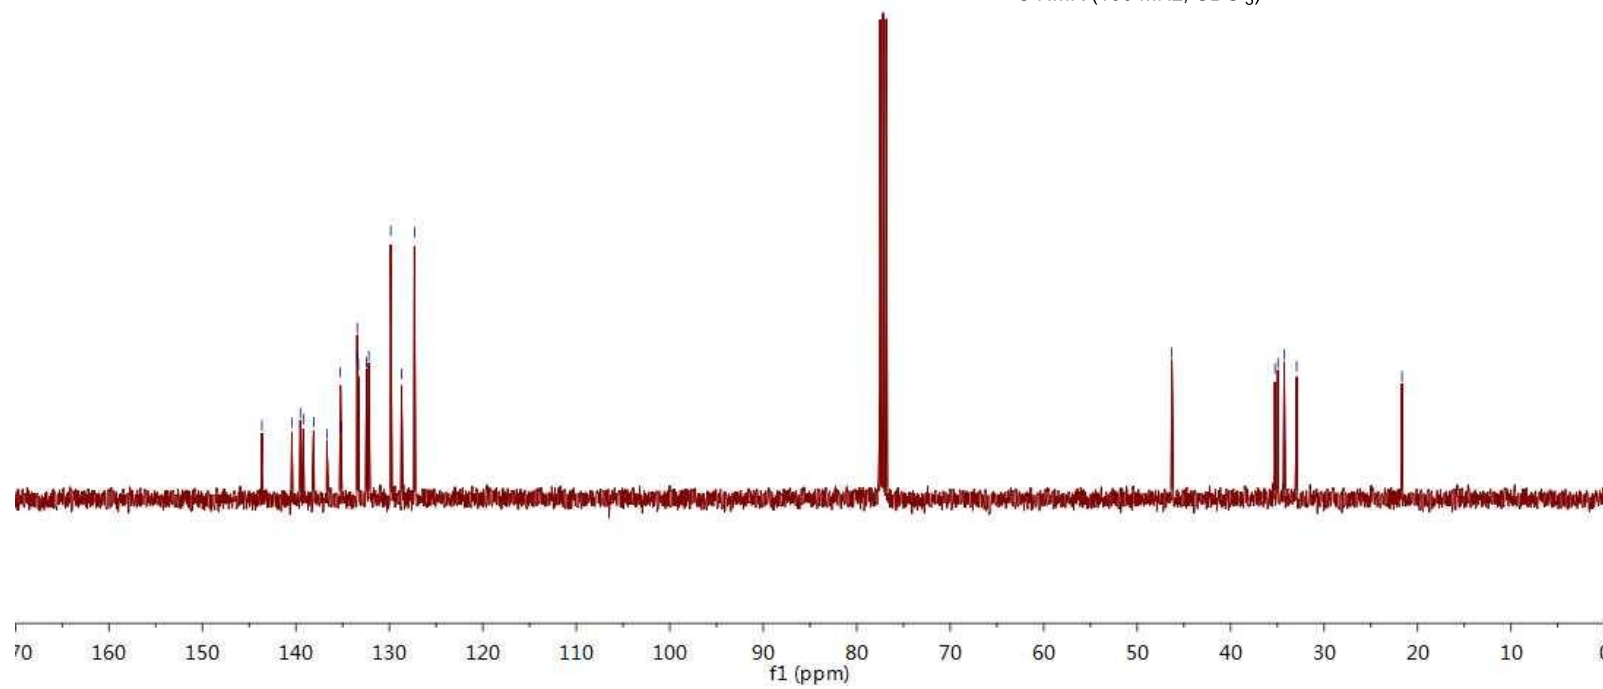

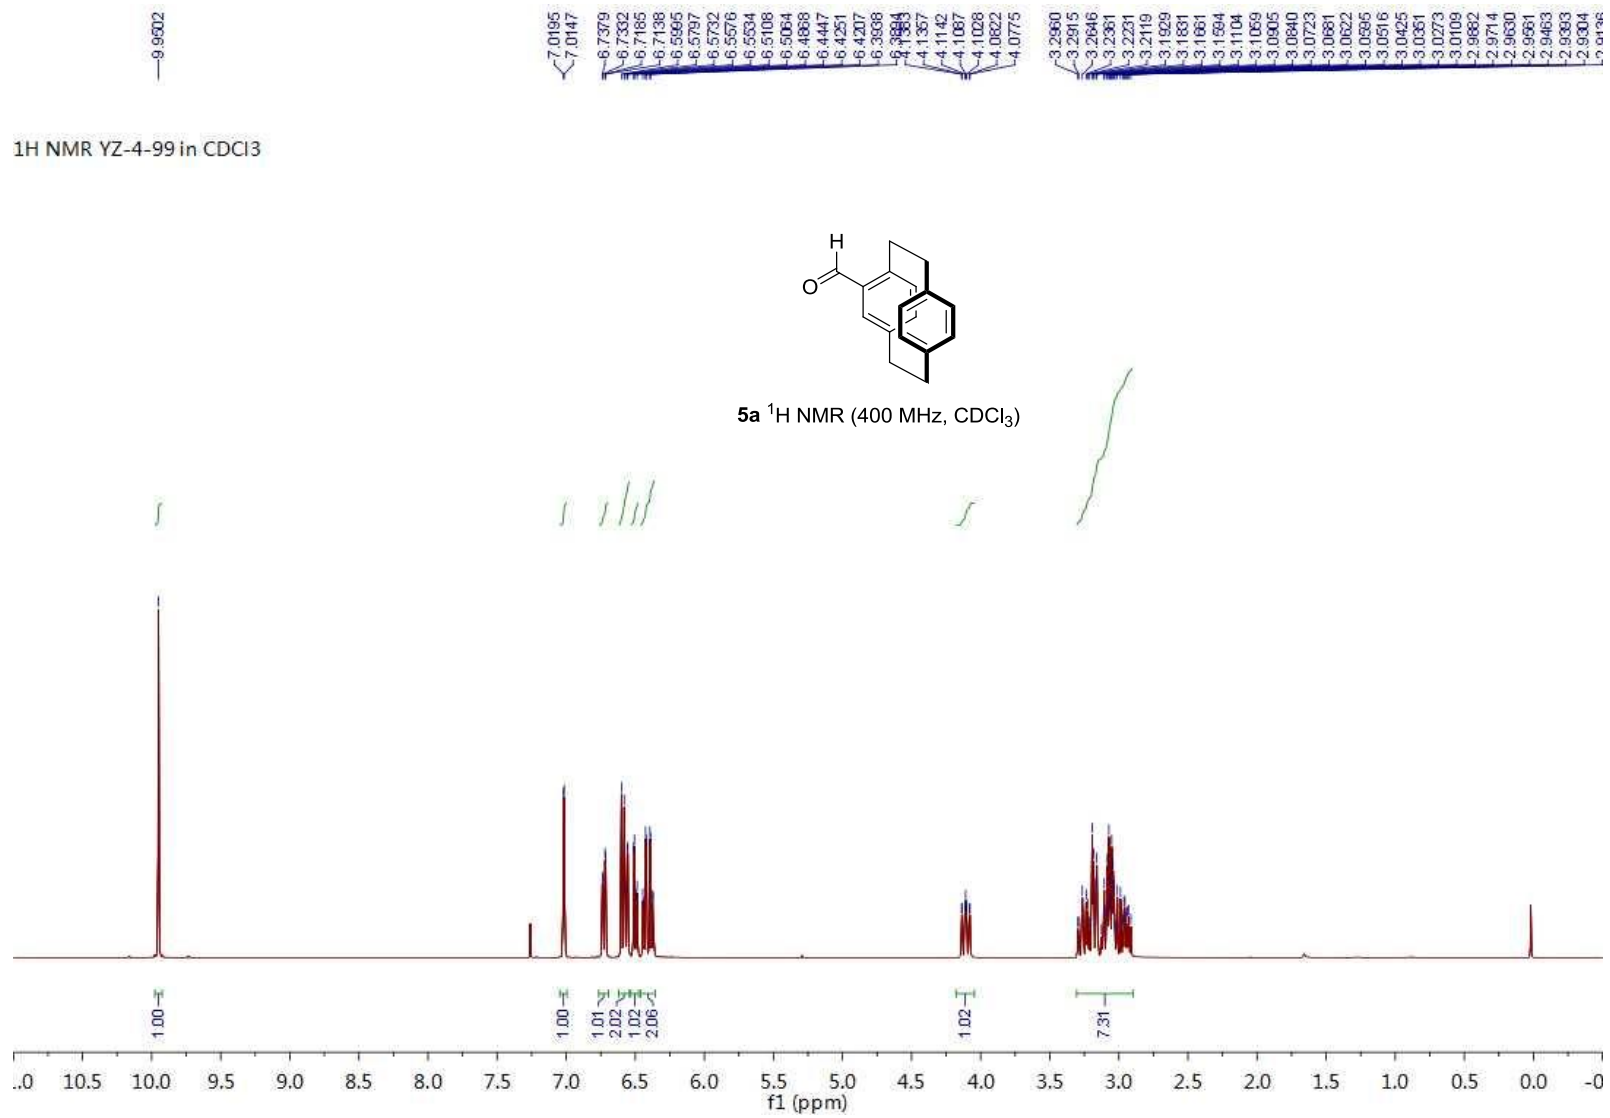

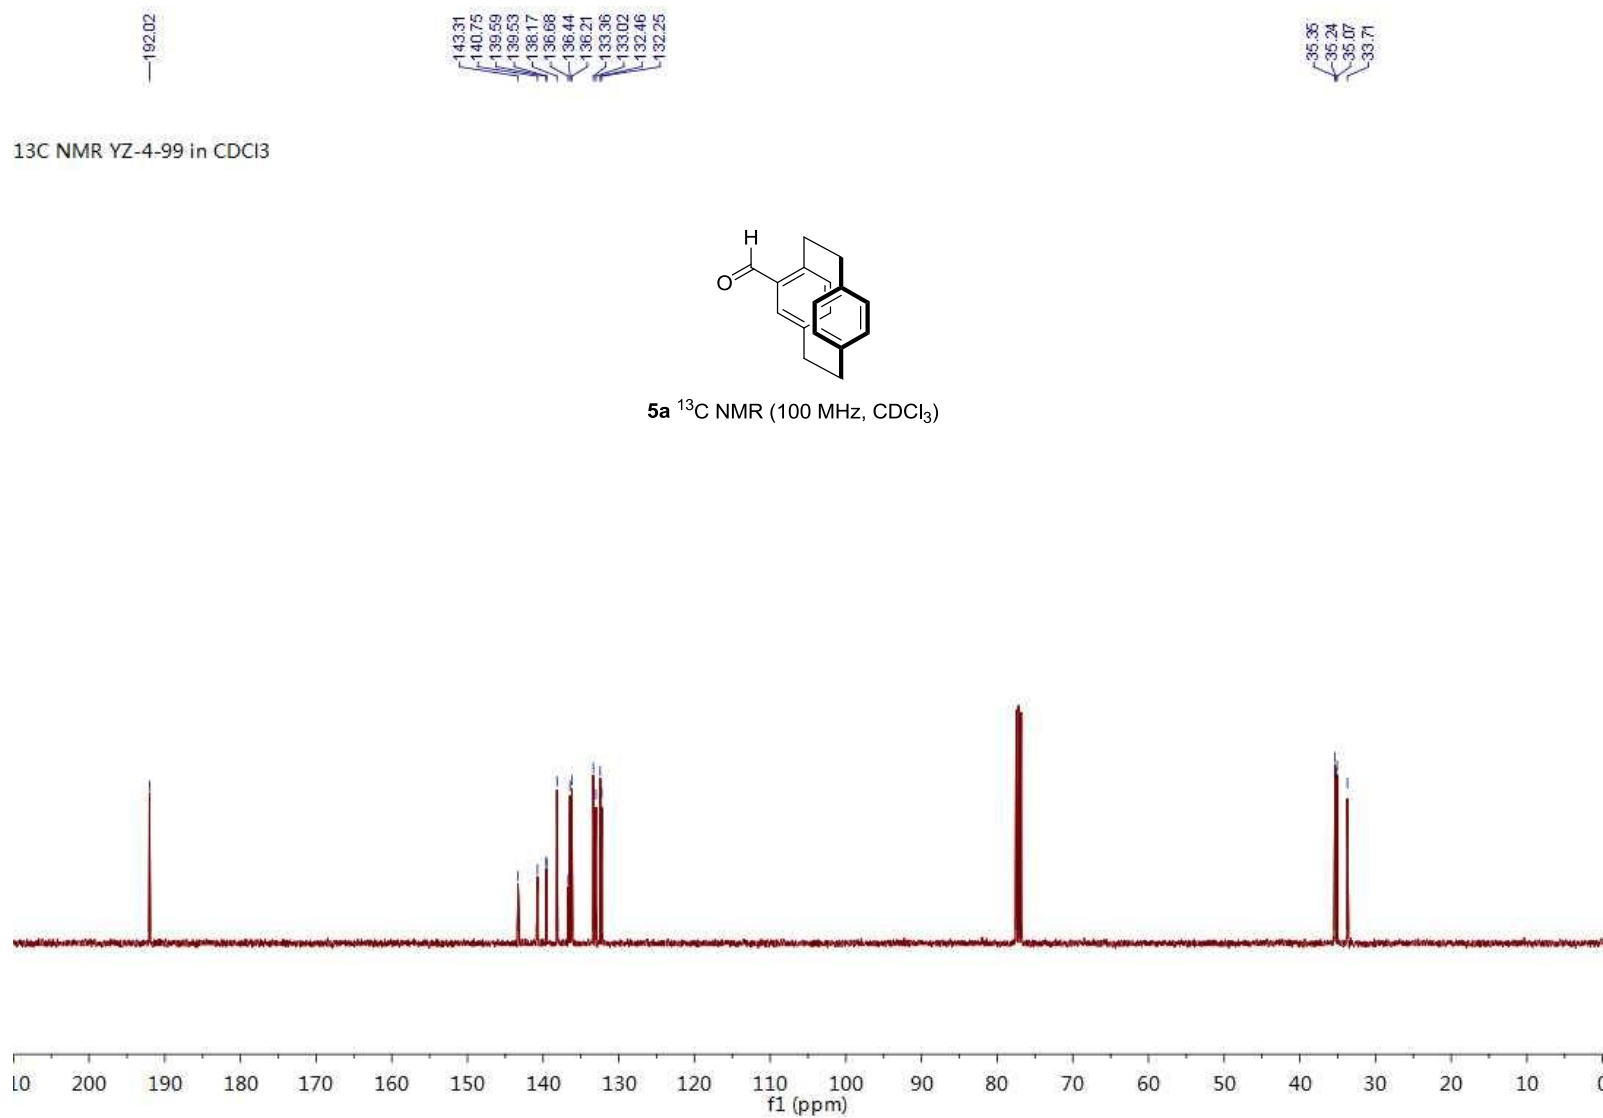

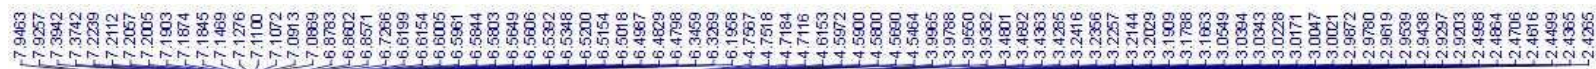

$^1\text{H}$  NMR YZ-4-89 in  $\text{CDCl}_3$

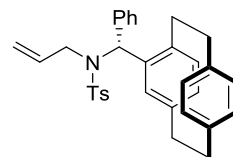

(-)-**2a**  $^1\text{H}$  NMR (400 MHz,  $\text{CDCl}_3$ )

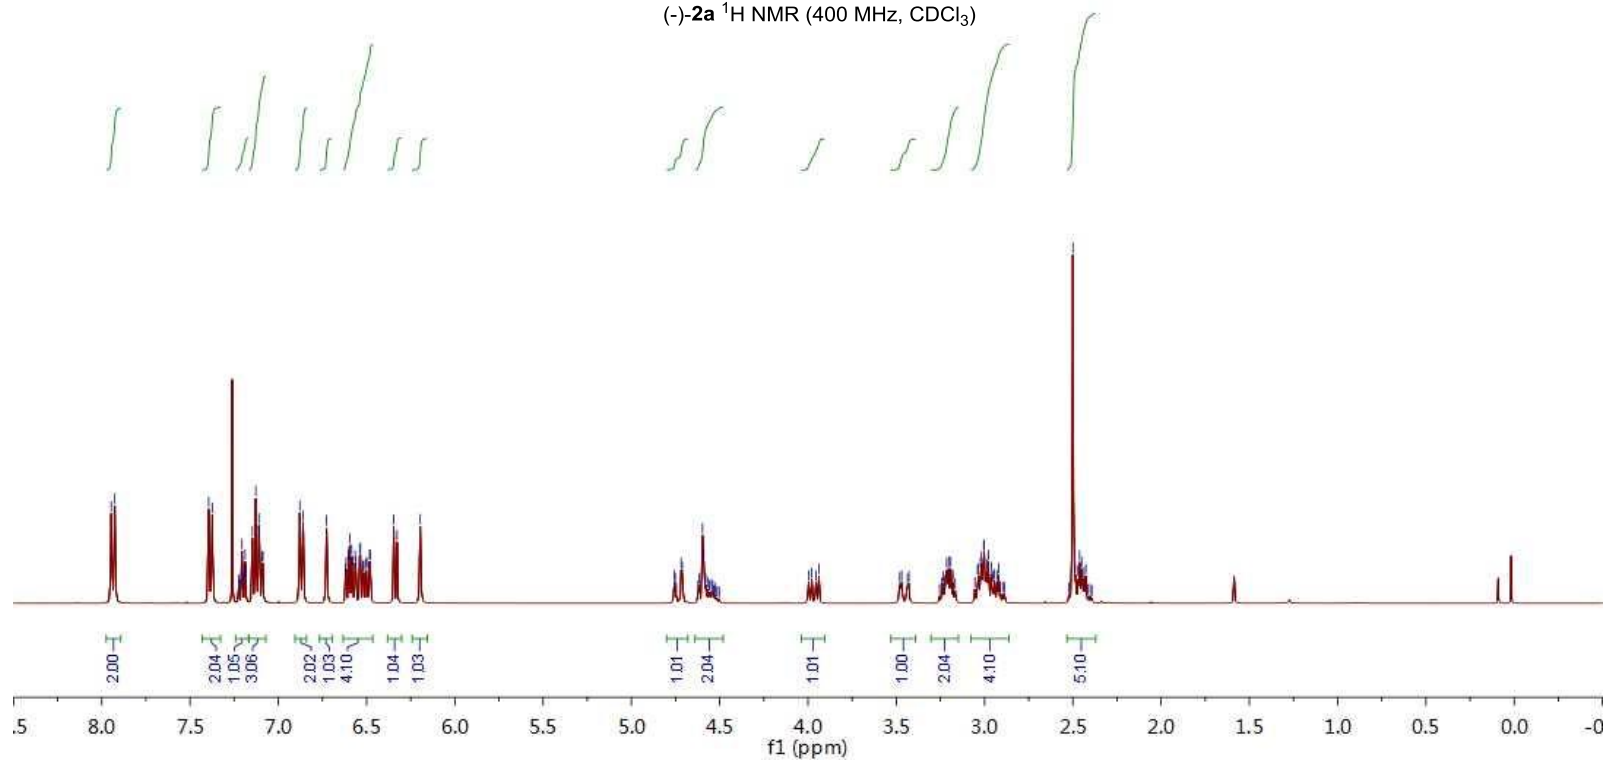

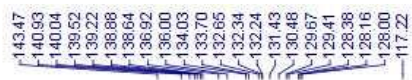

$^{13}\text{C}$  NMR YZ-4-89 in  $\text{CDCl}_3$

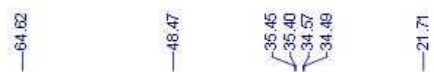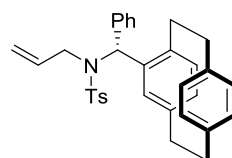

(-)-**2a**  $^{13}\text{C}$  NMR (100 MHz,  $\text{CDCl}_3$ )

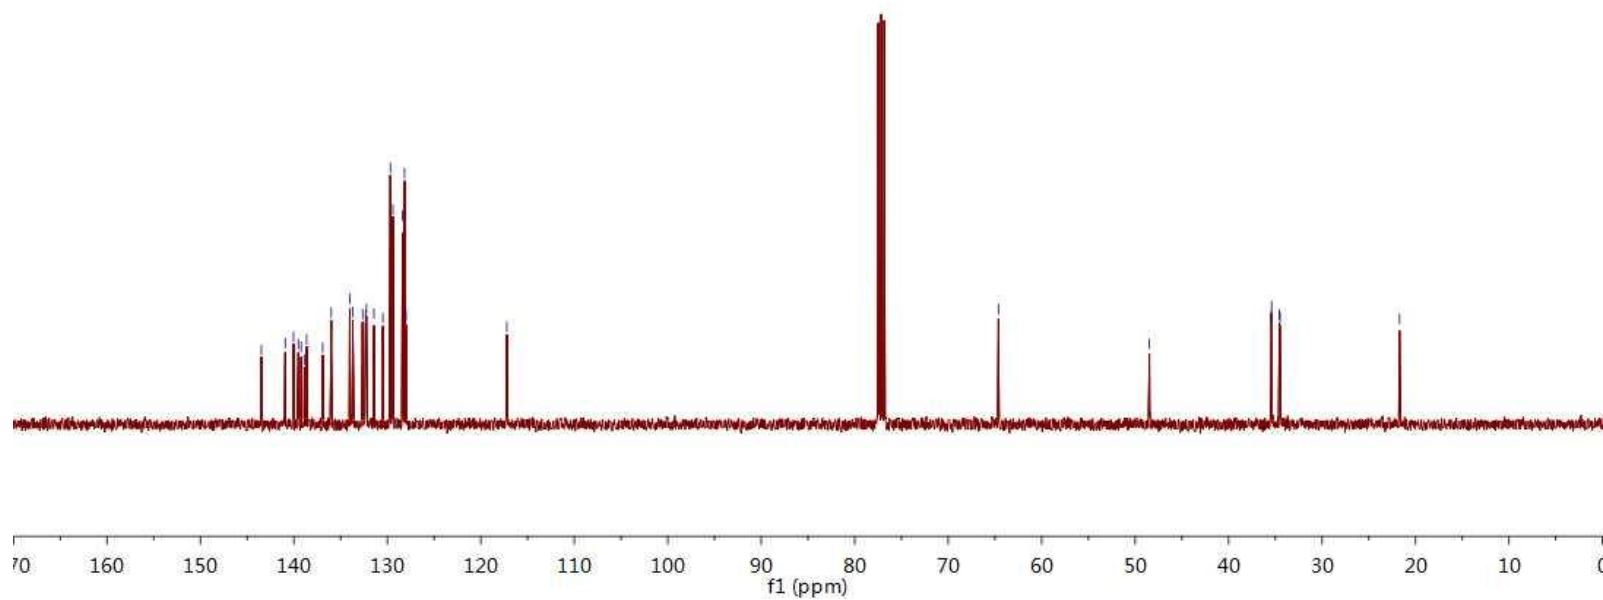



7.8762  
7.8683  
7.3719  
7.3518  
7.0647  
7.0451  
6.8424  
6.8166  
6.5973  
6.5755  
6.5568  
6.5208  
6.5018  
6.4247  
6.4013  
6.3813  
5.4064  
5.3823  
4.1663  
4.1215  
3.9970  
3.9602  
3.2845  
3.2615  
3.1265  
3.0716  
3.0564  
3.0247  
3.0150  
3.0078  
2.9966  
2.9843  
2.9681  
2.4324  
2.4173  
2.4063  
2.4003  
2.3966  
2.2170  
2.1764

<sup>1</sup>H NMR YZ-4-97 in CDCl<sub>3</sub>

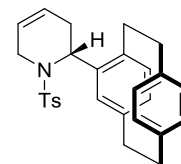

6 <sup>1</sup>H NMR (400 MHz, CDCl<sub>3</sub>)

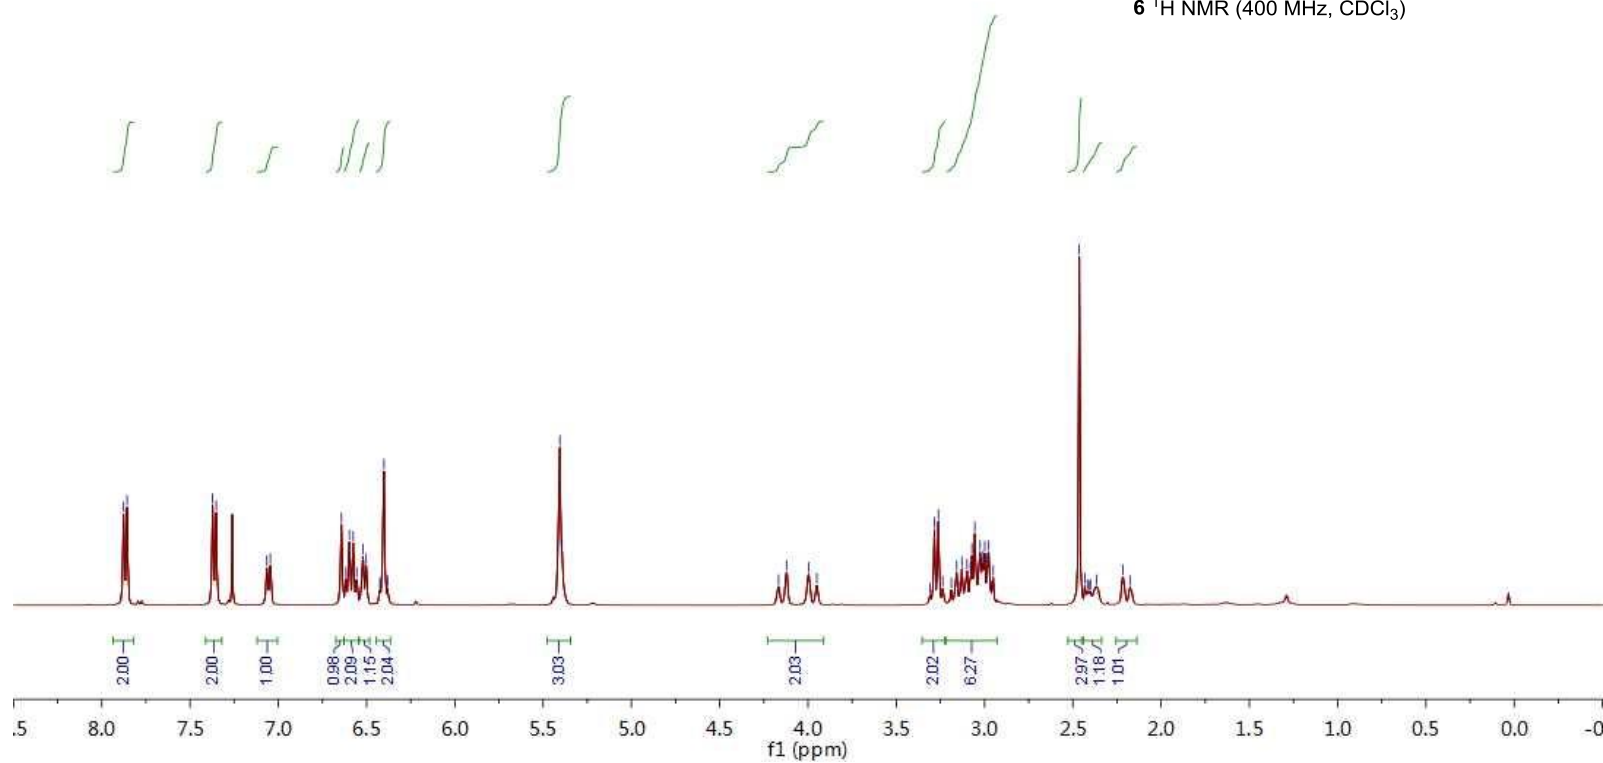

143.37  
140.01  
139.88  
139.45  
139.04  
137.82  
135.98  
135.89  
133.44  
132.51  
132.27  
131.05  
129.86  
129.70  
127.12  
123.21  
122.11

52.15  
42.13  
35.32  
34.92  
33.82  
31.22  
21.63

<sup>13</sup>C NMR YZ-4-97 in CDCl<sub>3</sub>

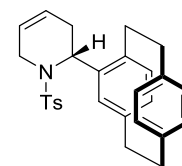

**6** <sup>13</sup>C NMR (100 MHz, CDCl<sub>3</sub>)

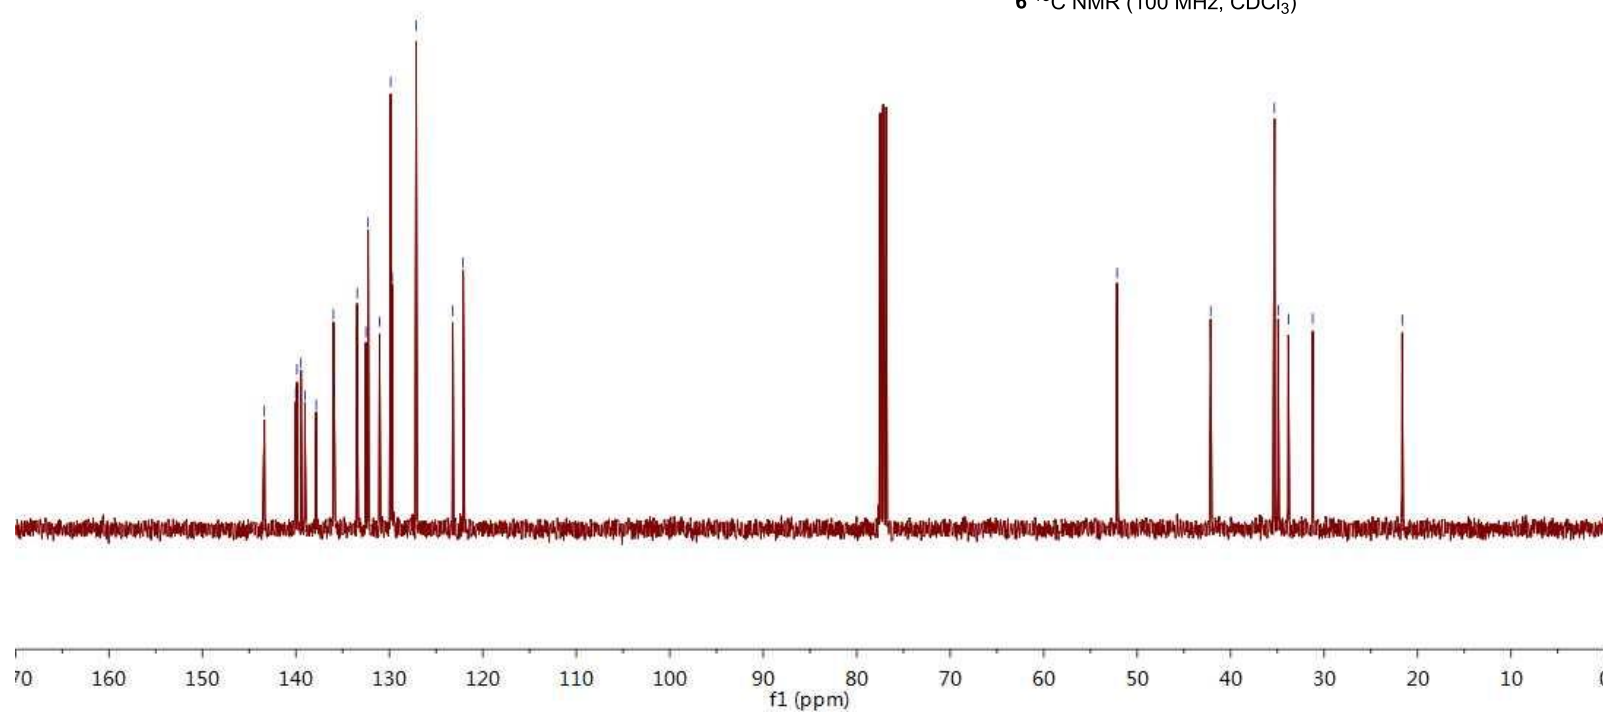

7.2363  
7.2156  
7.1998  
7.1627  
7.1472  
7.1306  
6.8776  
6.6414  
6.6222  
6.5581  
6.5361  
6.5152  
6.4832  
6.4597  
6.4442  
6.4405  
6.3987  
6.3887  
5.3823  
5.3428  
5.3364  
5.2867  
5.2612  
4.7847  
3.3622  
3.3785  
3.3552  
3.3475  
3.3011  
3.2840  
3.1905  
3.1645  
3.1564  
3.1328  
3.1201  
3.1134  
3.1018  
3.0932  
3.0833  
3.0730  
3.0693  
2.7362  
2.7160  
2.7085  
2.6869  
2.6919  
2.6825  
2.6858

<sup>1</sup>H NMR YZ-5-4 in CDCl<sub>3</sub>

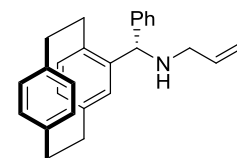

7 <sup>1</sup>H NMR (400 MHz, CDCl<sub>3</sub>)

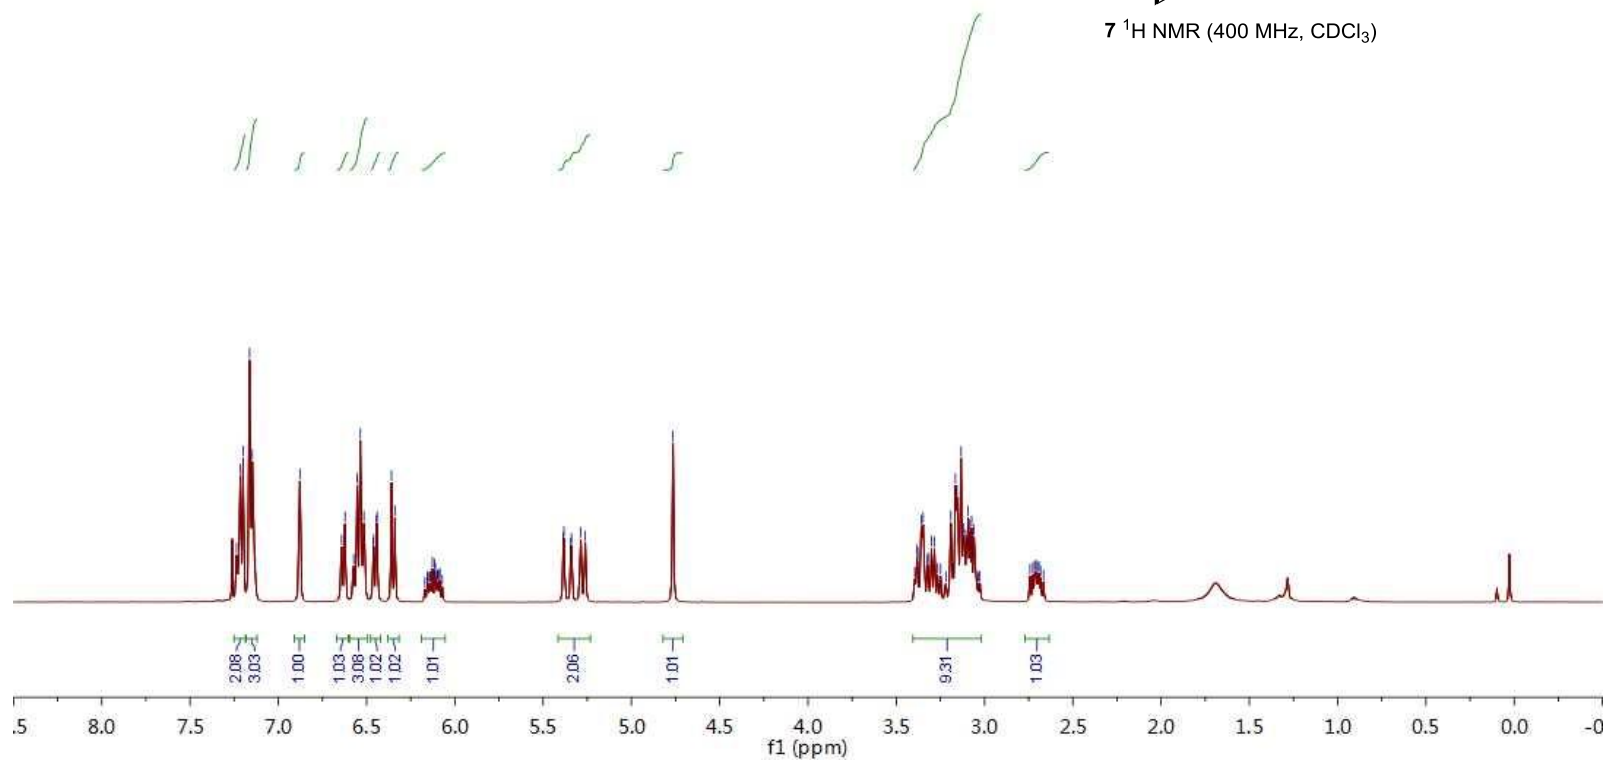

<sup>13</sup>C NMR YZ-5-4 in CDCl<sub>3</sub>

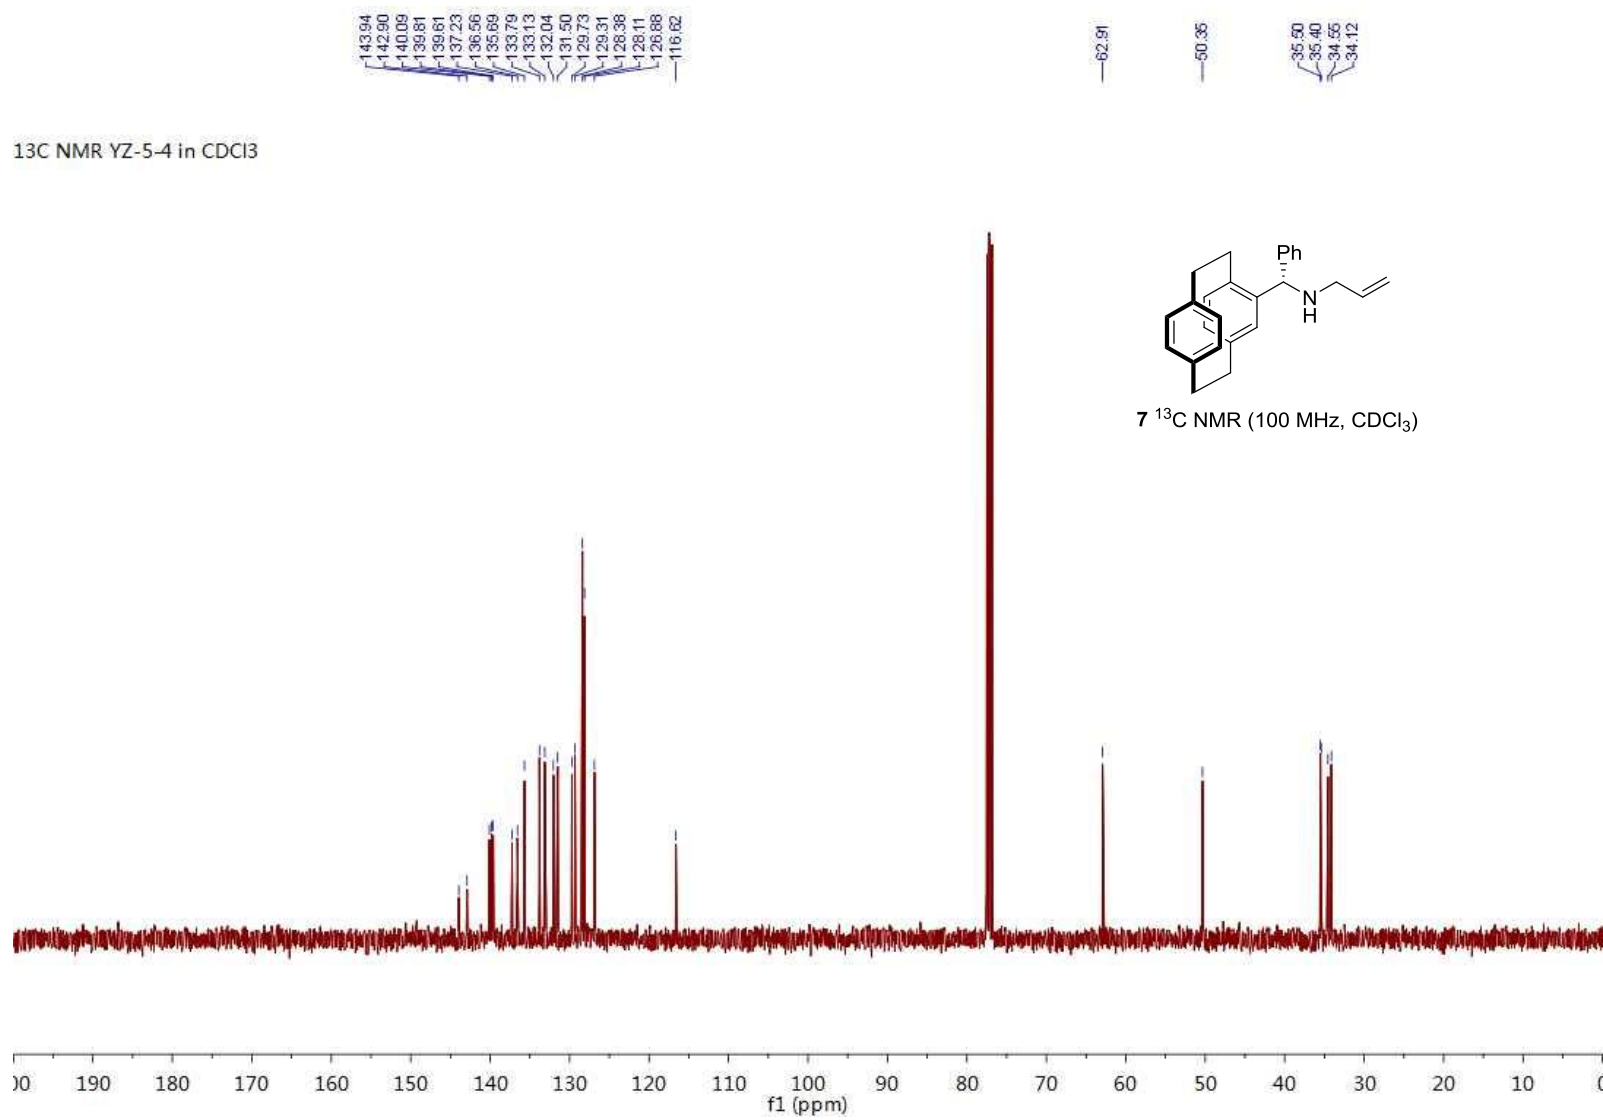

Data File C:\CHEM32\1\DATA\ZHOU2019\SIG1003079.D  
 Sample Name: YZ-4-585M(RAC)

```

=====
Acq. Operator   :
Acq. Instrument : 仪器 1                Location : Vial 1
Injection Date  : 5/30/19 9:38:00
                                           Inj Volume : 5.000 µl

Acq. Method    : C:\CHEM32\1\METHODS\DEF_LC11.M
Last changed   : 5/30/19 9:07:37
                (modified after loading)
Analysis Method : C:\CHEM32\1\METHODS\DEF_LC11.M
Last changed   : 5/30/19 10:07:23
                (modified after loading)
Sample Info    : AD-3, n-hexane/i-PrOH = 80/20, 0.8 mL/min, 30 oC, 254 n
                m
  
```

Additional Info : Peak(s) manually integrated  
 VWDL A, Wavelength=254nm (ZHOU2019\SIG1003079.D)

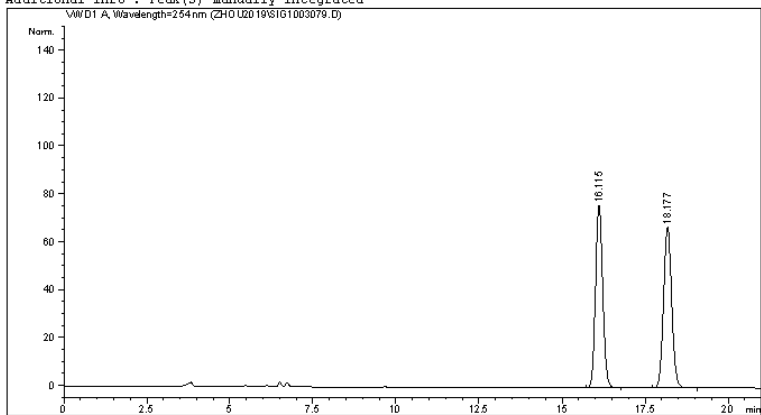

Area Percent Report

```

Sorted By      :      Signal
Multiplier:    :      1.0000
Dilution:      :      1.0000
Use Multiplier & Dilution Factor with ISTDs
  
```

Signal 1: VWDL A, Wavelength=254 nm

| Peak # | RetTime [min] | Type | Width [min] | Area [mAU*s] | Height [mAU] | Area %  |
|--------|---------------|------|-------------|--------------|--------------|---------|
| 1      | 16.115        | BV   | 0.2366      | 1152.96143   | 76.14727     | 49.9519 |
| 2      | 18.177        | VB   | 0.2685      | 1155.18225   | 67.21445     | 50.0481 |

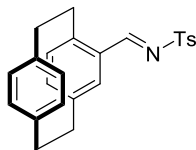

Data File C:\CHEM32\1\DATA\ZHOU2019\SIG1002434.D  
 Sample Name: YZ-4-58B

```

=====
Acq. Operator   :
Acq. Instrument : 仪器 1                Location : Vial 91
Injection Date  : 1/12/19 13:53:08
                                           Inj Volume : 5.000 µl

Acq. Method    : C:\CHEM32\1\METHODS\DEF_LC11.M
Last changed   : 1/12/19 13:05:18
                (modified after loading)
Analysis Method : C:\CHEM32\1\METHODS\DEF_LC11.M
Last changed   : 5/30/19 8:44:40
                (modified after loading)
Sample Info    : AD-3, n-hexane/i-PrOH = 80/20, 0.8 mL/min, 30 oC, 254 n
                m
  
```

Additional Info : Peak(s) manually integrated  
 VWDL A, Wavelength=254nm (ZHOU2019\SIG1002434.D)

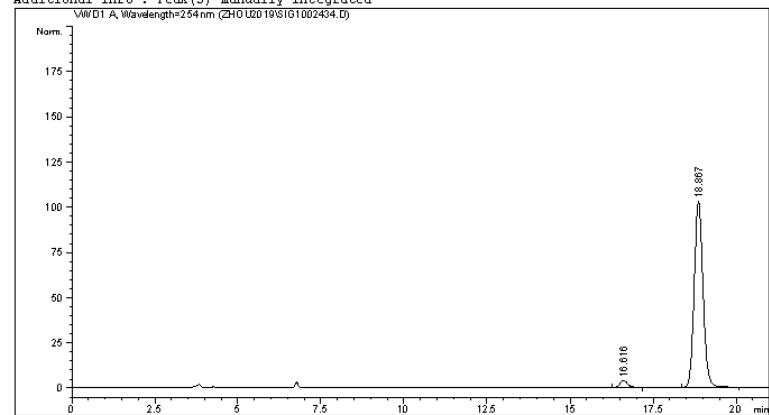

Area Percent Report

```

Sorted By      :      Signal
Multiplier:    :      1.0000
Dilution:      :      1.0000
Use Multiplier & Dilution Factor with ISTDs
  
```

Signal 1: VWDL A, Wavelength=254 nm

| Peak # | RetTime [min] | Type | Width [min] | Area [mAU*s] | Height [mAU] | Area %  |
|--------|---------------|------|-------------|--------------|--------------|---------|
| 1      | 16.616        | VB   | 0.2488      | 61.41887     | 3.79507      | 3.1303  |
| 2      | 18.867        | BB   | 0.2875      | 1900.67249   | 102.88990    | 96.8697 |

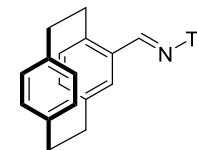

Kinetic resolution  
 from PhB(OH)<sub>2</sub>

Data File C:\CHEM32\1\DATA\ZHOU2019\SIG1002465.D  
 Sample Name: YZ-4-60A

```

=====
Acq. Operator   :
Acq. Instrument : 仪器 1                Location : Vial 91
Injection Date  : 1/15/19 14:13:25
                                           Inj Volume : 5.000 µl

Acq. Method    : C:\CHEM32\1\METHODS\DEF_LC11.M
Last changed   : 1/15/19 13:26:04
                (modified after loading)
Analysis Method: C:\CHEM32\1\METHODS\DEF_LC11.M
Last changed   : 5/30/19 10:10:26
                (modified after loading)
Sample Info    : AD-3, n-hexane/i-PrOH = 80/20, 0.8 mL/min, 30 oC, 254 n
                m
  
```

Additional Info : Peak(s) manually integrated  
 VWDL A, Wavelength=254nm (ZHOU2019\SIG1002465.D)

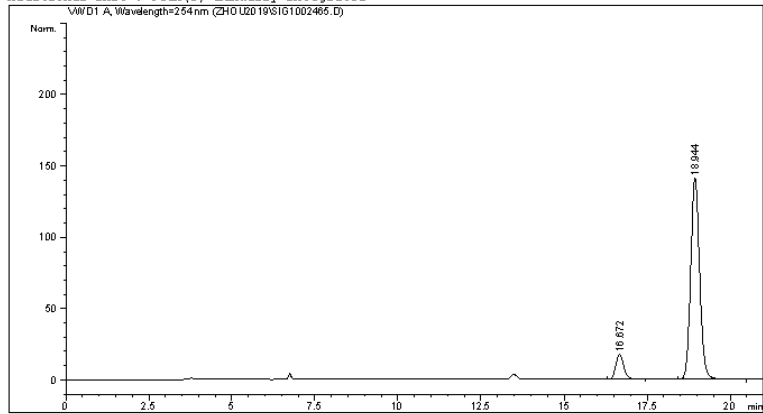

Area Percent Report

```

Sorted By      :      Signal
Multiplier:    :      1.0000
Dilution:      :      1.0000
Use Multiplier & Dilution Factor with ISTDs
  
```

Signal 1: VWDL A, Wavelength=254 nm

| Peak # | RetTime [min] | Type | Width [min] | Area [mAU*s] | Height [mAU] | Area %  |
|--------|---------------|------|-------------|--------------|--------------|---------|
| 1      | 16.672        | BB   | 0.2563      | 293.14850    | 17.42010     | 9.9678  |
| 2      | 18.944        | BB   | 0.2912      | 2647.81104   | 140.90161    | 90.0322 |

仪器 1 5/30/19 10:10:32

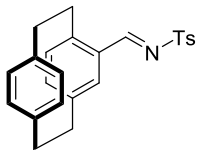

**(-)-1a**  
 Kinetic resolution  
 from 2-MeC<sub>6</sub>H<sub>4</sub>B(OH)<sub>2</sub>

Page 1 of 2

Data File C:\CHEM32\1\DATA\ZHOU2019\SIG1002469.D  
 Sample Name: YZ-4-60B

```

=====
Acq. Operator   :
Acq. Instrument : 仪器 1                Location : Vial 91
Injection Date  : 1/15/19 22:43:10
                                           Inj Volume : 5.000 µl

Acq. Method    : C:\CHEM32\1\METHODS\DEF_LC11.M
Last changed   : 1/15/19 22:40:46
                (modified after loading)
Analysis Method: C:\CHEM32\1\METHODS\DEF_LC11.M
Last changed   : 5/30/19 9:51:56
                (modified after loading)
Sample Info    : AD-3, n-hexane/i-PrOH = 80/20, 0.8 mL/min, 30 oC, 254 n
                m
  
```

Additional Info : Peak(s) manually integrated  
 VWDL A, Wavelength=254nm (ZHOU2019\SIG1002469.D)

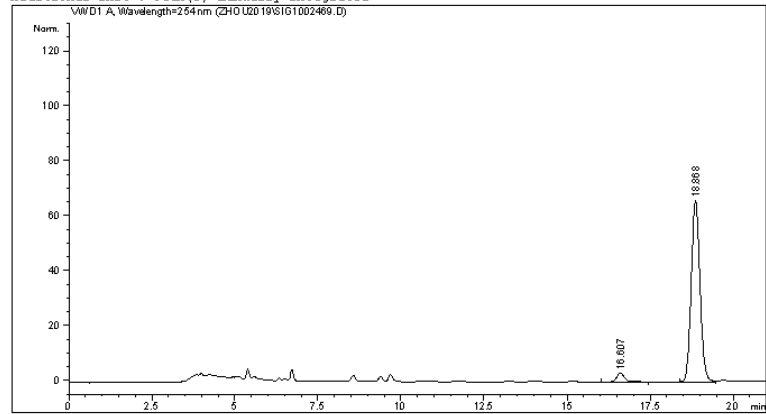

Area Percent Report

```

Sorted By      :      Signal
Multiplier:    :      1.0000
Dilution:      :      1.0000
Use Multiplier & Dilution Factor with ISTDs
  
```

Signal 1: VWDL A, Wavelength=254 nm

| Peak # | RetTime [min] | Type | Width [min] | Area [mAU*s] | Height [mAU] | Area %  |
|--------|---------------|------|-------------|--------------|--------------|---------|
| 1      | 16.607        | VB   | 0.2640      | 56.11112     | 3.20973      | 4.4128  |
| 2      | 18.868        | BV   | 0.2869      | 1215.42883   | 65.99891     | 95.5872 |

仪器 1 5/30/19 9:52:11

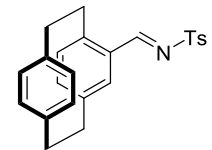

**(-)-1a**  
 Kinetic resolution  
 from 3-MeC<sub>6</sub>H<sub>4</sub>B(OH)<sub>2</sub>

Page 1 of 2

Data File C:\CHEM32\1\DATA\ZHOU2019\SIG1002527.D  
 Sample Name: YZ-4-62

```

=====
Acq. Operator   :
Acq. Instrument : 仪器 1                Location : Vial 1
Injection Date  : 1/22/19 16:30:41
                                           Inj Volume : 10.000 µl

Acq. Method    : C:\CHEM32\1\METHODS\DEF_LC11.M
Last changed   : 1/22/19 16:31:20
                (modified after loading)
Analysis Method : C:\CHEM32\1\METHODS\DEF_LC11.M
Last changed   : 5/30/19 10:18:44
                (modified after loading)
Sample Info    : AD-3, n-hexane/i-PrOH = 80/20, 0.8 mL/min, 30 oC, 254 nm
                m
  
```

Additional Info : Peak(s) manually integrated  
 VWDL A, Wavelength=254 nm (ZHOU2019\SIG1002527.D)

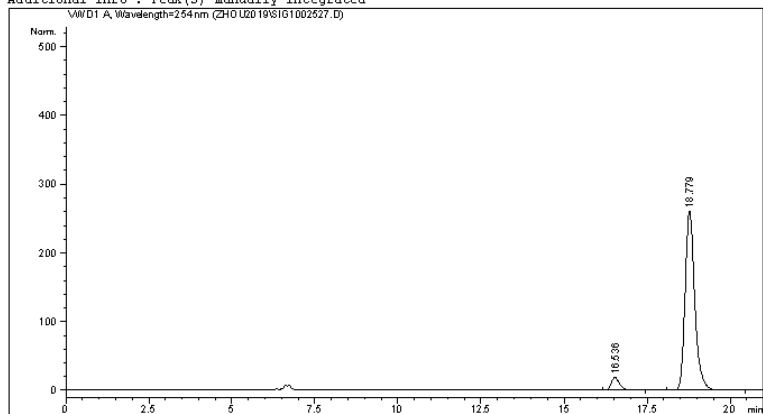

Area Percent Report

```

Sorted By      :      Signal
Multiplier:    :      1.0000
Dilution:      :      1.0000
Use Multiplier & Dilution Factor with ISTDs
  
```

Signal 1: VWDL A, Wavelength=254 nm

| Peak # | RetTime [min] | Type | Width [min] | Area [mAU*s] | Height [mAU] | Area %  |
|--------|---------------|------|-------------|--------------|--------------|---------|
| 1      | 16.536        | BB   | 0.2701      | 334.76022    | 18.94763     | 5.9673  |
| 2      | 18.779        | BB   | 0.3074      | 5275.15674   | 261.39069    | 94.0327 |

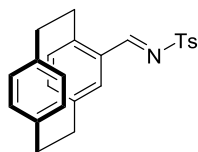

**(-)-1a**  
 Kinetic resolution  
 from 4-MeC<sub>6</sub>H<sub>4</sub>B(OH)<sub>2</sub>

Data File C:\CHEM32\1\DATA\ZHOU2019\SIG1002562.D  
 Sample Name: YZ-4-65A

```

=====
Acq. Operator   :
Acq. Instrument : 仪器 1                Location : Vial 1
Injection Date  : 2/23/19 14:27:02
                                           Inj Volume : 5.000 µl

Acq. Method    : C:\CHEM32\1\METHODS\DEF_LC11.M
Last changed   : 2/23/19 14:06:41
                (modified after loading)
Analysis Method : C:\CHEM32\1\METHODS\DEF_LC11.M
Last changed   : 5/30/19 10:21:45
                (modified after loading)
Sample Info    : AD-3, n-hexane/i-PrOH = 80/20, 0.8 mL/min, 30 oC, 254 nm
                m
  
```

Additional Info : Peak(s) manually integrated  
 VWDL A, Wavelength=254 nm (ZHOU2019\SIG1002562.D)

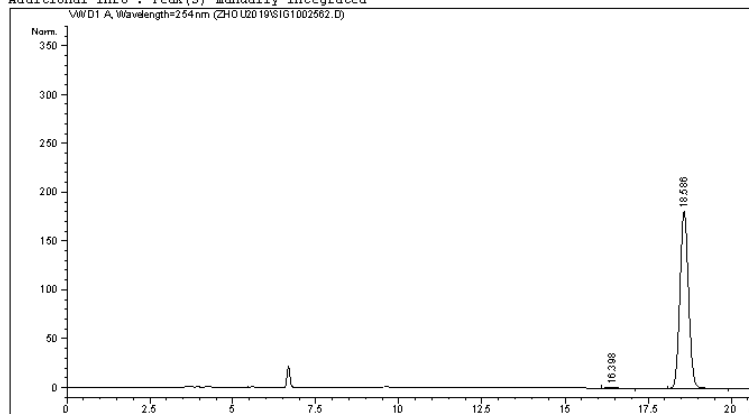

Area Percent Report

```

Sorted By      :      Signal
Multiplier:    :      1.0000
Dilution:      :      1.0000
Use Multiplier & Dilution Factor with ISTDs
  
```

Signal 1: VWDL A, Wavelength=254 nm

| Peak # | RetTime [min] | Type | Width [min] | Area [mAU*s] | Height [mAU] | Area %  |
|--------|---------------|------|-------------|--------------|--------------|---------|
| 1      | 16.398        | BB   | 0.2462      | 12.59610     | 7.72629e-1   | 0.3868  |
| 2      | 18.586        | BB   | 0.2806      | 3243.52002   | 181.41284    | 99.6132 |

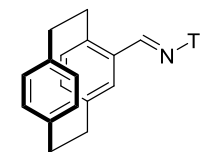

**(-)-1a**  
 Kinetic resolution  
 from 4-FC<sub>6</sub>H<sub>4</sub>B(OH)<sub>2</sub>

Data File C:\CHEM32\1\DATA\ZHOU2019\SIG1002673.D  
 Sample Name: YZ-4-74E

```

=====
Acq. Operator   :
Acq. Instrument : 仪器 1                Location : Vial 1
Injection Date  : 3/11/19 21:25:13
                                           Inj Volume : 5.000 µl

Acq. Method     : C:\CHEM32\1\METHODS\DEF_LC11.M
Last changed    : 3/11/19 21:22:09
                 (modified after loading)
Analysis Method : C:\CHEM32\1\METHODS\DEF_LC11.M
Last changed    : 5/30/19 10:53:00
                 (modified after loading)
Sample Info     : AD-3, n-hexane/i-PrOH =80/20, 0.8 mL/min, 30 oC, 254 nm
  
```

Additional Info : Peak(s) manually integrated

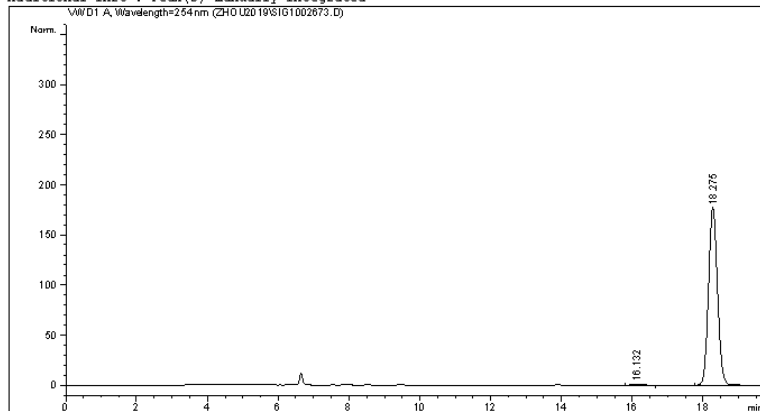

Area Percent Report

```

Sorted By      :      Signal
Multiplier:    :      1.0000
Dilution:      :      1.0000
Use Multiplier & Dilution Factor with ISTDs
  
```

Signal 1: VWD1 A, Wavelength=254 nm

| Peak # | RetTime [min] | Type | Width [min] | Area [mAU*s] | Height [mAU] | Area %  |
|--------|---------------|------|-------------|--------------|--------------|---------|
| 1      | 16.132        | BV   | 0.2730      | 24.26760     | 1.32900      | 0.7670  |
| 2      | 18.275        | VV   | 0.2746      | 3139.73730   | 177.32698    | 99.2330 |

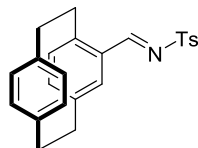

**(-)-1a**  
Kinetic resolution  
from 4-CF<sub>3</sub>C<sub>6</sub>H<sub>4</sub>B(OH)<sub>2</sub>

Data File C:\CHEM32\1\DATA\ZHOU2019\SIG1002634.D  
 Sample Name: YZ-4-72A

```

=====
Acq. Operator   :
Acq. Instrument : 仪器 1                Location : Vial 1
Injection Date  : 3/7/19 14:52:57
                                           Inj Volume : 5.000 µl

Acq. Method     : C:\CHEM32\1\METHODS\DEF_LC11.M
Last changed    : 3/7/19 13:49:58
                 (modified after loading)
Analysis Method : C:\CHEM32\1\METHODS\DEF_LC11.M
Last changed    : 5/30/19 10:37:16
                 (modified after loading)
Sample Info     : AD-3, n-hexane/i-PrOH =80/20, 0.8 mL/min, 30 oC, 254 nm
  
```

Additional Info : Peak(s) manually integrated

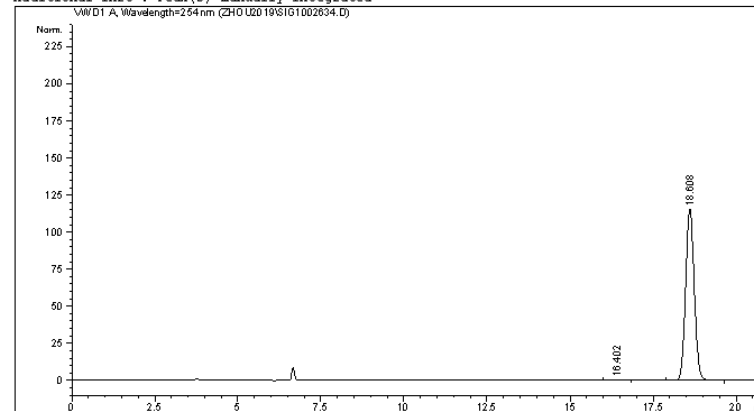

Area Percent Report

```

Sorted By      :      Signal
Multiplier:    :      1.0000
Dilution:      :      1.0000
Use Multiplier & Dilution Factor with ISTDs
  
```

Signal 1: VWD1 A, Wavelength=254 nm

| Peak # | RetTime [min] | Type | Width [min] | Area [mAU*s] | Height [mAU] | Area %  |
|--------|---------------|------|-------------|--------------|--------------|---------|
| 1      | 16.402        | BB   | 0.2663      | 4.59826      | 2.65129e-1   | 0.2218  |
| 2      | 18.608        | BB   | 0.2771      | 2068.83301   | 115.40721    | 99.7782 |

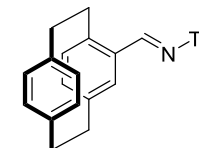

**(-)-1a**  
Kinetic resolution  
from 4-ClC<sub>6</sub>H<sub>4</sub>B(OH)<sub>2</sub>



Data File C:\CHEM32\1\DATA\ZHOU2019\SIG1002672.D  
 Sample Name: YZ-4-74A

```

=====
Acq. Operator   :
Acq. Instrument : 仪器 1                Location : Vial 1
Injection Date  : 3/11/19 20:48:19
                                           Inj Volume : 5.000 µl

Acq. Method     : C:\CHEM32\1\METHODS\DEF_LC11.M
Last changed    : 3/11/19 20:25:14
                 (modified after loading)
Analysis Method : C:\CHEM32\1\METHODS\DEF_LC11.M
Last changed    : 5/30/19 10:44:02
                 (modified after loading)
Sample Info     : AD-3, n-hexane/i-PrOH =80/20, 0.8 mL/min, 30 oC, 254 nm
  
```

Additional Info : Peak(s) manually integrated

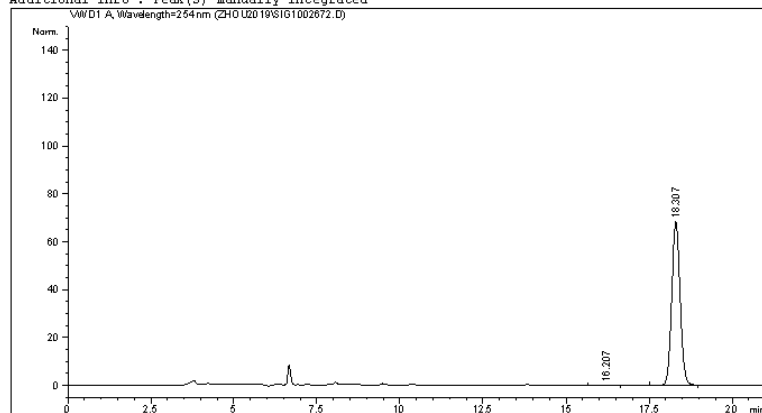

Area Percent Report

```

=====
Sorted By      :      Signal
Multiplier:    :      1.0000
Dilution:      :      1.0000
Use Multiplier & Dilution Factor with ISTDs
  
```

Signal 1: VWD1 A, Wavelength=254 nm

| Peak # | RetTime [min] | Type | Width [min] | Area [mAU*s] | Height [mAU] | Area %  |
|--------|---------------|------|-------------|--------------|--------------|---------|
| 1      | 16.207        | VV   | 0.6405      | 16.37306     | 3.20245e-1   | 1.3236  |
| 2      | 18.307        | BV   | 0.2758      | 1220.64233   | 68.52013     | 98.6764 |

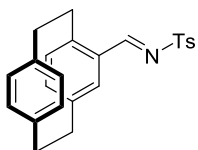

**(-)-1a**  
 Kinetic resolution  
 from 3-FC<sub>6</sub>H<sub>4</sub>B(OH)<sub>2</sub>

Data File C:\CHEM32\1\DATA\ZHOU2019\SIG1002702.D  
 Sample Name: YZ-4-77

```

=====
Acq. Operator   :
Acq. Instrument : 仪器 1                Location : Vial 1
Injection Date   : 3/16/19 16:34:44
                                           Inj Volume : 5.000 µl

Acq. Method     : C:\CHEM32\1\METHODS\DEF_LC11.M
Last changed    : 3/16/19 16:28:23
                 (modified after loading)
Analysis Method : C:\CHEM32\1\METHODS\DEF_LC11.M
Last changed    : 5/30/19 11:00:32
                 (modified after loading)
Sample Info     : AD-3, n-hexane/i-PrOH =80/20, 0.8 mL/min, 30 oC, 254 nm
  
```

Additional Info : Peak(s) manually integrated

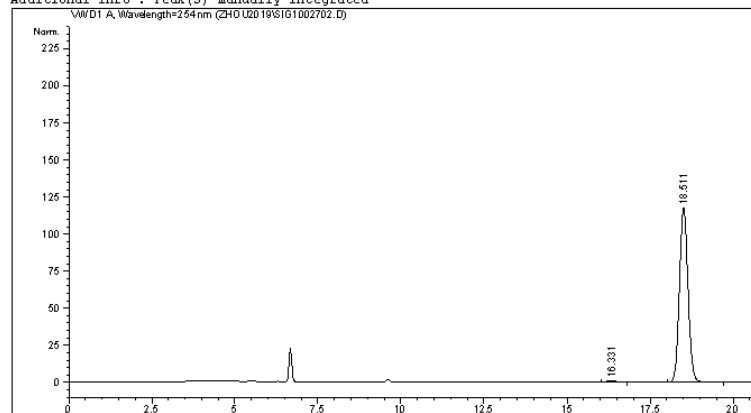

Area Percent Report

```

=====
Sorted By      :      Signal
Multiplier:    :      1.0000
Dilution:      :      1.0000
Use Multiplier & Dilution Factor with ISTDs
  
```

Signal 1: VWD1 A, Wavelength=254 nm

| Peak # | RetTime [min] | Type | Width [min] | Area [mAU*s] | Height [mAU] | Area %  |
|--------|---------------|------|-------------|--------------|--------------|---------|
| 1      | 16.331        | BB   | 0.2472      | 17.21958     | 1.09678      | 0.8148  |
| 2      | 18.511        | BB   | 0.2764      | 2096.09521   | 117.34330    | 99.1852 |

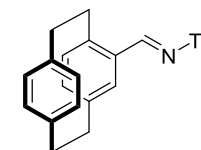

**(-)-1a**  
 Kinetic resolution  
 from 3-CIC<sub>6</sub>H<sub>4</sub>B(OH)<sub>2</sub>

Data File C:\CHEM32\1\DATA\ZHOU2019\SIG1002563.D  
 Sample Name: YZ-4-65E

```

=====
Acq. Operator   :
Acq. Instrument : 仪器 1                Location : Vial 1
Injection Date  : 2/23/19 14:49:53
                                           Inj Volume : 5.000 µl

Acq. Method    : C:\CHEM32\1\METHODS\DEF_LC11.M
Last changed   : 2/23/19 14:48:56
                (modified after loading)
Analysis Method : C:\CHEM32\1\METHODS\DEF_LC11.M
Last changed   : 5/30/19 10:27:42
                (modified after loading)
Sample Info    : AD-3, n-hexane/i-PrOH = 80/20, 0.8 mL/min, 30 oC, 254 nm
                m
  
```

Additional Info : Peak(s) manually integrated  
 VWDL A, Wavelength=254 nm (ZHOU2019\SIG1002563.D)

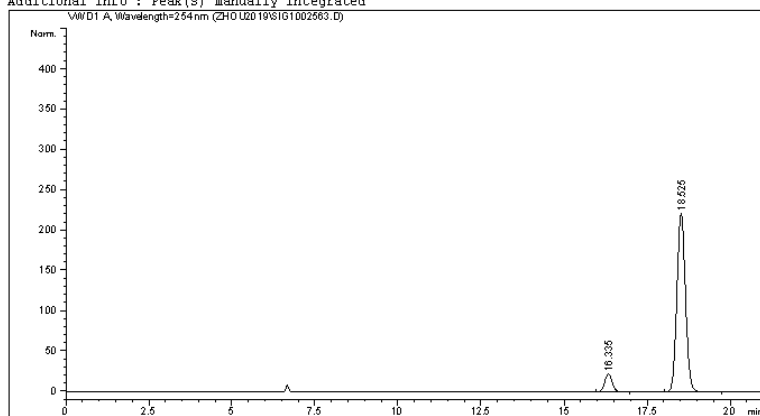

Area Percent Report

```

Sorted By      :      Signal
Multiplier:    :      1.0000
Dilution:      :      1.0000
Use Multiplier & Dilution Factor with ISTDs
  
```

Signal 1: VWDL A, Wavelength=254 nm

| Peak # | RetTime [min] | Type | Width [min] | Area [mAU*s] | Height [mAU] | Area %  |
|--------|---------------|------|-------------|--------------|--------------|---------|
| 1      | 16.335        | BB   | 0.2425      | 347.60333    | 22.21527     | 8.0739  |
| 2      | 18.525        | VB   | 0.2768      | 3957.66699   | 221.08186    | 91.9261 |

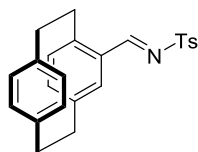

**(-)-1a**  
 Kinetic resolution  
 from 4-MeOC<sub>6</sub>H<sub>4</sub>B(OH)<sub>2</sub>

Data File C:\CHEM32\1\DATA\ZHOU2019\SIG1002615.D  
 Sample Name: YZ-4-68

```

=====
Acq. Operator   :
Acq. Instrument : 仪器 1                Location : Vial 1
Injection Date  : 3/2/19 19:08:27
                                           Inj Volume : 5.000 µl

Acq. Method    : C:\CHEM32\1\METHODS\DEF_LC11.M
Last changed   : 3/2/19 18:34:41
                (modified after loading)
Analysis Method : C:\CHEM32\1\METHODS\DEF_LC11.M
Last changed   : 5/30/19 10:34:34
                (modified after loading)
Sample Info    : AD-3, n-hexane/i-PrOH =80/20, 0.8 mL/min, 30 oC, 254 nm
  
```

Additional Info : Peak(s) manually integrated  
 VWDL A, Wavelength=254 nm (ZHOU2019\SIG1002615.D)

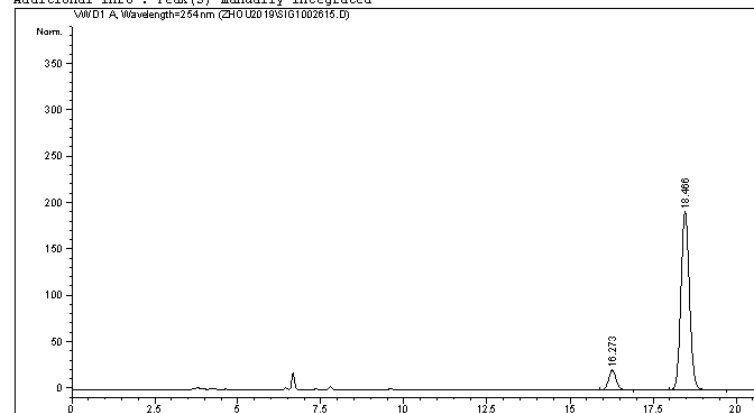

Area Percent Report

```

Sorted By      :      Signal
Multiplier:    :      1.0000
Dilution:      :      1.0000
Use Multiplier & Dilution Factor with ISTDs
  
```

Signal 1: VWDL A, Wavelength=254 nm

| Peak # | RetTime [min] | Type | Width [min] | Area [mAU*s] | Height [mAU] | Area %  |
|--------|---------------|------|-------------|--------------|--------------|---------|
| 1      | 16.273        | BB   | 0.2409      | 329.95752    | 21.27563     | 8.8296  |
| 2      | 18.466        | BB   | 0.2793      | 3406.98022   | 191.71454    | 91.1704 |

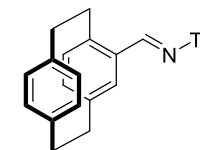

**(-)-1a**  
 Kinetic resolution  
 from 2-naphthylB(OH)<sub>2</sub>

Data File C:\CHEM32\1\DATA\ZHOU2018\SIG1002068.D  
 Sample Name: YZ-4-34A(RAC)

```

=====
Acq. Operator   :
Acq. Instrument : 仪器 1                Location : Vial 91
Injection Date  : 12/8/18 10:42:08
                                           Inj Volume : 5.000 µl

Acq. Method     : C:\CHEM32\1\METHODS\DEF_LC11.M
Last changed    : 12/8/18 10:40:33
                 (modified after loading)
Analysis Method : C:\CHEM32\1\METHODS\DEF_LC11.M
Last changed    : 5/30/19 9:41:08
                 (modified after loading)
Sample Info     : AD-H, n-hexane/i-PrOH = 90/10, 1.0 mL/min, 30 oC, 254 n
                 m
  
```

Additional Info : Peak(s) manually integrated  
 VWDL1 A, Wavelength=254nm (ZHOU2018\SIG1002068.D)

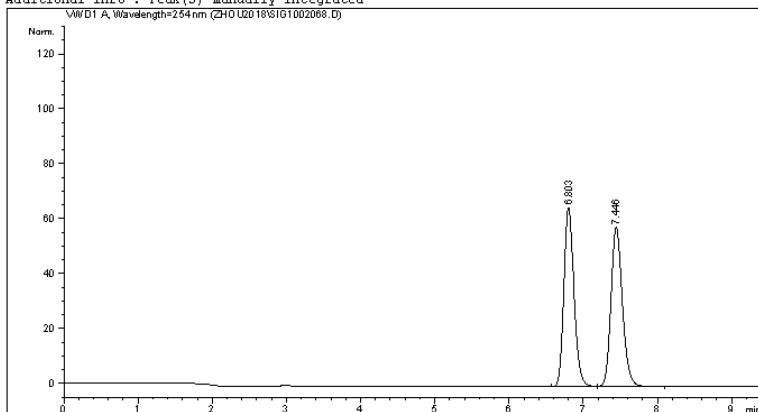

Area Percent Report

```

Sorted By      :      Signal
Multiplier:    :      1.0000
Dilution:      :      1.0000
Use Multiplier & Dilution Factor with ISTDs
  
```

Signal 1: VWDL1 A, Wavelength=254 nm

| Peak # | RetTime [min] | Type | Width [min] | Area [mAU*s] | Height [mAU] | Area %  |
|--------|---------------|------|-------------|--------------|--------------|---------|
| 1      | 6.803         | VV   | 0.1468      | 616.60956    | 64.94445     | 49.8919 |
| 2      | 7.446         | VB   | 0.1690      | 619.28156    | 57.78165     | 50.1081 |

仪器 1 5/30/19 9:41:19

Page 1 of 2

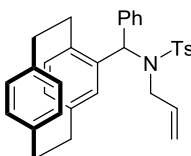

rac-2a

Data File C:\CHEM32\1\DATA\ZHOU2019\SIG1002454.D  
 Sample Name: YZ-4-58BTM

```

=====
Acq. Operator   :
Acq. Instrument : 仪器 1                Location : Vial 91
Injection Date  : 1/13/19 15:08:47
                                           Inj Volume : 5.000 µl

Acq. Method     : C:\CHEM32\1\METHODS\DEF_LC11.M
Last changed    : 1/13/19 14:42:39
                 (modified after loading)
Analysis Method : C:\CHEM32\1\METHODS\DEF_LC11.M
Last changed    : 5/30/19 9:44:46
                 (modified after loading)
Sample Info     : AD-H, n-hexane/i-PrOH = 90/10, 1.0 mL/min, 30 oC, 254 n
                 m
  
```

Additional Info : Peak(s) manually integrated  
 VWDL1 A, Wavelength=254nm (ZHOU2019\SIG1002454.D)

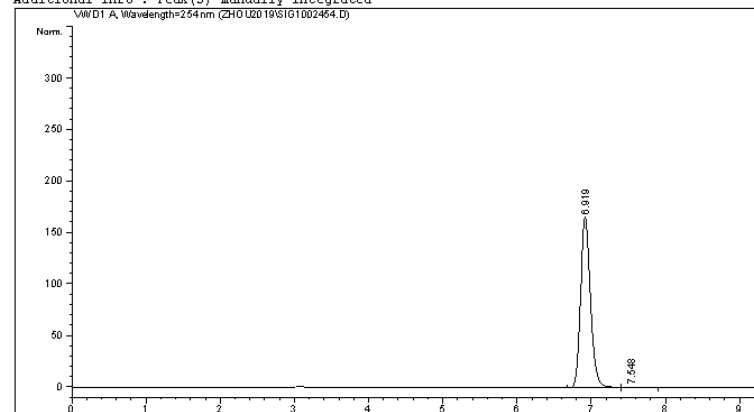

Area Percent Report

```

Sorted By      :      Signal
Multiplier:    :      1.0000
Dilution:      :      1.0000
Use Multiplier & Dilution Factor with ISTDs
  
```

Signal 1: VWDL1 A, Wavelength=254 nm

| Peak # | RetTime [min] | Type | Width [min] | Area [mAU*s] | Height [mAU] | Area %  |
|--------|---------------|------|-------------|--------------|--------------|---------|
| 1      | 6.919         | VV   | 0.1410      | 1546.39587   | 165.49921    | 99.3899 |
| 2      | 7.548         | VB   | 0.1748      | 9.49277      | 7.98050e-1   | 0.6101  |

仪器 1 5/30/19 9:44:53

Page 1 of 2

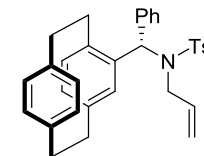

(+)-2a

Data File C:\CHEM32\1\DATA\ZHOU2019\SIG1002511.D  
 Sample Name: YZ-4-60ATH-rac

```

=====
Acq. Operator   :
Acq. Instrument : 仪器 1                Location : Vial 91
Injection Date  : 1/20/19 13:43:52
                                           Inj Volume : 5.000 µl

Acq. Method    : C:\CHEM32\1\METHODS\DEF_LC11.M
Last changed   : 1/20/19 13:36:11
                (modified after loading)
Analysis Method : C:\CHEM32\1\METHODS\DEF_LC11.M
Last changed   : 5/30/19 10:13:31
                (modified after loading)
Sample Info    : AD-H, n-hexane/i-PrOH = 90/10, 1.0 mL/min, 30 oC, 254 n
                m
  
```

Additional Info : Peak(s) manually integrated  
 VWDL A, Wavelength=254nm (ZHOU2019\SIG1002511.D)

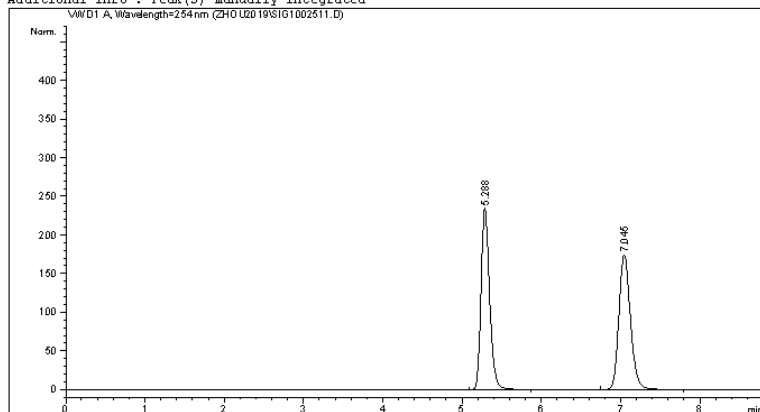

Area Percent Report

```

=====
Sorted By      :      Signal
Multiplier:    :      1.0000
Dilution:      :      1.0000
Use Multiplier & Dilution Factor with ISTDs
  
```

Signal 1: VWDL A, Wavelength=254 nm

| Peak # | RetTime [min] | Type | Width [min] | Area [mAU*s] | Height [mAU] | Area %  |
|--------|---------------|------|-------------|--------------|--------------|---------|
| 1      | 5.288         | VB   | 0.1161      | 1773.82800   | 234.77663    | 49.8177 |
| 2      | 7.045         | VB   | 0.1554      | 1786.80872   | 174.56734    | 50.1823 |

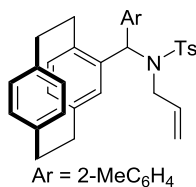

仪器 1 5/30/19 10:13:37

Page 1 of 2

Data File C:\CHEM32\1\DATA\ZHOU2019\SIG1002512.D  
 Sample Name: YZ-4-60ATH

```

=====
Acq. Operator   :
Acq. Instrument : 仪器 1                Location : Vial 91
Injection Date  : 1/20/19 14:00:58
                                           Inj Volume : 5.000 µl

Acq. Method    : C:\CHEM32\1\METHODS\DEF_LC11.M
Last changed   : 1/20/19 13:53:05
                (modified after loading)
Analysis Method : C:\CHEM32\1\METHODS\DEF_LC11.M
Last changed   : 5/30/19 10:15:57
                (modified after loading)
Sample Info    : AD-H, n-hexane/i-PrOH = 90/10, 1.0 mL/min, 30 oC, 254 n
                m
  
```

Additional Info : Peak(s) manually integrated  
 VWDL A, Wavelength=254nm (ZHOU2019\SIG1002512.D)

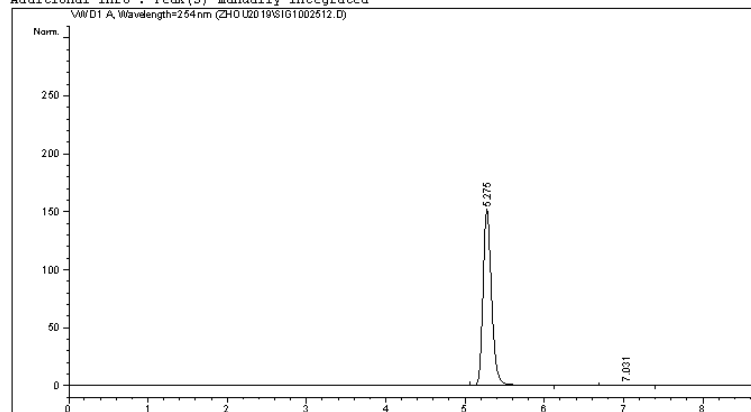

Area Percent Report

```

=====
Sorted By      :      Signal
Multiplier:    :      1.0000
Dilution:      :      1.0000
Use Multiplier & Dilution Factor with ISTDs
  
```

Signal 1: VWDL A, Wavelength=254 nm

| Peak # | RetTime [min] | Type | Width [min] | Area [mAU*s] | Height [mAU] | Area %  |
|--------|---------------|------|-------------|--------------|--------------|---------|
| 1      | 5.275         | VB   | 0.1157      | 1137.33081   | 151.29573    | 99.3545 |
| 2      | 7.031         | VB   | 0.1814      | 7.38900      | 5.93066e-1   | 0.6455  |

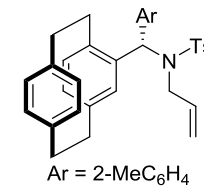

仪器 1 5/30/19 10:16:02

Page 1 of 2

Data File C:\CHEM32\1\DATA\ZHOU2019\SIG1002518.D  
 Sample Name: YZ-4-60BTM-rac

```

=====
Acq. Operator   :
Acq. Instrument : 仪器 1                Location : Vial 91
Injection Date  : 1/20/19 16:14:19
                                           Inj Volume : 5.000 µl

Acq. Method     : C:\CHEM32\1\METHODS\DEF_LC11.M
Last changed    : 1/20/19 16:08:14
                 (modified after loading)
Analysis Method : C:\CHEM32\1\METHODS\DEF_LC11.M
Last changed    : 5/30/19 9:56:17
                 (modified after loading)
Sample Info     : IC, n-hexane/i-PrOH = 90/10, 1.0 mL/min, 30 oC, 254 nm
  
```

Additional Info : Peak(s) manually integrated

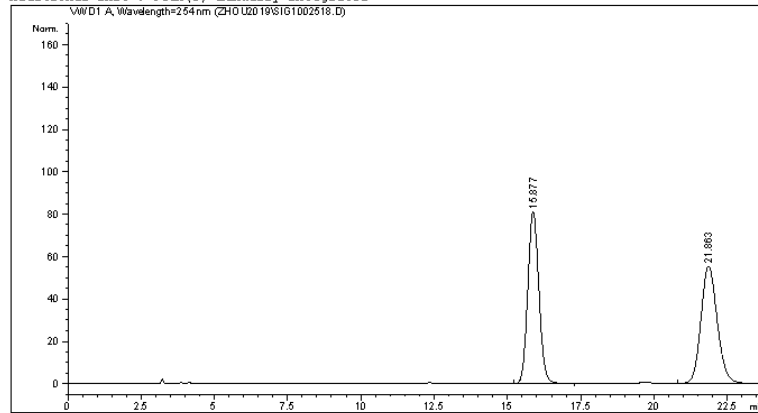

Area Percent Report

```

=====
Sorted By      :      Signal
Multiplier:    :      1.0000
Dilution:      :      1.0000
Use Multiplier & Dilution Factor with ISTDs
  
```

Signal 1: VWD1 A, Wavelength=254 nm

| Peak # | RetTime [min] | Type | Width [min] | Area [mAU*s] | Height [mAU] | Area %  |
|--------|---------------|------|-------------|--------------|--------------|---------|
| 1      | 15.877        | BB   | 0.4098      | 2122.69409   | 80.99484     | 49.8428 |
| 2      | 21.863        | BB   | 0.5953      | 2136.08423   | 55.22515     | 50.1572 |

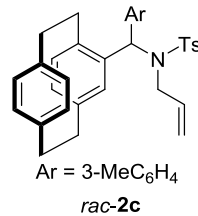

Data File C:\CHEM32\1\DATA\ZHOU2019\SIG1002519.D  
 Sample Name: YZ-4-60BTM

```

=====
Acq. Operator   :
Acq. Instrument : 仪器 1                Location : Vial 91
Injection Date  : 1/20/19 16:44:09
                                           Inj Volume : 5.000 µl

Acq. Method     : C:\CHEM32\1\METHODS\DEF_LC11.M
Last changed    : 1/20/19 16:39:16
                 (modified after loading)
Analysis Method : C:\CHEM32\1\METHODS\DEF_LC11.M
Last changed    : 5/30/19 10:00:29
                 (modified after loading)
Sample Info     : IC, n-hexane/i-PrOH = 90/10, 1.0 mL/min, 30 oC, 254 nm
  
```

Additional Info : Peak(s) manually integrated

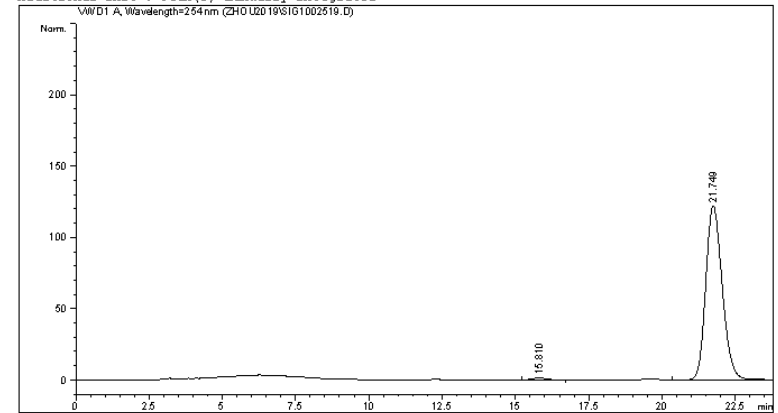

Area Percent Report

```

=====
Sorted By      :      Signal
Multiplier:    :      1.0000
Dilution:      :      1.0000
Use Multiplier & Dilution Factor with ISTDs
  
```

Signal 1: VWD1 A, Wavelength=254 nm

| Peak # | RetTime [min] | Type | Width [min] | Area [mAU*s] | Height [mAU] | Area %  |
|--------|---------------|------|-------------|--------------|--------------|---------|
| 1      | 15.810        | BB   | 0.4197      | 45.00853     | 1.66333      | 0.9363  |
| 2      | 21.749        | VB   | 0.6029      | 4762.27295   | 122.14498    | 99.0637 |

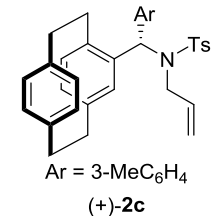

Data File C:\CHEM32\1\DATA\ZHOU-19\YZN011706.D  
 Sample Name: YZ-4-62TMac

=====  
 Acq. Operator :  
 Acq. Instrument : Instrument 1 Location : -  
 Injection Date : 1/24/2019 8:46:16 PM  
 Acq. Method : C:\CHEM32\1\METHODS\DEF\_LC11.M  
 Last changed : 1/24/2019 8:28:38 PM  
 (modified after loading)  
 Analysis Method : C:\CHEM32\1\METHODS\DEF\_LC11.M  
 Last changed : 5/30/2019 11:42:24 AM  
 (modified after loading)  
 Sample Info : AD-H, Hexane/i-PrOH = 90/10, 1.0 mL/min, 30 oC, 254nm

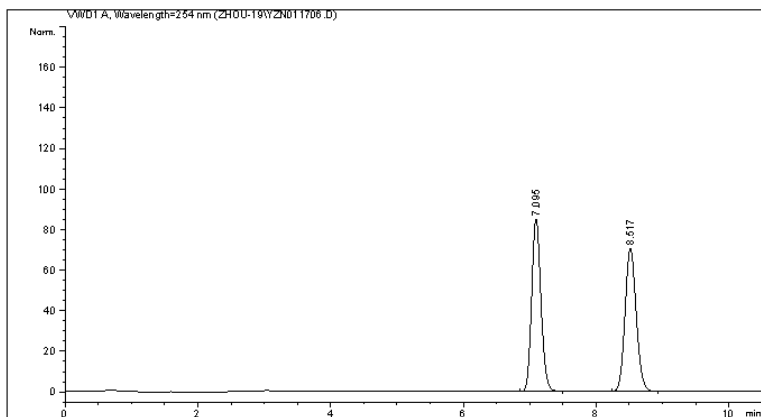

=====  
 Area Percent Report  
 =====

Sorted By : Signal  
 Multiplier: : 1.0000  
 Dilution: : 1.0000  
 Use Multiplier & Dilution Factor with ISTDs

Signal 1: WVD1 A, Wavelength=254 nm

| Peak # | RetTime [min] | Type | Width [min] | Area [mAU] | %s | Height [mAU] | Area %  |
|--------|---------------|------|-------------|------------|----|--------------|---------|
| 1      | 7.095         | BB   | 0.1498      | 828.18707  |    | 85.17899     | 50.0782 |
| 2      | 8.517         | BB   | 0.1819      | 825.60114  |    | 70.45312     | 49.9218 |

Totals : 1653.78821 155.63210

=====  
 \*\*\* End of Report \*\*\*

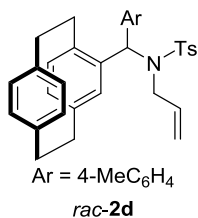

Data File C:\CHEM32\1\DATA\ZHOU-19\YZN011707.D  
 Sample Name: YZ-4-62TM

=====  
 Acq. Operator :  
 Acq. Instrument : Instrument 1 Location : -  
 Injection Date : 1/24/2019 9:20:35 PM  
 Acq. Method : C:\CHEM32\1\METHODS\DEF\_LC11.M  
 Last changed : 1/24/2019 9:08:41 PM  
 (modified after loading)  
 Analysis Method : C:\CHEM32\1\METHODS\DEF\_LC11.M  
 Last changed : 5/30/2019 2:12:38 PM  
 (modified after loading)  
 Sample Info : AD-H, Hexane/i-PrOH = 90/10, 1.0 mL/min, 30 oC, 254nm

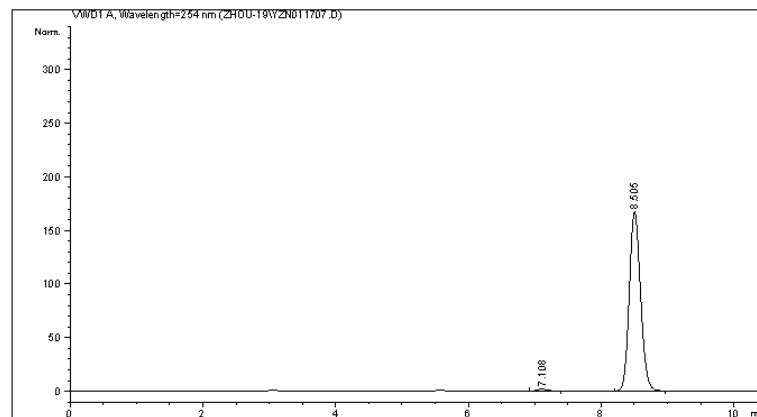

=====  
 Area Percent Report  
 =====

Sorted By : Signal  
 Multiplier: : 1.0000  
 Dilution: : 1.0000  
 Use Multiplier & Dilution Factor with ISTDs

Signal 1: WVD1 A, Wavelength=254 nm

| Peak # | RetTime [min] | Type | Width [min] | Area [mAU] | %s | Height [mAU] | Area %  |
|--------|---------------|------|-------------|------------|----|--------------|---------|
| 1      | 7.108         | BB   | 0.1513      | 16.94180   |    | 1.71987      | 0.8538  |
| 2      | 8.505         | BB   | 0.1840      | 1967.32690 |    | 166.99042    | 99.1462 |

Totals : 1984.26870 168.71029

=====  
 \*\*\* End of Report \*\*\*

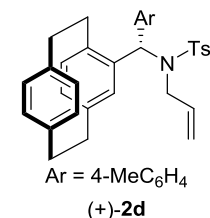

Data File C:\CHEM32\1\DATA\ZHOU2019\SIG1002572.D  
 Sample Name: YZ-4-65ATH(RAC)

=====  
 Acq. Operator :  
 Acq. Instrument : 仪器 1 Location : Vial 1  
 Injection Date : 2/26/19 9:40:56 Inj Volume : 5.000 µl  
 Acq. Method : C:\CHEM32\1\METHODS\DEF\_LC11.M  
 Last changed : 2/26/19 9:37:52  
 (modified after loading)  
 Analysis Method : C:\CHEM32\1\METHODS\DEF\_LC11.M  
 Last changed : 5/30/19 10:23:50  
 (modified after loading)  
 Sample Info : IB, n-hexane/i-PrOH =80/20, 1.0 mL/min, 30 oC, 254 nm

Additional Info : Peak(s) manually integrated

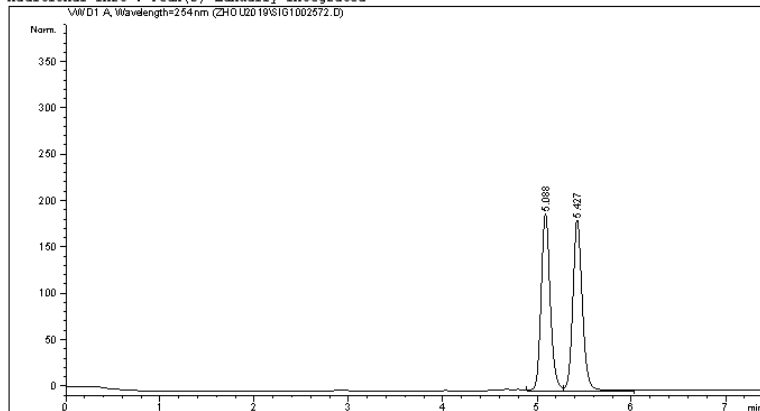

=====  
 Area Percent Report  
 =====

Sorted By : Signal  
 Multiplier: : 1.0000  
 Dilution: : 1.0000  
 Use Multiplier & Dilution Factor with ISTDs

Signal 1: VWD1 A, Wavelength=254 nm

| Peak # | RetTime [min] | Type | Width [min] | Area [mAU*s] | Height [mAU] | Area %  |
|--------|---------------|------|-------------|--------------|--------------|---------|
| 1      | 5.088         | VV   | 0.1074      | 1295.38733   | 190.37517    | 49.6614 |
| 2      | 5.427         | VV   | 0.1076      | 1313.04907   | 183.26695    | 50.3386 |

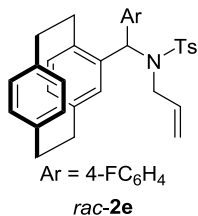

Data File C:\CHEM32\1\DATA\ZHOU2019\SIG1002573.D  
 Sample Name: YZ-4-65ATH

=====  
 Acq. Operator :  
 Acq. Instrument : 仪器 1 Location : Vial 1  
 Injection Date : 2/26/19 10:10:55 Inj Volume : 5.000 µl  
 Acq. Method : C:\CHEM32\1\METHODS\DEF\_LC11.M  
 Last changed : 2/26/19 9:55:52  
 (modified after loading)  
 Analysis Method : C:\CHEM32\1\METHODS\DEF\_LC11.M  
 Last changed : 5/30/19 10:26:07  
 (modified after loading)  
 Sample Info : IB, n-hexane/i-PrOH =80/20, 1.0 mL/min, 30 oC, 254 nm

Additional Info : Peak(s) manually integrated

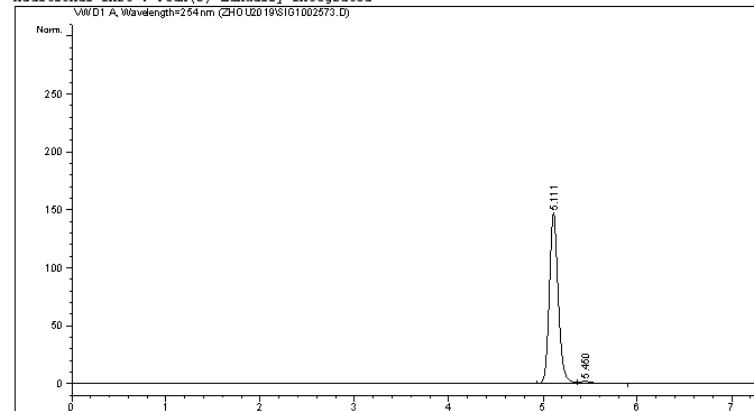

=====  
 Area Percent Report  
 =====

Sorted By : Signal  
 Multiplier: : 1.0000  
 Dilution: : 1.0000  
 Use Multiplier & Dilution Factor with ISTDs

Signal 1: VWD1 A, Wavelength=254 nm

| Peak # | RetTime [min] | Type | Width [min] | Area [mAU*s] | Height [mAU] | Area %  |
|--------|---------------|------|-------------|--------------|--------------|---------|
| 1      | 5.111         | VV   | 0.1058      | 976.24976    | 146.41737    | 98.0768 |
| 2      | 5.450         | VV   | 0.1333      | 19.14368     | 2.04433      | 1.9232  |

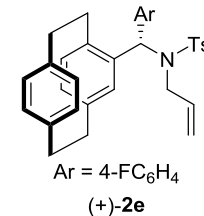

Data File C:\CHEM32\1\DATA\ZHOU2019\SIG1002689.D  
 Sample Name: YZ-4-74BTH(RAC)

```

=====
Acq. Operator   :
Acq. Instrument : 仪器 1                Location : Vial 1
Injection Date  : 3/13/19 15:35:31
                                           Inj Volume : 5.000 µl

Acq. Method     : C:\CHEM32\1\METHODS\DEF_LC11.M
Last changed    : 3/13/19 15:25:54
                 (modified after loading)
Analysis Method : C:\CHEM32\1\METHODS\DEF_LC11.M
Last changed    : 5/30/19 10:54:57
                 (modified after loading)
Sample Info     : IB, n-hexane/i-PrOH =90/10, 1.0 mL/min, 30 oC, 254 nm
  
```

Additional Info : Peak(s) manually integrated

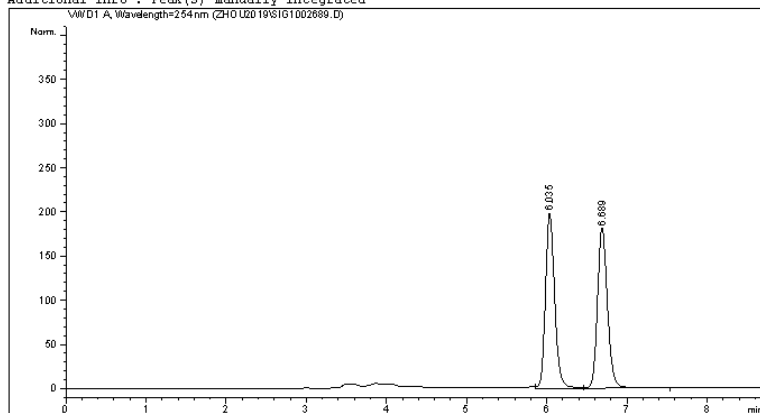

Area Percent Report

```

Sorted By      :      Signal
Multiplier:    :      1.0000
Dilution:      :      1.0000
Use Multiplier & Dilution Factor with ISTDs
  
```

Signal 1: VWD1 A, Wavelength=254 nm

| Peak # | RetTime [min] | Type | Width [min] | Area [mAU*s] | Height [mAU] | Area %  |
|--------|---------------|------|-------------|--------------|--------------|---------|
| 1      | 6.035         | VV   | 0.1249      | 1574.70276   | 197.71895    | 50.1111 |
| 2      | 6.689         | VB   | 0.1333      | 1567.71960   | 180.62619    | 49.8889 |

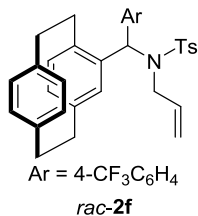

Data File C:\CHEM32\1\DATA\ZHOU2019\SIG1002690.D  
 Sample Name: YZ-4-74BTH

```

=====
Acq. Operator   :
Acq. Instrument : 仪器 1                Location : Vial 1
Injection Date  : 3/13/19 15:48:33
                                           Inj Volume : 5.000 µl

Acq. Method     : C:\CHEM32\1\METHODS\DEF_LC11.M
Last changed    : 3/13/19 15:44:49
                 (modified after loading)
Analysis Method : C:\CHEM32\1\METHODS\DEF_LC11.M
Last changed    : 5/30/19 10:57:45
                 (modified after loading)
Sample Info     : IB, n-hexane/i-PrOH =90/10, 1.0 mL/min, 30 oC, 254 nm
  
```

Additional Info : Peak(s) manually integrated

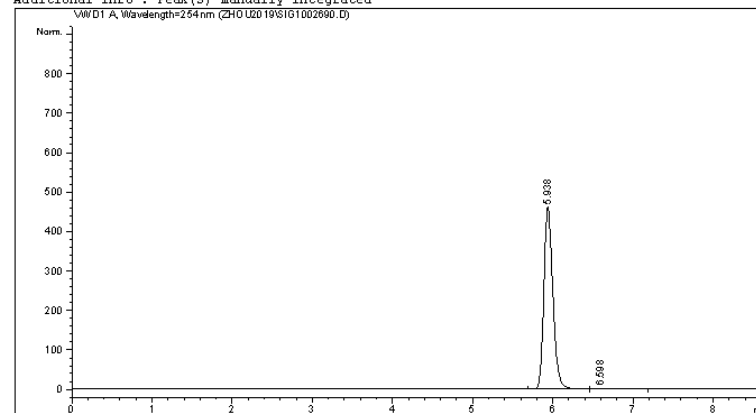

Area Percent Report

```

Sorted By      :      Signal
Multiplier:    :      1.0000
Dilution:      :      1.0000
Use Multiplier & Dilution Factor with ISTDs
  
```

Signal 1: VWD1 A, Wavelength=254 nm

| Peak # | RetTime [min] | Type | Width [min] | Area [mAU*s] | Height [mAU] | Area %  |
|--------|---------------|------|-------------|--------------|--------------|---------|
| 1      | 5.938         | VV   | 0.1197      | 3623.50244   | 461.16406    | 99.3273 |
| 2      | 6.598         | VV   | 0.1821      | 24.54160     | 1.90772      | 0.6727  |

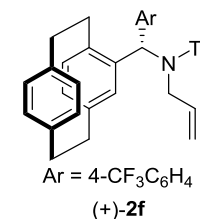



Data File C:\CHEM32\1\DATA\ZHOU2019\SIG1002649.D  
 Sample Name: YZ-4-72ATH RAC

=====  
 Acq. Operator :  
 Acq. Instrument : 仪器 1 Location : Vial 1  
 Injection Date : 3/9/19 9:45:10 Inj Volume : 5.000 µl  
 Acq. Method : C:\CHEM32\1\METHODS\DEF\_LC11.M  
 Last changed : 3/9/19 9:38:16  
 (modified after loading)  
 Analysis Method : C:\CHEM32\1\METHODS\DEF\_LC11.M  
 Last changed : 5/30/19 10:39:35  
 (modified after loading)  
 Sample Info : IB, n-hexane/i-PrOH =80/20, 0.8 mL/min, 30 oC, 254 nm

Additional Info : Peak(s) manually integrated

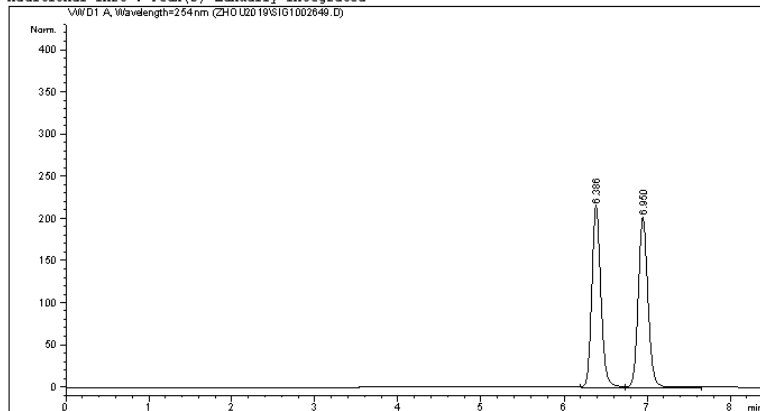

=====  
 Area Percent Report  
 =====

Sorted By : Signal  
 Multiplier: : 1.0000  
 Dilution: : 1.0000  
 Use Multiplier & Dilution Factor with ISTDs

Signal 1: VWD1 A, Wavelength=254 nm

| Peak # | RetTime [min] | Type | Width [min] | Area [mAU*s] | Height [mAU] | Area %  |
|--------|---------------|------|-------------|--------------|--------------|---------|
| 1      | 6.386         | VV   | 0.1217      | 1653.46570   | 214.99780    | 49.9937 |
| 2      | 6.950         | VV   | 0.1280      | 1653.88330   | 200.99446    | 50.0063 |

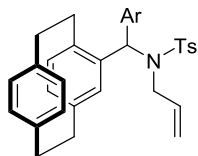

Ar = 4-ClC<sub>6</sub>H<sub>4</sub>  
**rac-2g**

Data File C:\CHEM32\1\DATA\ZHOU2019\SIG1002654.D  
 Sample Name: YZ-4-72ATH

=====  
 Acq. Operator :  
 Acq. Instrument : 仪器 1 Location : Vial 1  
 Injection Date : 3/9/19 14:20:02 Inj Volume : 5.000 µl  
 Acq. Method : C:\CHEM32\1\METHODS\DEF\_LC11.M  
 Last changed : 3/9/19 14:17:28  
 (modified after loading)  
 Analysis Method : C:\CHEM32\1\METHODS\DEF\_LC11.M  
 Last changed : 5/30/19 10:41:45  
 (modified after loading)  
 Sample Info : IB, n-hexane/i-PrOH =80/20, 0.8 mL/min, 30 oC, 254 nm

Additional Info : Peak(s) manually integrated

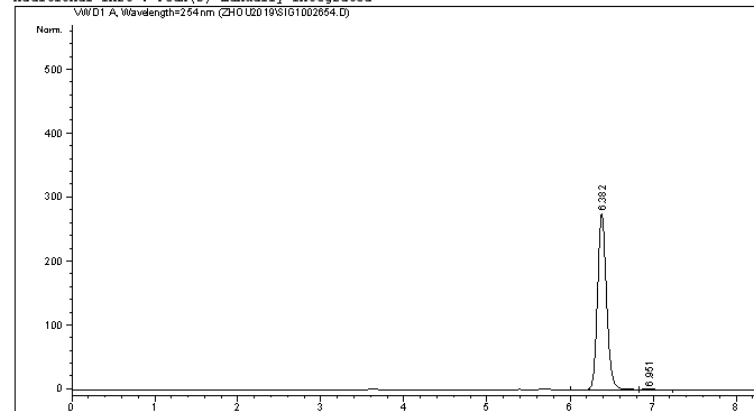

=====  
 Area Percent Report  
 =====

Sorted By : Signal  
 Multiplier: : 1.0000  
 Dilution: : 1.0000  
 Use Multiplier & Dilution Factor with ISTDs

Signal 1: VWD1 A, Wavelength=254 nm

| Peak # | RetTime [min] | Type | Width [min] | Area [mAU*s] | Height [mAU] | Area %  |
|--------|---------------|------|-------------|--------------|--------------|---------|
| 1      | 6.382         | VV   | 0.1170      | 2098.80957   | 275.09128    | 99.4442 |
| 2      | 6.951         | VV   | 0.1537      | 11.73071     | 1.08846      | 0.5558  |

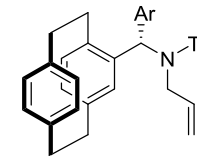

Ar = 4-ClC<sub>6</sub>H<sub>4</sub>  
**(+)-2g**

Data File C:\CHEM32\1\DATA\ZHOU2019\SIG1002685.D  
 Sample Name: YZ-4-74ATH(RAC)

=====  
 Acq. Operator :  
 Acq. Instrument : 仪器 1 Location : Vial 1  
 Injection Date : 3/13/19 11:35:41 Inj Volume : 5.000 µl  
 Acq. Method : C:\CHEM32\1\METHODS\DEF\_LC11.M  
 Last changed : 3/13/19 11:33:58  
 (modified after loading)  
 Analysis Method : C:\CHEM32\1\METHODS\DEF\_LC11.M  
 Last changed : 5/30/19 10:46:04  
 (modified after loading)  
 Sample Info : IA, n-hexane/i-PrOH =90/10, 1.0 mL/min, 30 oC, 254 nm

Additional Info : Peak(s) manually integrated

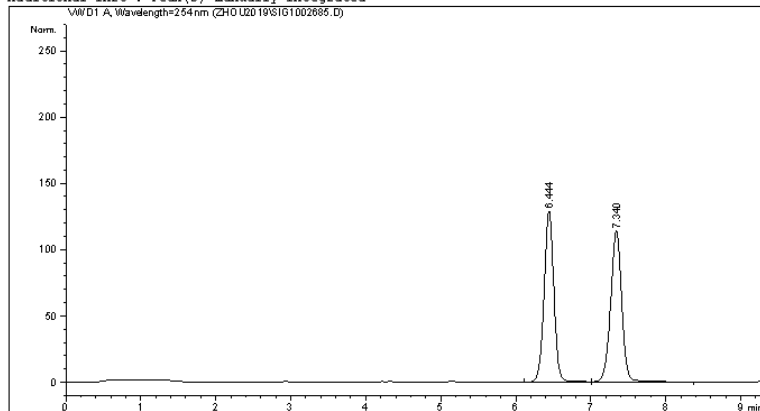

=====  
 Area Percent Report  
 =====

Sorted By : Signal  
 Multiplier: : 1.0000  
 Dilution: : 1.0000  
 Use Multiplier & Dilution Factor with ISTDs

Signal 1: VWD1 A, Wavelength=254 nm

| Peak # | RetTime [min] | Type | Width [min] | Area [mAU*s] | Height [mAU] | Area %  |
|--------|---------------|------|-------------|--------------|--------------|---------|
| 1      | 6.444         | VV   | 0.1419      | 1170.60938   | 128.92268    | 49.6684 |
| 2      | 7.340         | VB   | 0.1576      | 1186.24072   | 113.80168    | 50.3316 |

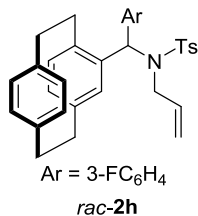

Data File C:\CHEM32\1\DATA\ZHOU2019\SIG1002686.D  
 Sample Name: YZ-4-74ATH

=====  
 Acq. Operator :  
 Acq. Instrument : 仪器 1 Location : Vial 1  
 Injection Date : 3/13/19 14:20:13 Inj Volume : 5.000 µl  
 Acq. Method : C:\CHEM32\1\METHODS\DEF\_LC11.M  
 Last changed : 3/13/19 13:47:06  
 (modified after loading)  
 Analysis Method : C:\CHEM32\1\METHODS\DEF\_LC11.M  
 Last changed : 5/30/19 10:48:45  
 (modified after loading)  
 Sample Info : IA, n-hexane/i-PrOH =90/10, 1.0 mL/min, 30 oC, 254 nm

Additional Info : Peak(s) manually integrated

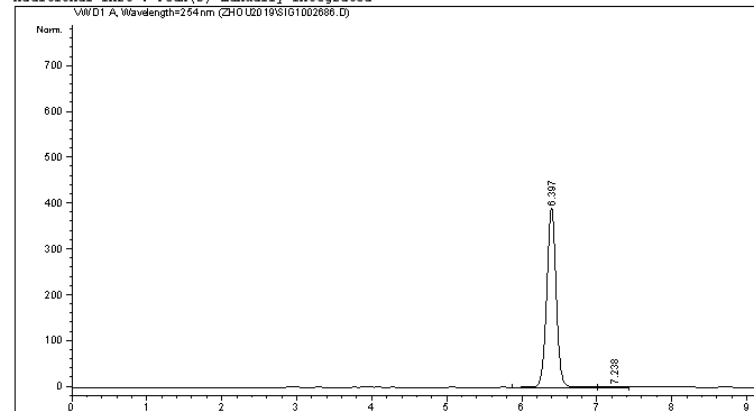

=====  
 Area Percent Report  
 =====

Sorted By : Signal  
 Multiplier: : 1.0000  
 Dilution: : 1.0000  
 Use Multiplier & Dilution Factor with ISTDs

Signal 1: VWD1 A, Wavelength=254 nm

| Peak # | RetTime [min] | Type | Width [min] | Area [mAU*s] | Height [mAU] | Area %  |
|--------|---------------|------|-------------|--------------|--------------|---------|
| 1      | 6.397         | VV   | 0.1351      | 3452.54590   | 390.52866    | 99.4426 |
| 2      | 7.238         | VV   | 0.1987      | 19.35161     | 1.38728      | 0.5574  |

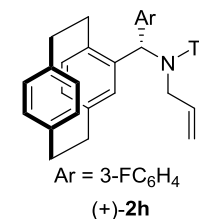

Data File C:\CHEM32\1\DATA\ZHOU-19\YZN012032.D  
 Sample Name: YZ-4-77TM (RAC)

```

=====
Acq. Operator   :                               Location : -
Acq. Instrument : Instrument 1
Injection Date  : 3/18/2019 9:39:09 PM
Acq. Method    : C:\CHEM32\1\METHODS\DEF_LC11.M
Last changed   : 3/18/2019 9:07:39 PM
                (modified after loading)
Analysis Method: C:\CHEM32\1\METHODS\DEF_LC11.M
Last changed   : 5/30/2019 3:06:15 PM
                (modified after loading)
Sample Info    : IC, Hexane/i-PrOH = 80/20, 0.8 mL/min, 30 oC, 254 nm
  
```

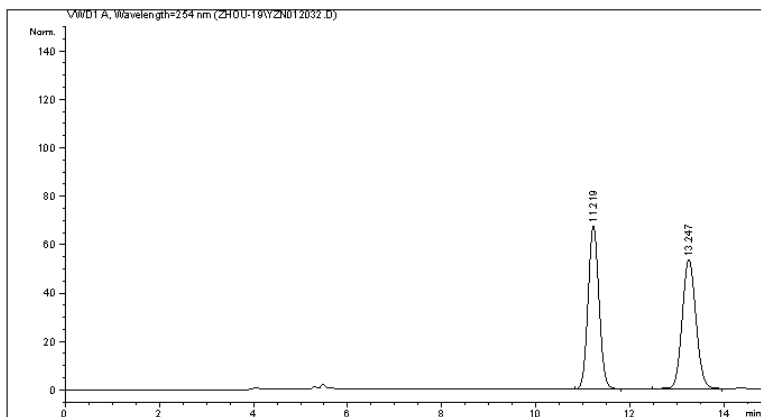

Area Percent Report

```

Sorted By      :      Signal
Multiplier:    :      1.0000
Dilution:      :      1.0000
Use Multiplier & Dilution Factor with ISTDs
  
```

Signal 1: VWD1 A, Wavelength=254 nm

| Peak # | RetTime [min] | Type | Width [min] | Area [mAU] | %s | Height [mAU] | Area %  |
|--------|---------------|------|-------------|------------|----|--------------|---------|
| 1      | 11.219        | BB   | 0.2505      | 1088.86633 |    | 67.61742     | 49.9980 |
| 2      | 13.247        | BB   | 0.3161      | 1088.95276 |    | 53.49617     | 50.0020 |

Totals : 2177.81909 121.11358

\*\*\* End of Report \*\*\*

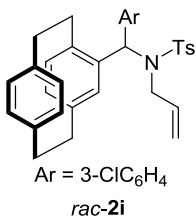

Data File C:\CHEM32\1\DATA\ZHOU-19\YZN012033.D  
 Sample Name: YZ-4-77TM

```

=====
Acq. Operator   :                               Location : -
Acq. Instrument : Instrument 1
Injection Date  : 3/18/2019 9:58:13 PM
Acq. Method    : C:\CHEM32\1\METHODS\DEF_LC11.M
Last changed   : 3/18/2019 9:53:52 PM
                (modified after loading)
Analysis Method: C:\CHEM32\1\METHODS\DEF_LC11.M
Last changed   : 5/30/2019 3:12:11 PM
                (modified after loading)
Sample Info    : IC, Hexane/i-PrOH = 80/20, 0.8 mL/min, 30 oC, 254 nm
  
```

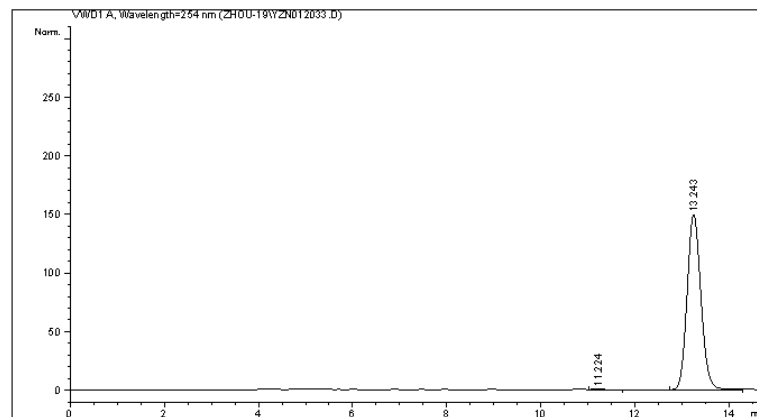

Area Percent Report

```

Sorted By      :      Signal
Multiplier:    :      1.0000
Dilution:      :      1.0000
Use Multiplier & Dilution Factor with ISTDs
  
```

Signal 1: VWD1 A, Wavelength=254 nm

| Peak # | RetTime [min] | Type | Width [min] | Area [mAU] | %s | Height [mAU] | Area %  |
|--------|---------------|------|-------------|------------|----|--------------|---------|
| 1      | 11.224        | VB   | 0.2855      | 9.32760    |    | 4.78741e-1   | 0.3064  |
| 2      | 13.243        | BB   | 0.3156      | 3034.82080 |    | 149.38318    | 99.6936 |

Totals : 3044.14840 149.86192

\*\*\* End of Report \*\*\*

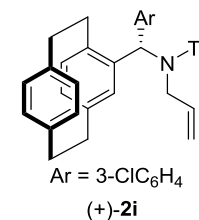

Data File C:\CHEM32\1\DATA\ZHOU2019\SIG1002579.D  
 Sample Name: YZ-4-65BTHRAC

```

=====
Acq. Operator   :
Acq. Instrument : 仪器 1                Location : Vial 1
Injection Date  : 2/26/19 19:28:36
                                           Inj Volume : 5.000 µl

Acq. Method     : C:\CHEM32\1\METHODS\DEF_LC11.M
Last changed    : 2/26/19 19:26:35
                 (modified after loading)
Analysis Method : C:\CHEM32\1\METHODS\DEF_LC11.M
Last changed    : 5/30/19 10:30:25
                 (modified after loading)
Sample Info     : AD-H, n-hexane/i-PrOH =80/20, 1.0 mL/min, 30 oC, 254 nm
  
```

Additional Info : Peak(s) manually integrated

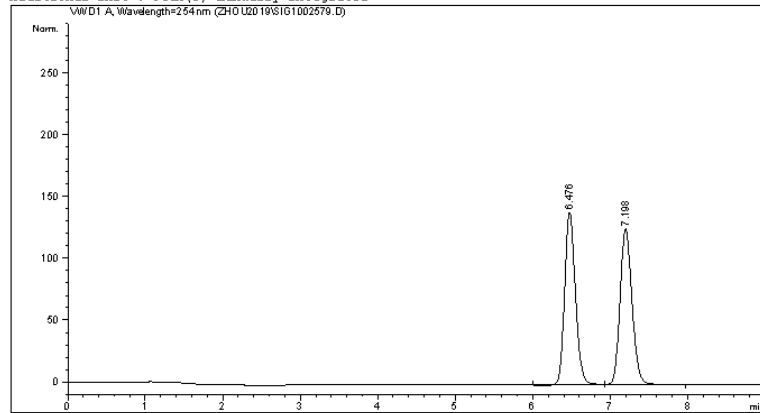

Area Percent Report

```

Sorted By      :      Signal
Multiplier:    :      1.0000
Dilution:      :      1.0000
Use Multiplier & Dilution Factor with ISTDs
  
```

Signal 1: VWD1 A, Wavelength=254 nm

| Peak # | RetTime [min] | Type | Width [min] | Area [mAU*s] | Height [mAU] | Area %  |
|--------|---------------|------|-------------|--------------|--------------|---------|
| 1      | 6.476         | VV   | 0.1500      | 1364.39746   | 139.67671    | 49.8383 |
| 2      | 7.198         | VB   | 0.1669      | 1373.24829   | 126.26674    | 50.1617 |

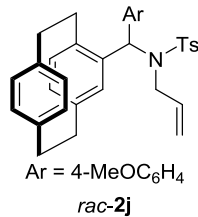

Data File C:\CHEM32\1\DATA\ZHOU2019\SIG1002580.D  
 Sample Name: YZ-4-65BTH

```

=====
Acq. Operator   :
Acq. Instrument : 仪器 1                Location : Vial 1
Injection Date  : 2/26/19 19:42:14
                                           Inj Volume : 5.000 µl

Acq. Method     : C:\CHEM32\1\METHODS\DEF_LC11.M
Last changed    : 2/26/19 19:37:55
                 (modified after loading)
Analysis Method : C:\CHEM32\1\METHODS\DEF_LC11.M
Last changed    : 5/30/19 10:32:27
                 (modified after loading)
Sample Info     : AD-H, n-hexane/i-PrOH =80/20, 1.0 mL/min, 30 oC, 254 nm
  
```

Additional Info : Peak(s) manually integrated

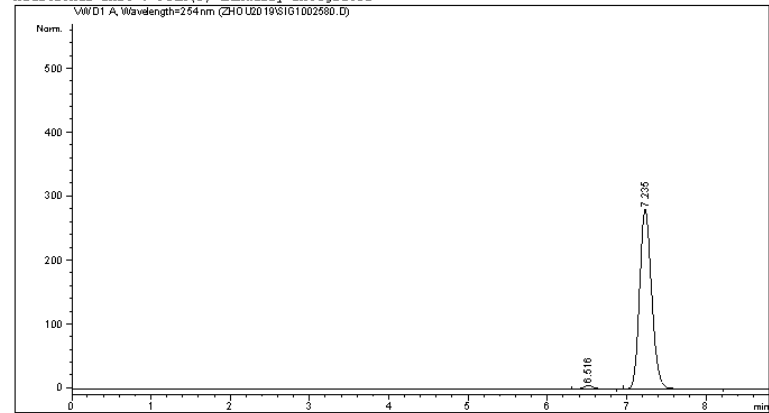

Area Percent Report

```

Sorted By      :      Signal
Multiplier:    :      1.0000
Dilution:      :      1.0000
Use Multiplier & Dilution Factor with ISTDs
  
```

Signal 1: VWD1 A, Wavelength=254 nm

| Peak # | RetTime [min] | Type | Width [min] | Area [mAU*s] | Height [mAU] | Area %  |
|--------|---------------|------|-------------|--------------|--------------|---------|
| 1      | 6.516         | VB   | 0.1543      | 52.88145     | 5.21458      | 1.7472  |
| 2      | 7.235         | BB   | 0.1635      | 2973.78955   | 280.84409    | 98.2528 |

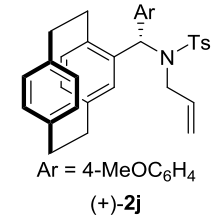

Data File C:\CHEM32\1\DATA\ZHOU-19\YZN011866.D  
 Sample Name: YZ-4-68TRAC

=====  
 Acq. Operator :  
 Acq. Instrument : Instrument 1 Location : -  
 Injection Date : 3/4/2019 2:21:07 PM  
 Acq. Method : C:\CHEM32\1\METHODS\DEF\_LC11.M  
 Last changed : 3/4/2019 2:12:49 PM  
 (modified after loading)  
 Analysis Method : C:\CHEM32\1\METHODS\DEF\_LC11.M  
 Last changed : 5/30/2019 3:01:05 PM  
 (modified after loading)  
 Sample Info : AD-3, Hexane/i-PrOH = 90/10, 1.0 mL/min, 30 oC, 254 nm

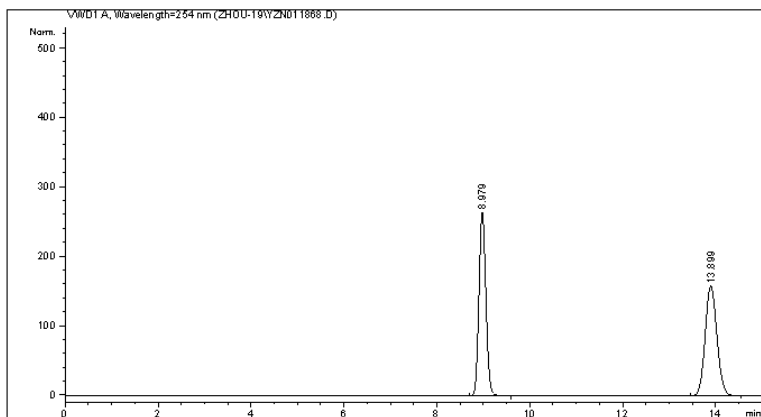

=====  
 Area Percent Report  
 =====

Sorted By : Signal  
 Multiplier: : 1.0000  
 Dilution: : 1.0000  
 Use Multiplier & Dilution Factor with ISTDs

Signal 1: VWD1 A, Wavelength=254 nm

| Peak # | RetTime [min] | Type | Width [min] | Area [mAU] | %s        | Height [mAU] | Area %  |
|--------|---------------|------|-------------|------------|-----------|--------------|---------|
| 1      | 8.979         | BB   | 0.1607      | 2742.24780 | 263.62332 | 263.62332    | 49.7799 |
| 2      | 13.899        | BB   | 0.2732      | 2766.49902 | 157.65988 | 157.65988    | 50.2201 |

Totals : 5508.74683 421.28320

=====  
 \*\*\* End of Report \*\*\*

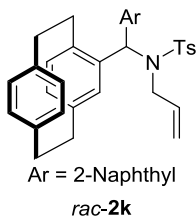

Data File C:\CHEM32\1\DATA\ZHOU-19\YZN011869.D  
 Sample Name: YZ-4-68TM

=====  
 Acq. Operator :  
 Acq. Instrument : Instrument 1 Location : -  
 Injection Date : 3/4/2019 2:42:07 PM  
 Acq. Method : C:\CHEM32\1\METHODS\DEF\_LC11.M  
 Last changed : 3/4/2019 2:37:25 PM  
 (modified after loading)  
 Analysis Method : C:\CHEM32\1\METHODS\DEF\_LC11.M  
 Last changed : 5/30/2019 3:03:12 PM  
 (modified after loading)  
 Sample Info : AD-3, Hexane/i-PrOH = 90/10, 1.0 mL/min, 30 oC, 254 nm

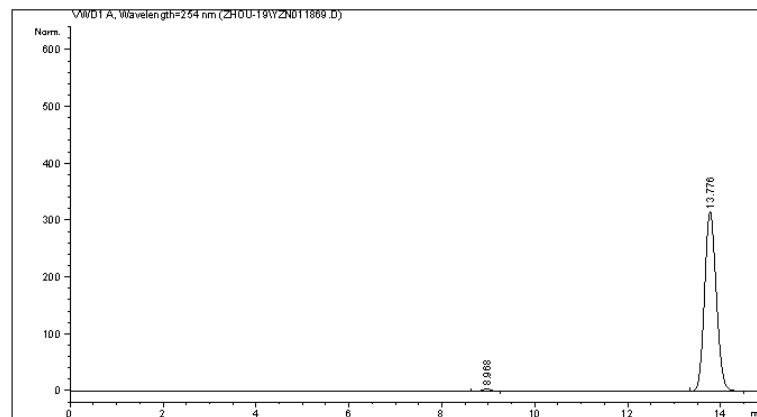

=====  
 Area Percent Report  
 =====

Sorted By : Signal  
 Multiplier: : 1.0000  
 Dilution: : 1.0000  
 Use Multiplier & Dilution Factor with ISTDs

Signal 1: VWD1 A, Wavelength=254 nm

| Peak # | RetTime [min] | Type | Width [min] | Area [mAU] | %s        | Height [mAU] | Area %  |
|--------|---------------|------|-------------|------------|-----------|--------------|---------|
| 1      | 8.968         | BB   | 0.1706      | 43.85571   | 3.89708   | 3.89708      | 0.7900  |
| 2      | 13.776        | BB   | 0.2723      | 5507.79785 | 315.25461 | 315.25461    | 99.2100 |

Totals : 5551.65356 319.15169

=====  
 \*\*\* End of Report \*\*\*

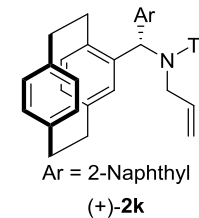

Data File C:\CHEM32\1\DATA\ZHOU2019\SIG1002783.D  
 Sample Name: YZ-4-85SM(RAC)

=====  
 Acq. Operator :  
 Acq. Instrument : 仪器 1 Location : Vial 1  
 Injection Date : 3/28/19 15:10:36 Inj Volume : 5.000 µl  
 Acq. Method : C:\CHEM32\1\METHODS\DEF\_LC11.M  
 Last changed : 3/28/19 15:07:42  
 (modified after loading)  
 Analysis Method : C:\CHEM32\1\METHODS\DEF\_LC11.M  
 Last changed : 5/30/19 11:10:50  
 (modified after loading)  
 Sample Info : AD-H, n-hexane/i-PrOH =80/20, 0.8 mL/min, 30 oC, 254 nm

Additional Info : Peak(s) manually integrated

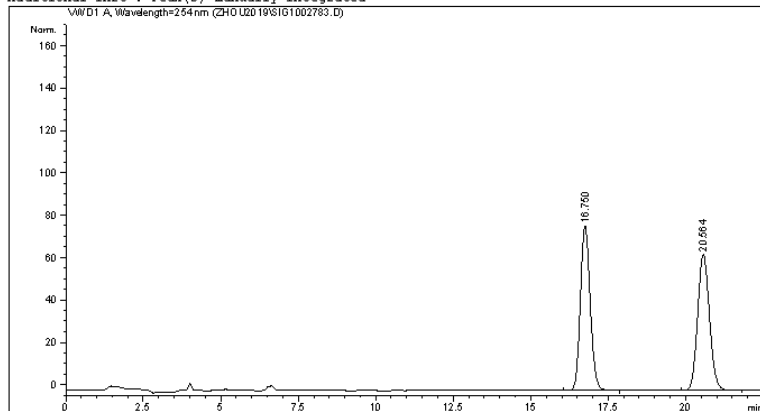

=====  
 Area Percent Report  
 =====

Sorted By : Signal  
 Multiplier: : 1.0000  
 Dilution: : 1.0000  
 Use Multiplier & Dilution Factor with ISTDs

Signal 1: VWD1 A, Wavelength=254 nm

| Peak # | RetTime [min] | Type | Width [min] | Area [mAU*s] | Height [mAU] | Area %  |
|--------|---------------|------|-------------|--------------|--------------|---------|
| 1      | 16.750        | VB   | 0.3398      | 1703.34778   | 77.67725     | 50.0414 |
| 2      | 20.564        | BB   | 0.4090      | 1700.52625   | 64.20832     | 49.9586 |

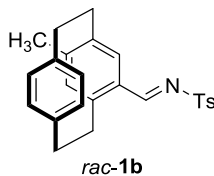

Data File C:\CHEM32\1\DATA\ZHOU2019\SIG1002785.D  
 Sample Name: YZ-4-85A5M

=====  
 Acq. Operator :  
 Acq. Instrument : 仪器 1 Location : Vial 1  
 Injection Date : 3/28/19 16:11:29 Inj Volume : 5.000 µl  
 Acq. Method : C:\CHEM32\1\METHODS\DEF\_LC11.M  
 Last changed : 3/28/19 16:03:42  
 (modified after loading)  
 Analysis Method : C:\CHEM32\1\METHODS\DEF\_LC11.M  
 Last changed : 5/30/19 11:13:02  
 (modified after loading)  
 Sample Info : AD-H, n-hexane/i-PrOH =80/20, 0.8 mL/min, 30 oC, 254 nm

Additional Info : Peak(s) manually integrated

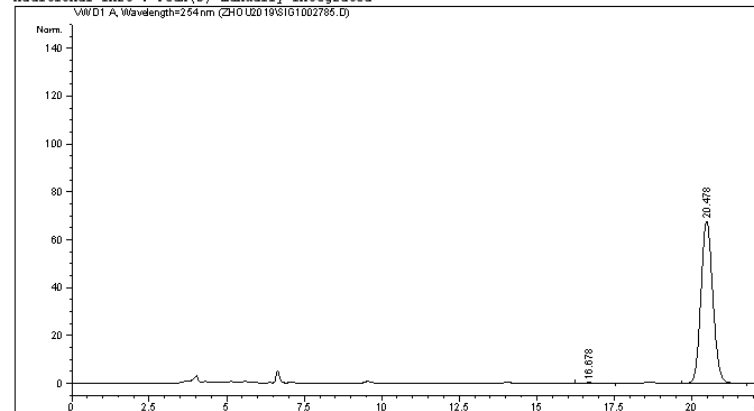

=====  
 Area Percent Report  
 =====

Sorted By : Signal  
 Multiplier: : 1.0000  
 Dilution: : 1.0000  
 Use Multiplier & Dilution Factor with ISTDs

Signal 1: VWD1 A, Wavelength=254 nm

| Peak # | RetTime [min] | Type | Width [min] | Area [mAU*s] | Height [mAU] | Area %  |
|--------|---------------|------|-------------|--------------|--------------|---------|
| 1      | 16.678        | VB   | 0.3780      | 5.37114      | 2.19076e-1   | 0.2988  |
| 2      | 20.478        | VB   | 0.4126      | 1792.24390   | 67.75414     | 99.7012 |

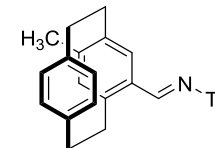

Kinetic resolution  
 from PhB(OH)<sub>2</sub>

Data File C:\CHEM32\1\DATA\ZHOU2019\SIG1002783.D  
 Sample Name: YZ-4-85SM(RAC)

=====  
 Acq. Operator :  
 Acq. Instrument : 仪器 1 Location : Vial 1  
 Injection Date : 3/28/19 15:10:36 Inj Volume : 5.000 µl  
 Acq. Method : C:\CHEM32\1\METHODS\DEF\_LC11.M  
 Last changed : 3/28/19 15:07:42  
 (modified after loading)  
 Analysis Method : C:\CHEM32\1\METHODS\DEF\_LC11.M  
 Last changed : 5/30/19 11:10:50  
 (modified after loading)  
 Sample Info : AD-H, n-hexane/i-PrOH =80/20, 0.8 mL/min, 30 oC, 254 nm

Additional Info : Peak(s) manually integrated

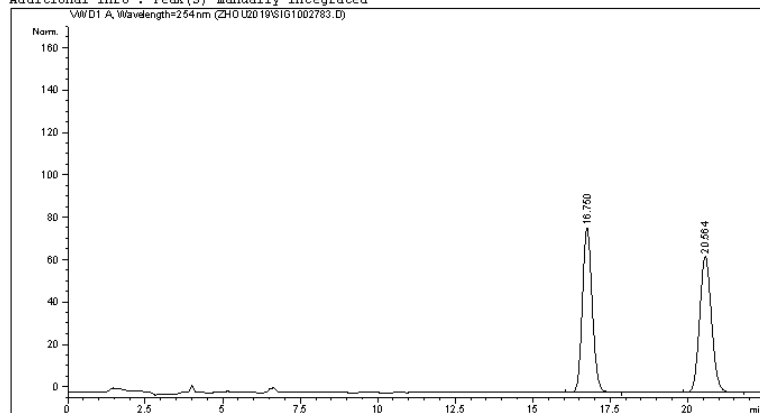

=====  
 Area Percent Report  
 =====

Sorted By : Signal  
 Multiplier: : 1.0000  
 Dilution: : 1.0000  
 Use Multiplier & Dilution Factor with ISTDs

Signal 1: VWD1 A, Wavelength=254 nm

| Peak # | RetTime [min] | Type | Width [min] | Area [mAU*s] | Height [mAU] | Area %  |
|--------|---------------|------|-------------|--------------|--------------|---------|
| 1      | 16.750        | VB   | 0.3398      | 1703.34778   | 77.67725     | 50.0414 |
| 2      | 20.564        | BB   | 0.4090      | 1700.52625   | 64.20832     | 49.9586 |

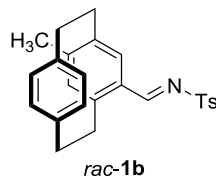

Data File C:\CHEM32\1\DATA\ZHOU2019\SIG1002786.D  
 Sample Name: YZ-4-85BSM

=====  
 Acq. Operator :  
 Acq. Instrument : 仪器 1 Location : Vial 1  
 Injection Date : 3/28/19 16:41:59 Inj Volume : 5.000 µl  
 Acq. Method : C:\CHEM32\1\METHODS\DEF\_LC11.M  
 Last changed : 3/28/19 16:36:17  
 (modified after loading)  
 Analysis Method : C:\CHEM32\1\METHODS\DEF\_LC11.M  
 Last changed : 5/30/19 11:16:11  
 (modified after loading)  
 Sample Info : AD-H, n-hexane/i-PrOH =80/20, 0.8 mL/min, 30 oC, 254 nm

Additional Info : Peak(s) manually integrated

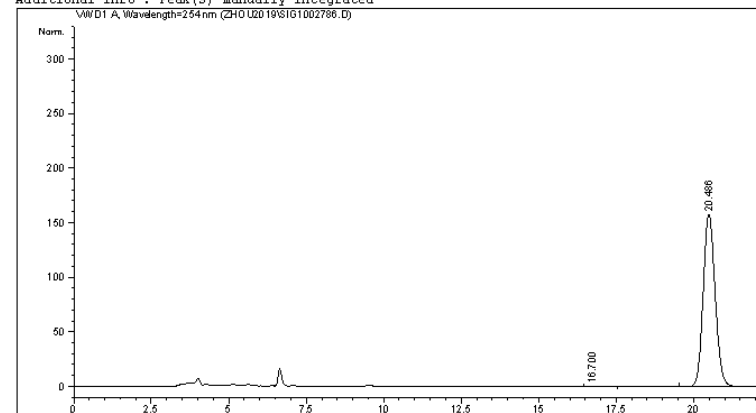

=====  
 Area Percent Report  
 =====

Sorted By : Signal  
 Multiplier: : 1.0000  
 Dilution: : 1.0000  
 Use Multiplier & Dilution Factor with ISTDs

Signal 1: VWD1 A, Wavelength=254 nm

| Peak # | RetTime [min] | Type | Width [min] | Area [mAU*s] | Height [mAU] | Area %  |
|--------|---------------|------|-------------|--------------|--------------|---------|
| 1      | 16.700        | BB   | 0.3320      | 1.72371      | 8.10932e-2   | 0.0410  |
| 2      | 20.486        | VB   | 0.4141      | 4197.48438   | 157.91101    | 99.9590 |

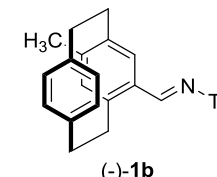

Kinetic resolution  
 from 4-CIC<sub>6</sub>H<sub>4</sub>B(OH)<sub>2</sub>

Data File C:\CHEM32\1\DATA\ZHOU-19\YZN012206.D  
 Sample Name: YZ-4-85ATM(RAC)

=====  
 Acq. Operator :  
 Acq. Instrument : Instrument 1 Location : -  
 Injection Date : 3/29/2019 6:14:54 PM  
 Acq. Method : C:\CHEM32\1\METHODS\DEF\_LC11.M  
 Last changed : 3/29/2019 5:45:37 PM  
 (modified after loading)  
 Analysis Method : C:\CHEM32\1\METHODS\DEF\_LC11.M  
 Last changed : 5/30/2019 3:14:00 PM  
 (modified after loading)  
 Sample Info : IB, Hexane/i-PrOH = 80/20, 0.8 mL/min, 30 oC, 254 nm

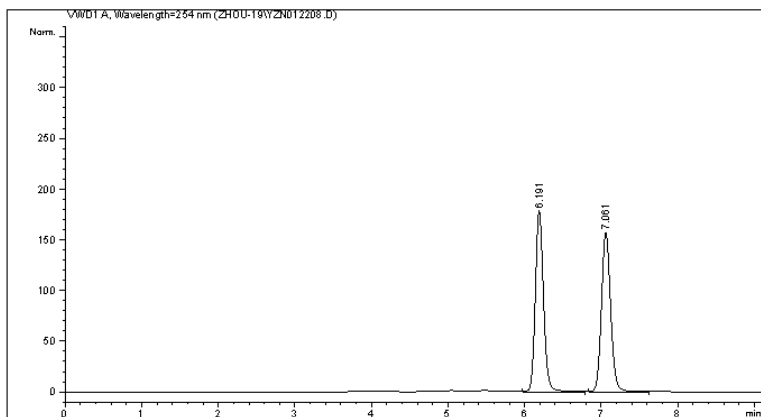

=====  
 Area Percent Report  
 =====

Sorted By : Signal  
 Multiplier: : 1.0000  
 Dilution: : 1.0000  
 Use Multiplier & Dilution Factor with ISTDs

Signal 1: VWD1 A, Wavelength=254 nm

| Peak # | RetTime [min] | Type | Width [min] | Area [mAU] | %s        | Height [mAU] | Area % |
|--------|---------------|------|-------------|------------|-----------|--------------|--------|
| 1      | 6.191         | VB   | 0.1162      | 1327.92615 | 177.90462 | 50.1746      |        |
| 2      | 7.061         | BV   | 0.1300      | 1318.68494 | 156.98839 | 49.8254      |        |

Totals : 2646.61108 334.89301

=====  
 \*\*\* End of Report \*\*\*

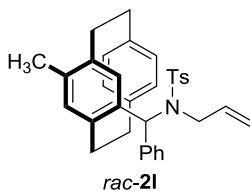

Data File C:\CHEM32\1\DATA\ZHOU-19\YZN012210.D  
 Sample Name: YZ-4-85ATM

=====  
 Acq. Operator :  
 Acq. Instrument : Instrument 1 Location : -  
 Injection Date : 3/29/2019 7:21:42 PM  
 Acq. Method : C:\CHEM32\1\METHODS\DEF\_LC11.M  
 Last changed : 3/29/2019 7:17:30 PM  
 (modified after loading)  
 Analysis Method : C:\CHEM32\1\METHODS\DEF\_LC11.M  
 Last changed : 5/30/2019 3:16:29 PM  
 (modified after loading)  
 Sample Info : IB, Hexane/i-PrOH = 80/20, 0.8 mL/min, 30 oC, 254 nm

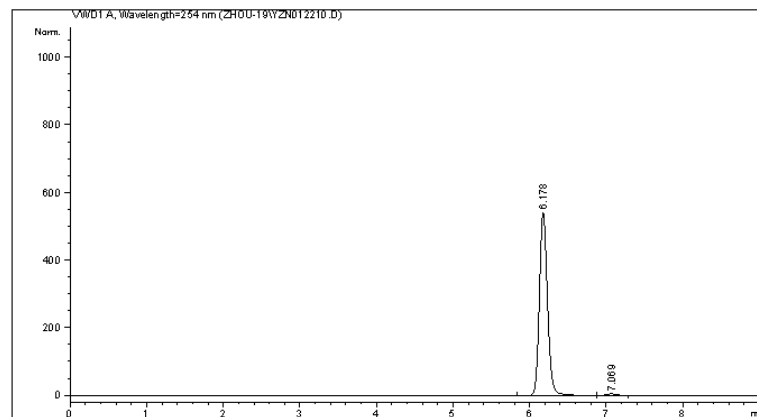

=====  
 Area Percent Report  
 =====

Sorted By : Signal  
 Multiplier: : 1.0000  
 Dilution: : 1.0000  
 Use Multiplier & Dilution Factor with ISTDs

Signal 1: VWD1 A, Wavelength=254 nm

| Peak # | RetTime [min] | Type | Width [min] | Area [mAU] | %s        | Height [mAU] | Area % |
|--------|---------------|------|-------------|------------|-----------|--------------|--------|
| 1      | 6.178         | VV   | 0.1147      | 3966.83667 | 540.66260 | 98.8784      |        |
| 2      | 7.069         | VV   | 0.1416      | 44.99822   | 4.78936   | 1.1216       |        |

Totals : 4011.83489 545.45195

=====  
 \*\*\* End of Report \*\*\*

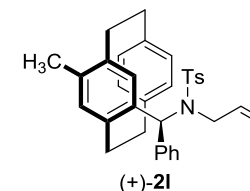



Data File C:\CHEM32\1\DATA\ZHOU-19\YZN012209.D  
 Sample Name: YZ-4-85BTM(RAC)

=====  
 Acq. Operator :  
 Acq. Instrument : Instrument 1 Location : -  
 Injection Date : 3/29/2019 6:50:04 PM  
 Acq. Method : C:\CHEM32\1\METHODS\DEF\_LC11.M  
 Last changed : 3/29/2019 6:31:53 PM  
 (modified after loading)  
 Analysis Method : C:\CHEM32\1\METHODS\DEF\_LC11.M  
 Last changed : 5/30/2019 3:18:19 PM  
 (modified after loading)  
 Sample Info : IB, Hexane/i-PrOH = 80/20, 0.8 mL/min, 30 oC, 254 nm

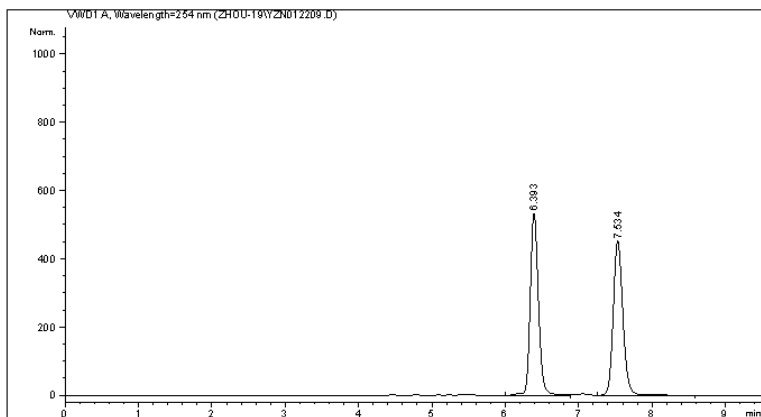

=====  
 Area Percent Report  
 =====

Sorted By : Signal  
 Multiplier: : 1.0000  
 Dilution: : 1.0000  
 Use Multiplier & Dilution Factor with ISTDs

Signal 1: VWD1 A, Wavelength=254 nm

| Peak # | RetTime [min] | Type | Width [min] | Area [mAU] | %s        | Height [mAU] | Area % |
|--------|---------------|------|-------------|------------|-----------|--------------|--------|
| 1      | 6.393         | VV   | 0.1201      | 4162.28418 | 533.65631 | 50.1410      |        |
| 2      | 7.534         | VB   | 0.1449      | 4138.87744 | 451.23529 | 49.8590      |        |

Totals : 8301.16162 984.89160

=====  
 \*\*\* End of Report \*\*\*

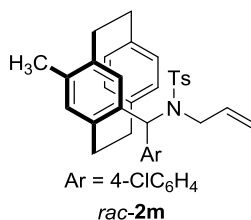

Data File C:\CHEM32\1\DATA\ZHOU-19\YZN012305.D  
 Sample Name: YZ-4-85BTM

=====  
 Acq. Operator :  
 Acq. Instrument : Instrument 1 Location : -  
 Injection Date : 4/4/2019 4:42:52 PM  
 Acq. Method : C:\CHEM32\1\METHODS\DEF\_LC11.M  
 Last changed : 4/4/2019 4:38:27 PM  
 (modified after loading)  
 Analysis Method : C:\CHEM32\1\METHODS\DEF\_LC11.M  
 Last changed : 5/30/2019 3:21:28 PM  
 (modified after loading)  
 Sample Info : IB, Hexane/i-PrOH = 80/20, 0.8 mL/min, 30 oC, 254nm

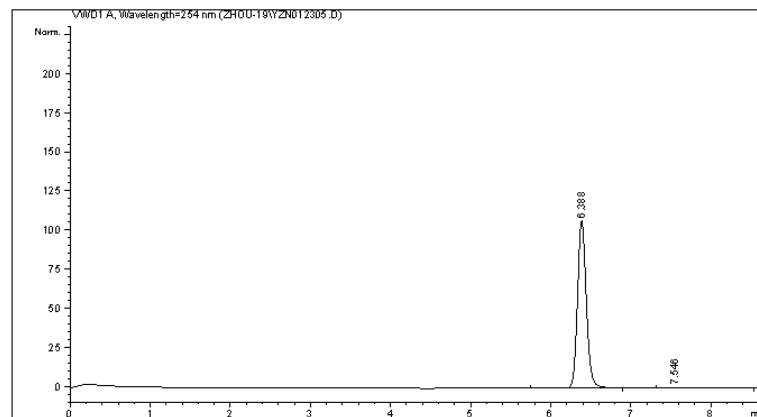

=====  
 Area Percent Report  
 =====

Sorted By : Signal  
 Multiplier: : 1.0000  
 Dilution: : 1.0000  
 Use Multiplier & Dilution Factor with ISTDs

Signal 1: VWD1 A, Wavelength=254 nm

| Peak # | RetTime [min] | Type | Width [min] | Area [mAU] | %s         | Height [mAU] | Area % |
|--------|---------------|------|-------------|------------|------------|--------------|--------|
| 1      | 6.388         | VV   | 0.1195      | 829.39233  | 107.05394  | 98.9261      |        |
| 2      | 7.546         | VB   | 0.2344      | 9.00354    | 5.42591e-1 | 1.0739       |        |

Totals : 838.39587 107.59653

=====  
 \*\*\* End of Report \*\*\*

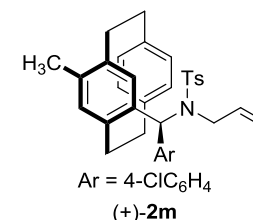

Data File C:\CHEM32\1\DATA\ZHOU-19\YZN013592.D  
 Sample Name: YZ-6-8SM(rac)

```

=====
Acq. Operator   :
Acq. Instrument : Instrument 1          Location : -
Injection Date  : 10/4/2019 7:59:13 AM
Acq. Method     : C:\CHEM32\1\METHODS\DEF_LC11.M
Last changed    : 10/4/2019 7:29:59 AM
                  (modified after loading)
Analysis Method : C:\CHEM32\1\METHODS\DEF_LC11.M
Last changed    : 10/8/2019 10:15:37 PM
                  (modified after loading)
Sample Info     : IA, Hexane/i-PrOH = 80/20, 0.8 mL/min, 30 oC, 254 nm
=====
  
```

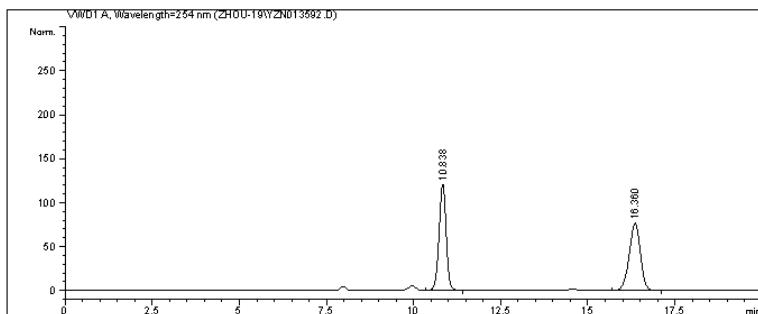

=====  
 Area Percent Report  
 =====

```

Sorted By      :      Signal
Multiplier:    :      1.0000
Dilution:      :      1.0000
Use Multiplier & Dilution Factor with ISTDs
  
```

Signal 1: VWD1 A, Wavelength=254 nm

| Peak # | RetTime [min] | Type | Width [min] | Area mAU *s | Height [mAU] | Area %  |
|--------|---------------|------|-------------|-------------|--------------|---------|
| 1      | 10.838        | VB   | 0.2183      | 1721.50732  | 121.04810    | 50.0515 |
| 2      | 16.360        | BB   | 0.3434      | 1717.96399  | 76.97136     | 49.9485 |

Totals : 3439.47131 198.01946

=====  
 \*\*\* End of Report \*\*\*

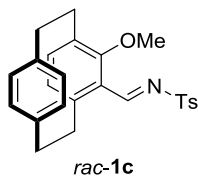

Data File C:\CHEM32\1\DATA\ZHOU-19\YZN013593.D  
 Sample Name: YZ-6-8SM

```

=====
Acq. Operator   :
Acq. Instrument : Instrument 1          Location : -
Injection Date  : 10/4/2019 8:29:25 AM
Acq. Method     : C:\CHEM32\1\METHODS\DEF_LC11.M
Last changed    : 10/4/2019 8:25:01 AM
                  (modified after loading)
Analysis Method : C:\CHEM32\1\METHODS\DEF_LC11.M
Last changed    : 10/8/2019 10:18:11 PM
                  (modified after loading)
Sample Info     : IA, Hexane/i-PrOH = 80/20, 0.8 mL/min, 30 oC, 254 nm
=====
  
```

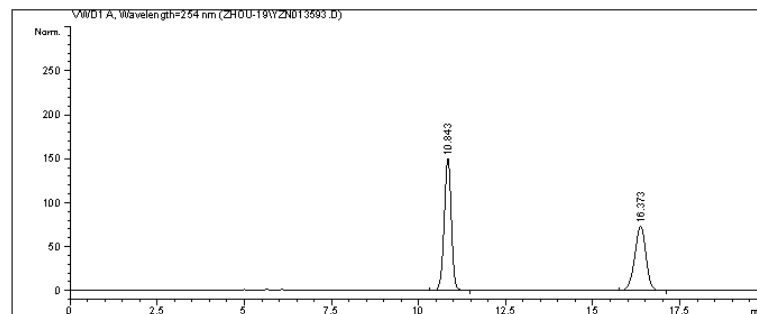

=====  
 Area Percent Report  
 =====

```

Sorted By      :      Signal
Multiplier:    :      1.0000
Dilution:      :      1.0000
Use Multiplier & Dilution Factor with ISTDs
  
```

Signal 1: VWD1 A, Wavelength=254 nm

| Peak # | RetTime [min] | Type | Width [min] | Area mAU *s | Height [mAU] | Area %  |
|--------|---------------|------|-------------|-------------|--------------|---------|
| 1      | 10.843        | VB   | 0.2182      | 2133.72656  | 150.12553    | 56.5968 |
| 2      | 16.373        | BB   | 0.3431      | 1636.32202  | 73.39268     | 43.4032 |

Totals : 3770.04858 223.51822

=====  
 \*\*\* End of Report \*\*\*

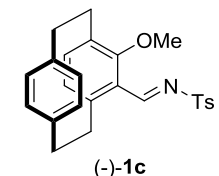

Kinetic resolution  
 from 4-ClC<sub>6</sub>H<sub>4</sub>B(OH)<sub>2</sub>

Data File C:\CHEM32\1\DATA\ZHOU-19\YZN013594.D  
 Sample Name: YZ-6-8TM(RAC)

=====  
 Acq. Operator :  
 Acq. Instrument : Instrument 1 Location : -  
 Injection Date : 10/7/2019 12:17:09 AM  
 Acq. Method : C:\CHEM32\1\METHODS\DEF\_LC11.M  
 Last changed : 10/6/2019 11:15:04 PM  
 (modified after loading)  
 Analysis Method : C:\CHEM32\1\METHODS\DEF\_LC11.M  
 Last changed : 10/8/2019 9:25:29 PM  
 (modified after loading)  
 Sample Info : IA, Hexane/i-PrOH = 90/10, 1.0 mL/min, 30 oC, 254 nm

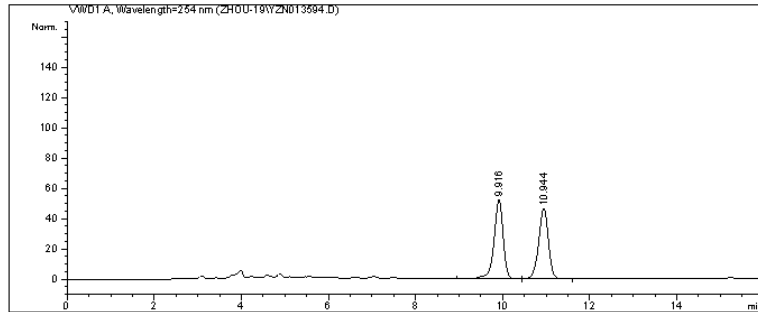

=====  
 Area Percent Report  
 =====

Sorted By : Signal  
 Multiplier: : 1.0000  
 Dilution: : 1.0000  
 Use Multiplier & Dilution Factor with ISTDs

Signal 1: WVD1 A, Wavelength=254 nm

| Peak # | RetTime [min] | Type | Width [min] | Area mAU *s | Height [mAU] | Area %  |
|--------|---------------|------|-------------|-------------|--------------|---------|
| 1      | 9.916         | VV   | 0.2252      | 774.40588   | 52.28675     | 51.4118 |
| 2      | 10.944        | VB   | 0.2416      | 731.87537   | 46.56057     | 48.5882 |

Totals : 1506.28125 98.84732

=====  
 \*\*\* End of Report \*\*\*

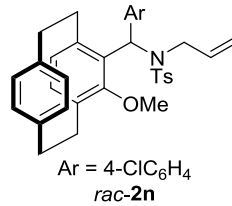

Data File C:\CHEM32\1\DATA\ZHOU-19\YZN013595.D  
 Sample Name: YZ-6-8TM

=====  
 Acq. Operator :  
 Acq. Instrument : Instrument 1 Location : -  
 Injection Date : 10/7/2019 2:33:03 AM  
 Acq. Method : C:\CHEM32\1\METHODS\DEF\_LC11.M  
 Last changed : 10/7/2019 2:15:22 AM  
 (modified after loading)  
 Analysis Method : C:\CHEM32\1\METHODS\DEF\_LC11.M  
 Last changed : 10/8/2019 11:09:42 PM  
 (modified after loading)  
 Sample Info : IA, Hexane/i-PrOH = 90/10, 1.0 mL/min, 30 oC, 254 nm

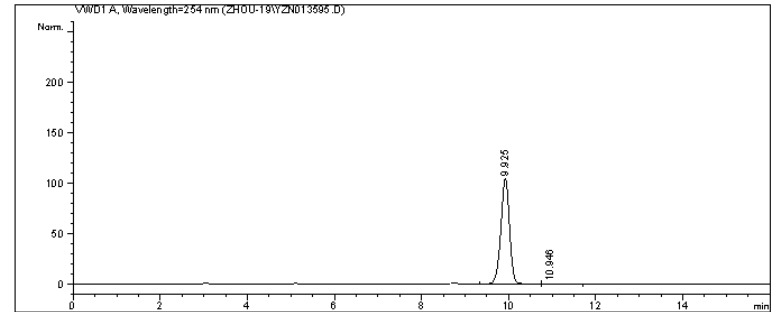

=====  
 Area Percent Report  
 =====

Sorted By : Signal  
 Multiplier: : 1.0000  
 Dilution: : 1.0000  
 Use Multiplier & Dilution Factor with ISTDs

Signal 1: WVD1 A, Wavelength=254 nm

| Peak # | RetTime [min] | Type | Width [min] | Area mAU *s | Height [mAU] | Area %  |
|--------|---------------|------|-------------|-------------|--------------|---------|
| 1      | 9.925         | VB   | 0.2147      | 1448.35022  | 104.10171    | 99.7152 |
| 2      | 10.946        | BB   | 0.3016      | 4.13618     | 1.77072e-1   | 0.2848  |

Totals : 1452.48640 104.27878

=====  
 \*\*\* End of Report \*\*\*

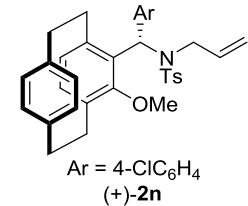

Data File C:\CHEM32\1\DATA\ZHOU2019\SIG1003079.D  
 Sample Name: YZ-4-58ESH(RAC)

```

=====
Acq. Operator   :
Acq. Instrument : 仪器 1                Location : Vial 1
Injection Date  : 5/30/19 9:38:00
                                           Inj Volume : 5.000 µl

Acq. Method    : C:\CHEM32\1\METHODS\DEF_LC11.M
Last changed   : 5/30/19 9:07:37
                (modified after loading)
Analysis Method: C:\CHEM32\1\METHODS\DEF_LC11.M
Last changed   : 5/30/19 10:07:23
                (modified after loading)
Sample Info    : AD-3, n-hexane/i-PrOH = 80/20, 0.8 mL/min, 30 oC, 254 n
                m
  
```

Additional Info : Peak(s) manually integrated  
 VW/D1 A, Wavelength=254nm (ZHOU2019\SIG1003079.D)

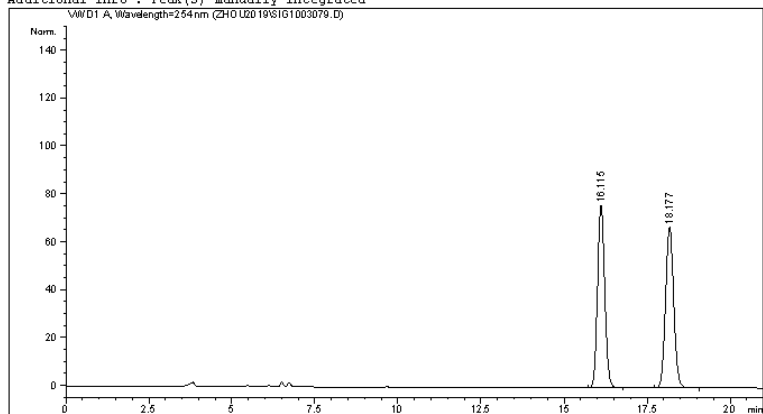

Area Percent Report

```

=====
Sorted By      :      Signal
Multiplier:    :      1.0000
Dilution:      :      1.0000
Use Multiplier & Dilution Factor with ISTDs
  
```

Signal 1: VW/D1 A, Wavelength=254 nm

| Peak # | RetTime [min] | Type | Width [min] | Area [mAU*s] | Height [mAU] | Area %  |
|--------|---------------|------|-------------|--------------|--------------|---------|
| 1      | 16.115        | BV   | 0.2366      | 1152.96143   | 76.14727     | 49.9519 |
| 2      | 18.177        | VB   | 0.2685      | 1155.18225   | 67.21445     | 50.0481 |

仪器 1 5/30/19 10:07:42

Page 1 of 2

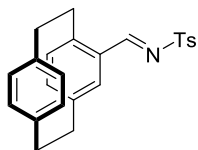

Data File C:\CHEM32\1\DATA\ZHOU2019\SIG1002884.D  
 Sample Name: YZ-4-89SM

```

=====
Acq. Operator   :
Acq. Instrument : 仪器 1                Location : Vial 1
Injection Date  : 4/15/19 15:25:10
                                           Inj Volume : 5.000 µl

Acq. Method    : C:\CHEM32\1\METHODS\DEF_LC11.M
Last changed   : 4/15/19 14:50:36
                (modified after loading)
Analysis Method: C:\CHEM32\1\METHODS\DEF_LC11.M
Last changed   : 5/30/19 11:24:17
                (modified after loading)
Sample Info    : AD-3, n-hexane/i-PrOH = 80/20, 0.8 mL/min, 30 oC, 254 n
                m
  
```

Additional Info : Peak(s) manually integrated  
 VW/D1 A, Wavelength=254nm (ZHOU2019\SIG1002884.D)

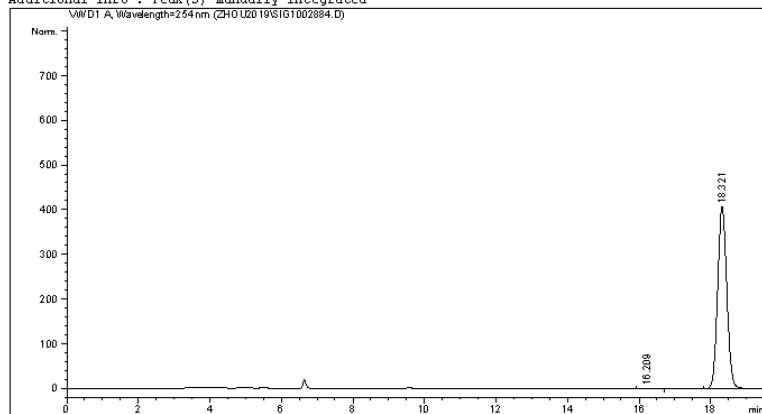

Area Percent Report

```

=====
Sorted By      :      Signal
Multiplier:    :      1.0000
Dilution:      :      1.0000
Use Multiplier & Dilution Factor with ISTDs
  
```

Signal 1: VW/D1 A, Wavelength=254 nm

| Peak # | RetTime [min] | Type | Width [min] | Area [mAU*s] | Height [mAU] | Area %  |
|--------|---------------|------|-------------|--------------|--------------|---------|
| 1      | 16.209        | BB   | 0.2479      | 4.46118      | 2.76951e-1   | 0.0620  |
| 2      | 18.321        | BBA  | 0.2743      | 7188.56885   | 406.57086    | 99.9380 |

仪器 1 5/30/19 11:24:24

Page 1 of 2

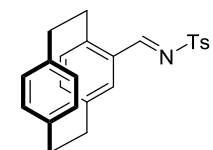

Data File C:\CHEM32\1\DATA\ZHOU-19\YZN012754.D  
 Sample Name: YZ-4-90(RAC)

```

=====
Acq. Operator   :
Acq. Instrument : Instrument 1          Location : -
Injection Date  : 5/30/2019 4:43:47 PM
Acq. Method     : C:\CHEM32\1\METHODS\DEF_LC11.M
Last changed    : 5/30/2019 4:22:40 PM
                  (modified after loading)
Analysis Method : C:\CHEM32\1\METHODS\DEF_LC11.M
Last changed    : 5/30/2019 6:06:15 PM
                  (modified after loading)
Sample Info     : AD-H, Hexane/i-PrOH = 60/40, 0.7 mL/min, 30 oC, 254 nm
  
```

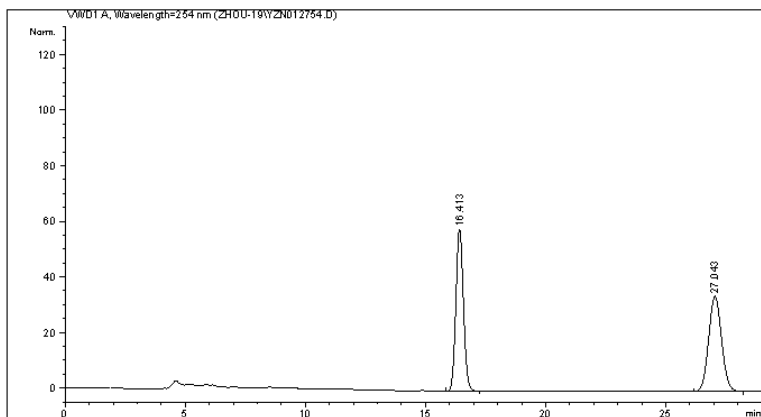

Area Percent Report

```

Sorted By      :      Signal
Multiplier:    :      1.0000
Dilution:      :      1.0000
Use Multiplier & Dilution Factor with ISTDs
  
```

Signal 1: VWD1 A, Wavelength=254 nm

| Peak # | RetTime [min] | Type | Width [min] | Area [mAU] | %s       | Height [mAU] | Area % |
|--------|---------------|------|-------------|------------|----------|--------------|--------|
| 1      | 16.413        | BB   | 0.3404      | 1280.18188 | 58.35740 | 49.9418      |        |
| 2      | 27.043        | BB   | 0.5851      | 1283.16443 | 34.29058 | 50.0582      |        |

Totals : 2563.34631 92.64797

\*\*\* End of Report \*\*\*

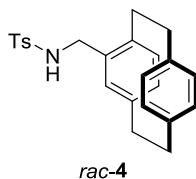

Data File C:\CHEM32\1\DATA\ZHOU-19\YZN012755.D  
 Sample Name: YZ-4-90

```

=====
Acq. Operator   :
Acq. Instrument : Instrument 1          Location : -
Injection Date  : 5/30/2019 5:16:44 PM
Acq. Method     : C:\CHEM32\1\METHODS\DEF_LC11.M
Last changed    : 5/30/2019 5:15:35 PM
                  (modified after loading)
Analysis Method : C:\CHEM32\1\METHODS\DEF_LC11.M
Last changed    : 5/30/2019 6:11:10 PM
                  (modified after loading)
Sample Info     : AD-H, Hexane/i-PrOH = 60/40, 0.7 mL/min, 30 oC, 254 nm
  
```

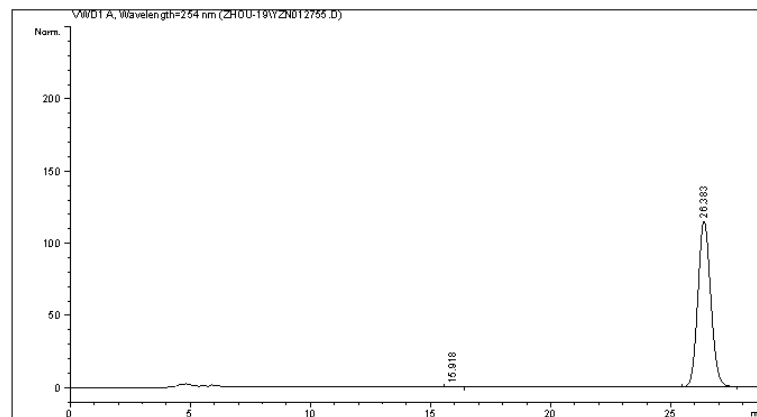

Area Percent Report

```

Sorted By      :      Signal
Multiplier:    :      1.0000
Dilution:      :      1.0000
Use Multiplier & Dilution Factor with ISTDs
  
```

Signal 1: VWD1 A, Wavelength=254 nm

| Peak # | RetTime [min] | Type | Width [min] | Area [mAU] | %s         | Height [mAU] | Area % |
|--------|---------------|------|-------------|------------|------------|--------------|--------|
| 1      | 15.918        | BB   | 0.2614      | 3.77989    | 1.80796e-1 | 0.0887       |        |
| 2      | 26.383        | BB   | 0.5753      | 4256.37598 | 114.78807  | 99.9113      |        |

Totals : 4260.15587 114.96887

\*\*\* End of Report \*\*\*

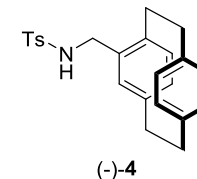

Data File D:\USERS\CHEMSTATION\1\DATA\ZHOU2019\YZ3000166.D  
Sample Name: YZ-4-99(RAC)

=====  
Acq. Operator : SYSTEM  
Sample Operator : SYSTEM  
Acq. Instrument : 1260II Location : 1  
Injection Date : 5/10/2019 11:35:04 AM Inj : 1  
Inj Volume : No inj  
Acq. Method : C:\Users\Public\Documents\ChemStation\1\Methods\def\_LC.M  
Last changed : 5/10/2019 9:35:07 AM by SYSTEM  
(modified after loading)  
Analysis Method : C:\Users\Public\Documents\ChemStation\1\Methods\def\_LC.M  
Last changed : 5/30/2019 4:48:00 PM by SYSTEM  
(modified after loading)  
Sample Info : IC, n-Hexane/i-PrOH = 90/10, 0.7 mL/min, 30 oC, 254 nm

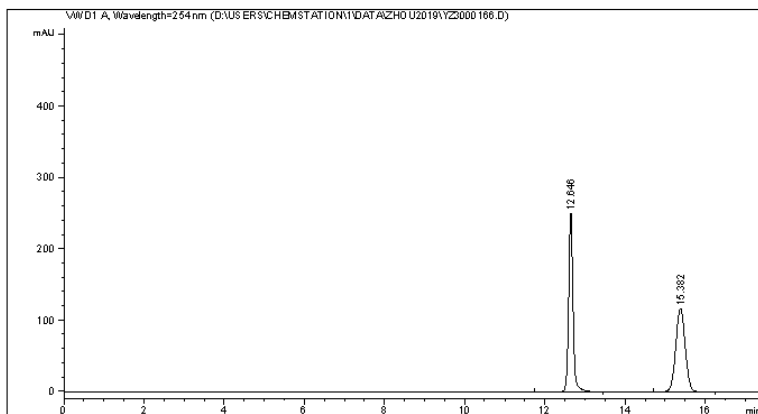

=====  
Area Percent Report  
=====

Sorted By : Signal  
Multiplier : 1.0000  
Dilution : 1.0000  
Do not use Multiplier & Dilution Factor with ISTDs

Signal 1: VWD1 A, Wavelength=254 nm

| Peak # | RetTime [min] | Type | Width [min] | Area [mAU*s] | Height [mAU] | Area %  |
|--------|---------------|------|-------------|--------------|--------------|---------|
| 1      | 12.646        | BB   | 0.1126      | 1885.05750   | 251.01039    | 49.9288 |
| 2      | 15.382        | BB   | 0.2521      | 1890.43579   | 116.64406    | 50.0712 |

Totals : 3775.49329 367.65445

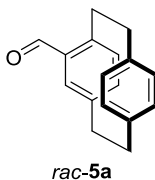

Data File D:\USERS\CHEMSTATION\1\DATA\ZHOU2019\YZ3000164.D  
Sample Name: YZ-4-99

=====  
Acq. Operator : SYSTEM  
Sample Operator : SYSTEM  
Acq. Instrument : 1260II Location : 1  
Injection Date : 5/10/2019 10:31:04 AM Inj : 1  
Inj Volume : No inj  
Acq. Method : C:\Users\Public\Documents\ChemStation\1\Methods\def\_LC.M  
Last changed : 5/10/2019 9:35:07 AM by SYSTEM  
(modified after loading)  
Analysis Method : C:\Users\Public\Documents\ChemStation\1\Methods\def\_LC.M  
Last changed : 5/30/2019 4:51:31 PM by SYSTEM  
(modified after loading)  
Sample Info : IC, n-Hexane/i-PrOH = 90/10, 0.7 mL/min, 30 oC, 254 nm

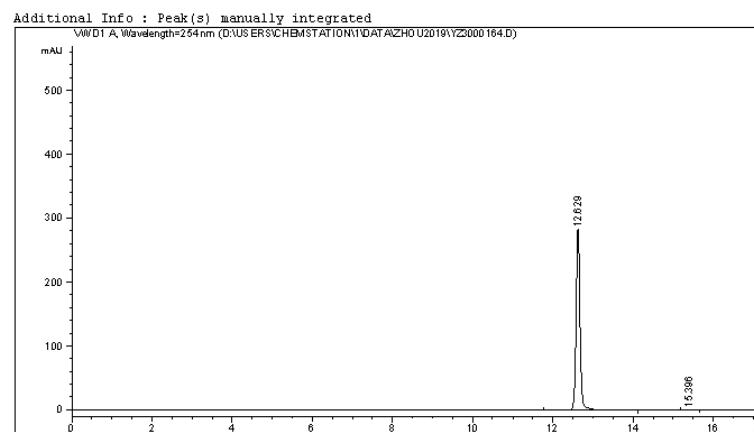

Additional Info : Peak(s) manually integrated

=====  
Area Percent Report  
=====

Sorted By : Signal  
Multiplier : 1.0000  
Dilution : 1.0000  
Do not use Multiplier & Dilution Factor with ISTDs

Signal 1: VWD1 A, Wavelength=254 nm

| Peak # | RetTime [min] | Type | Width [min] | Area [mAU*s] | Height [mAU] | Area %  |
|--------|---------------|------|-------------|--------------|--------------|---------|
| 1      | 12.629        | VB R | 0.1026      | 1896.74072   | 281.16125    | 99.9318 |
| 2      | 15.396        | VB   | 0.2399      | 1.29462      | 8.03803e-2   | 0.0682  |

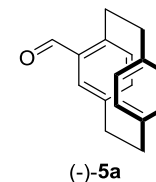

Data File C:\CHEM32\1\DATA\ZHOU2018\SIG1002068.D  
 Sample Name: YZ-4-34A(RAC)

```

=====
Acq. Operator   :
Acq. Instrument : 仪器 1                Location : Vial 91
Injection Date  : 12/8/18 10:42:08
                                           Inj Volume : 5.000 µl

Acq. Method    : C:\CHEM32\1\METHODS\DEF_LC11.M
Last changed   : 12/8/18 10:40:33
                (modified after loading)
Analysis Method : C:\CHEM32\1\METHODS\DEF_LC11.M
Last changed   : 5/30/19 9:41:08
                (modified after loading)
Sample Info    : AD-H, n-hexane/i-PrOH = 90/10, 1.0 mL/min, 30 oC, 254 n
                m
  
```

Additional Info : Peak(s) manually integrated  
 VWDL A, Wavelength=254nm (ZHOU2018\SIG1002068.D)

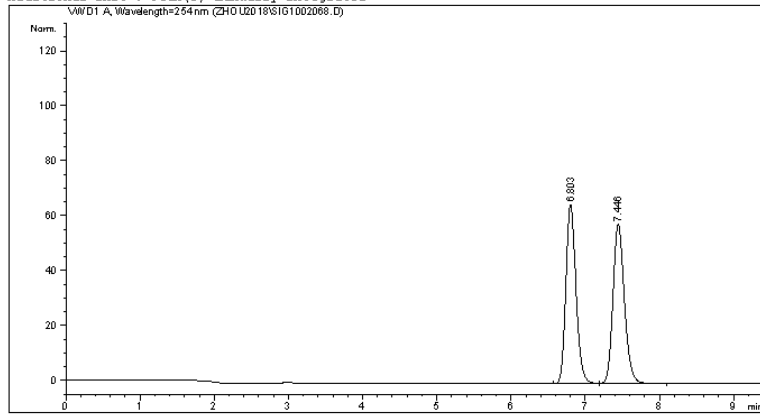

Area Percent Report

```

Sorted By      :      Signal
Multiplier:    :      1.0000
Dilution:      :      1.0000
Use Multiplier & Dilution Factor with ISTDs
  
```

Signal 1: VWDL A, Wavelength=254 nm

| Peak # | RetTime [min] | Type | Width [min] | Area [mAU*s] | Height [mAU] | Area %  |
|--------|---------------|------|-------------|--------------|--------------|---------|
| 1      | 6.803         | VV   | 0.1468      | 616.60956    | 64.94445     | 49.8919 |
| 2      | 7.446         | VB   | 0.1690      | 619.28156    | 57.78165     | 50.1081 |

仪器 1 5/30/19 9:41:19

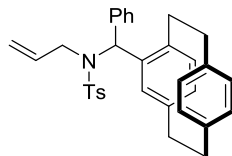

rac-2a

Data File C:\CHEM32\1\DATA\ZHOU2019\SIG1002905.D  
 Sample Name: YZ-4-89

```

=====
Acq. Operator   :
Acq. Instrument : 仪器 1                Location : Vial 1
Injection Date   : 4/18/19 19:24:49
                                           Inj Volume : 5.000 µl

Acq. Method    : C:\CHEM32\1\METHODS\DEF_LC11.M
Last changed   : 4/18/19 19:17:25
                (modified after loading)
Analysis Method : C:\CHEM32\1\METHODS\DEF_LC11.M
Last changed   : 5/30/19 11:26:22
                (modified after loading)
Sample Info    : AD-H, n-hexane/i-PrOH = 90/10, 1.0 mL/min, 30 oC, 254 n
                m
  
```

Additional Info : Peak(s) manually integrated  
 VWDL A, Wavelength=254nm (ZHOU2019\SIG1002905.D)

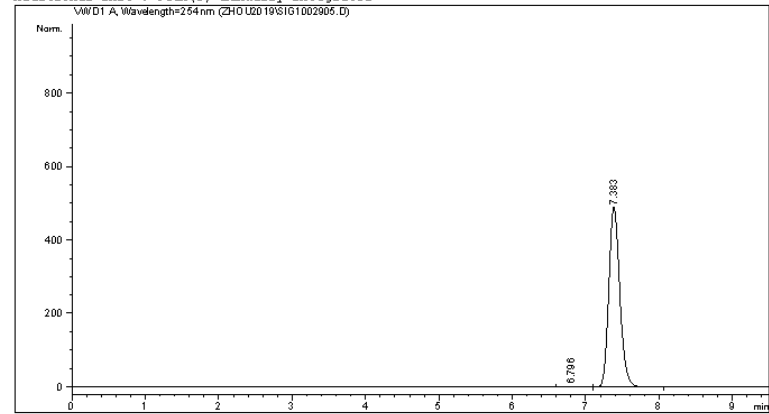

Area Percent Report

```

Sorted By      :      Signal
Multiplier:    :      1.0000
Dilution:      :      1.0000
Use Multiplier & Dilution Factor with ISTDs
  
```

Signal 1: VWDL A, Wavelength=254 nm

| Peak # | RetTime [min] | Type | Width [min] | Area [mAU*s] | Height [mAU] | Area %  |
|--------|---------------|------|-------------|--------------|--------------|---------|
| 1      | 6.796         | VV   | 0.2092      | 15.77220     | 1.06260      | 0.3078  |
| 2      | 7.383         | VV   | 0.1618      | 5108.03760   | 489.32965    | 99.6922 |

仪器 1 5/30/19 11:26:33

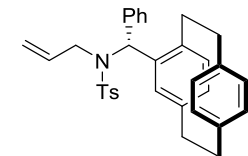

(-)-2a

Data File C:\CHEM32\1\DATA\ZHOU2019\SIG1002966.D  
 Sample Name: YZ-4-97RAC

```

=====
Acq. Operator   :
Acq. Instrument : 仪器 1                Location : Vial 1
Injection Date  : 5/7/19 15:17:34
                                           Inj Volume : 5.000 µl

Acq. Method    : C:\CHEM32\1\METHODS\DEF_LC11.M
Last changed   : 5/7/19 15:10:19
                (modified after loading)
Analysis Method: C:\CHEM32\1\METHODS\DEF_LC11.M
Last changed   : 5/30/19 11:30:52
                (modified after loading)
Sample Info    : AD-H, n-hexane/i-PrOH = 90/10, 1.0 mL/min, 30 oC, 254 n
                m
  
```

Additional Info : Peak(s) manually integrated  
 VWDL A, Wavelength=254nm (ZHOU2019\SIG1002966.D)

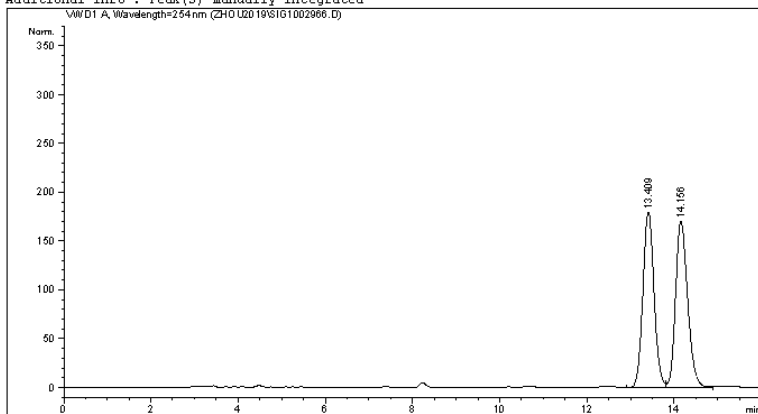

Area Percent Report

```

=====
Sorted By      :      Signal
Multiplier:    :      1.0000
Dilution:      :      1.0000
Use Multiplier & Dilution Factor with ISTDs
  
```

Signal 1: VWDL A, Wavelength=254 nm

| Peak # | RetTime [min] | Type | Width [min] | Area [mAU*s] | Height [mAU] | Area %  |
|--------|---------------|------|-------------|--------------|--------------|---------|
| 1      | 13.409        | VV   | 0.2764      | 3212.07471   | 179.84615    | 49.3653 |
| 2      | 14.156        | VV   | 0.2974      | 3294.67456   | 170.52757    | 50.6347 |

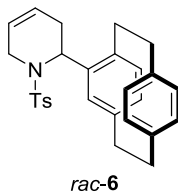

Data File C:\CHEM32\1\DATA\ZHOU2019\SIG1002967.D  
 Sample Name: YZ-4-97

```

=====
Acq. Operator   :
Acq. Instrument : 仪器 1                Location : Vial 1
Injection Date  : 5/7/19 15:42:58
                                           Inj Volume : 5.000 µl

Acq. Method    : C:\CHEM32\1\METHODS\DEF_LC11.M
Last changed   : 5/7/19 15:36:07
                (modified after loading)
Analysis Method: C:\CHEM32\1\METHODS\DEF_LC11.M
Last changed   : 5/30/19 11:32:57
                (modified after loading)
Sample Info    : AD-H, n-hexane/i-PrOH = 90/10, 1.0 mL/min, 30 oC, 254 n
                m
  
```

Additional Info : Peak(s) manually integrated  
 VWDL A, Wavelength=254nm (ZHOU2019\SIG1002967.D)

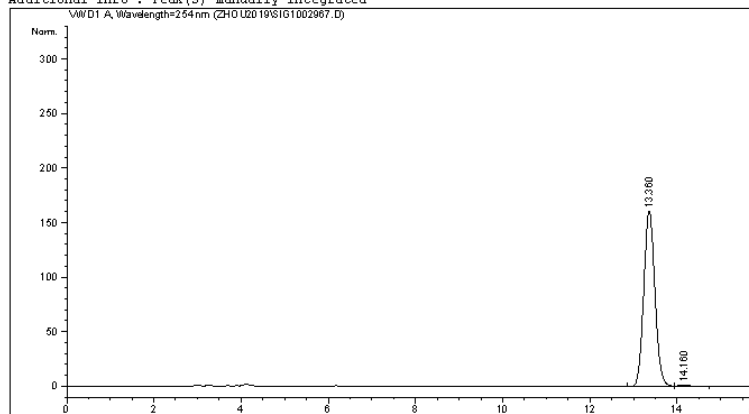

Area Percent Report

```

=====
Sorted By      :      Signal
Multiplier:    :      1.0000
Dilution:      :      1.0000
Use Multiplier & Dilution Factor with ISTDs
  
```

Signal 1: VWDL A, Wavelength=254 nm

| Peak # | RetTime [min] | Type | Width [min] | Area [mAU*s] | Height [mAU] | Area %  |
|--------|---------------|------|-------------|--------------|--------------|---------|
| 1      | 13.360        | VV   | 0.2753      | 2854.07349   | 160.65536    | 99.2197 |
| 2      | 14.160        | VB   | 0.3117      | 22.44633     | 1.07450      | 0.7803  |

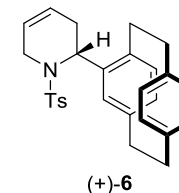



Data File C:\CHEM32\1\DATA\ZHOU2018\SIG1002068.D  
 Sample Name: YZ-4-34A(RAC)

```

=====
Acq. Operator   :
Acq. Instrument : 仪器 1                Location : Vial 91
Injection Date  : 12/8/18 10:42:08
                                           Inj Volume : 5.000 µl

Acq. Method    : C:\CHEM32\1\METHODS\DEF_LC11.M
Last changed   : 12/8/18 10:40:33
                (modified after loading)
Analysis Method: C:\CHEM32\1\METHODS\DEF_LC11.M
Last changed   : 5/30/19 9:41:08
                (modified after loading)
Sample Info    : AD-H, n-hexane/i-PrOH = 90/10, 1.0 mL/min, 30 oC, 254 n
                m
  
```

Additional Info : Peak(s) manually integrated  
 VWDL A, Wavelength=254nm (ZHO02018\SIG1002068.D)

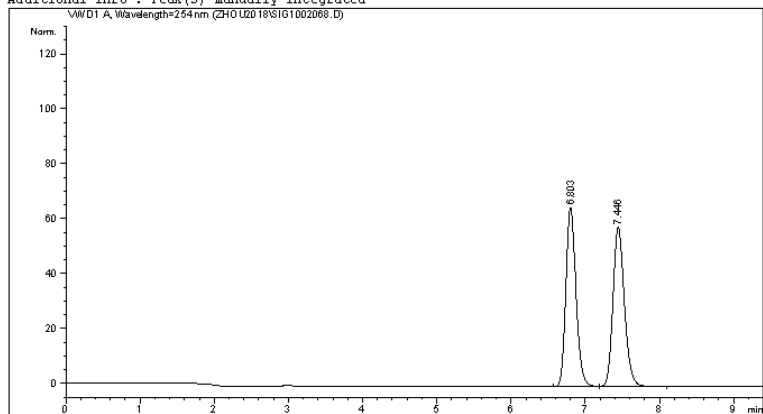

Area Percent Report

```

Sorted By      :      Signal
Multiplier:    :      1.0000
Dilution:      :      1.0000
Use Multiplier & Dilution Factor with ISTDs
  
```

Signal 1: VWDL A, Wavelength=254 nm

| Peak # | RetTime [min] | Type | Width [min] | Area [mAU*s] | Height [mAU] | Area %  |
|--------|---------------|------|-------------|--------------|--------------|---------|
| 1      | 6.803         | VV   | 0.1468      | 616.60956    | 64.94445     | 49.8919 |
| 2      | 7.446         | VB   | 0.1690      | 619.28156    | 57.78165     | 50.1081 |

仪器 1 5/30/19 9:41:19

Page 1 of 2

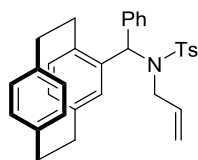

Data File C:\CHEM32\1\DATA\ZHOU2019\SIG1003031.D  
 Sample Name: YZ-5-45H

```

=====
Acq. Operator   :
Acq. Instrument : 仪器 1                Location : Vial 1
Injection Date   : 5/17/19 19:45:19
                                           Inj Volume : 5.000 µl

Acq. Method    : C:\CHEM32\1\METHODS\DEF_LC11.M
Last changed   : 5/17/19 19:05:30
                (modified after loading)
Analysis Method: C:\CHEM32\1\METHODS\DEF_LC11.M
Last changed   : 5/30/19 11:37:07
                (modified after loading)
Sample Info    : AD-H, n-hexane/i-PrOH = 90/10, 1.0 mL/min, 30 oC, 254 n
                m
  
```

Additional Info : Peak(s) manually integrated  
 VWDL A, Wavelength=254nm (ZHO02019\SIG1003031.D)

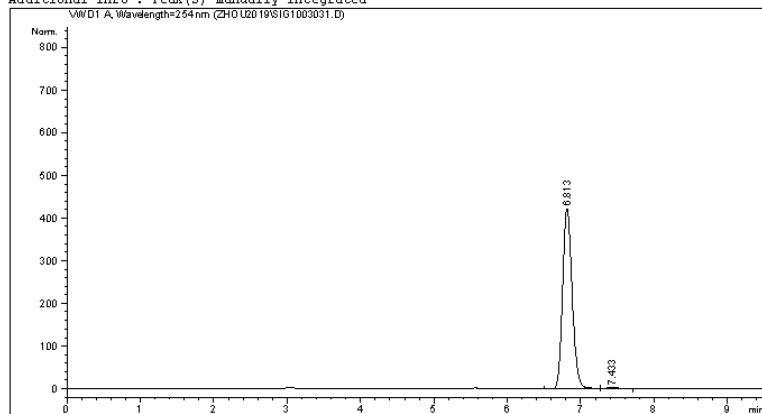

Area Percent Report

```

Sorted By      :      Signal
Multiplier:    :      1.0000
Dilution:      :      1.0000
Use Multiplier & Dilution Factor with ISTDs
  
```

Signal 1: VWDL A, Wavelength=254 nm

| Peak # | RetTime [min] | Type | Width [min] | Area [mAU*s] | Height [mAU] | Area %  |
|--------|---------------|------|-------------|--------------|--------------|---------|
| 1      | 6.813         | VV   | 0.1375      | 3814.08960   | 421.62192    | 99.2674 |
| 2      | 7.433         | VV   | 0.1819      | 28.14677     | 2.31449      | 0.7326  |

仪器 1 5/30/19 11:37:21

Page 1 of 2

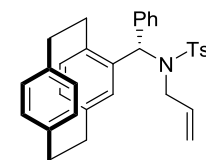

Data File D:\USERS\CHEMSTATION\1\DATA\ZHOU2019\YZ3000216.D  
 Sample Name: YZ-5-4RAC

```

=====
Acq. Operator   : SYSTEM
Sample Operator : SYSTEM
Acq. Instrument : 1260II                Location : 1
Injection Date  : 5/17/2019 4:37:26 PM Inj       : 1
                                           Inj Volume: No inj
Acq. Method     : C:\Users\Public\Documents\ChemStation\1\Methods\def_LC.M
Last changed    : 5/17/2019 4:32:37 PM by SYSTEM
                 (modified after loading)
Analysis Method : C:\Users\Public\Documents\ChemStation\1\Methods\def_LC.M
Last changed    : 5/30/2019 4:53:40 PM by SYSTEM
                 (modified after loading)
Sample Info     : IA, n-Hexane/i-PrOH = 98/2, 1.0 mL/min, 30 oC, 254 nm
  
```

Additional Info : Peak(s) manually integrated

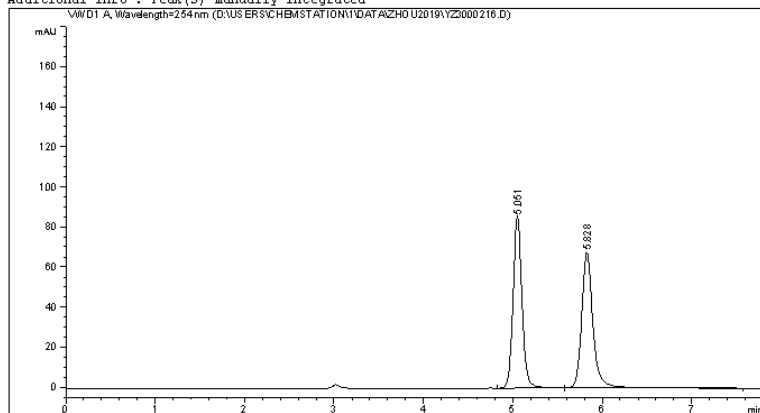

Area Percent Report

```

Sorted By      : Signal
Multiplier     : 1.0000
Dilution       : 1.0000
Do not use Multiplier & Dilution Factor with ISTDs
  
```

Signal 1: WVD1 A, Wavelength=254 nm

| Peak # | RetTime [min] | Type | Width [min] | Area [mAU*s] | Height [mAU] | Area %  |
|--------|---------------|------|-------------|--------------|--------------|---------|
| 1      | 5.051         | BB   | 0.1053      | 593.43890    | 85.17809     | 50.1176 |
| 2      | 5.828         | BV R | 0.1341      | 590.65308    | 67.34789     | 49.8824 |

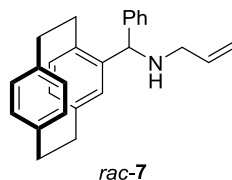

Data File D:\USERS\CHEMSTATION\1\DATA\ZHOU2019\YZ3000217.D  
 Sample Name: YZ-5-4

```

=====
Acq. Operator   : SYSTEM
Sample Operator : SYSTEM
Acq. Instrument : 1260II                Location : 1
Injection Date  : 5/17/2019 5:00:29 PM Inj       : 1
                                           Inj Volume: No inj
Acq. Method     : C:\Users\Public\Documents\ChemStation\1\Methods\def_LC.M
Last changed    : 5/17/2019 4:32:37 PM by SYSTEM
                 (modified after loading)
Analysis Method : C:\Users\Public\Documents\ChemStation\1\Methods\def_LC.M
Last changed    : 5/30/2019 5:01:27 PM by SYSTEM
                 (modified after loading)
Sample Info     : IA, n-Hexane/i-PrOH = 98/2, 1.0 mL/min, 30 oC, 254 nm
  
```

Additional Info : Peak(s) manually integrated

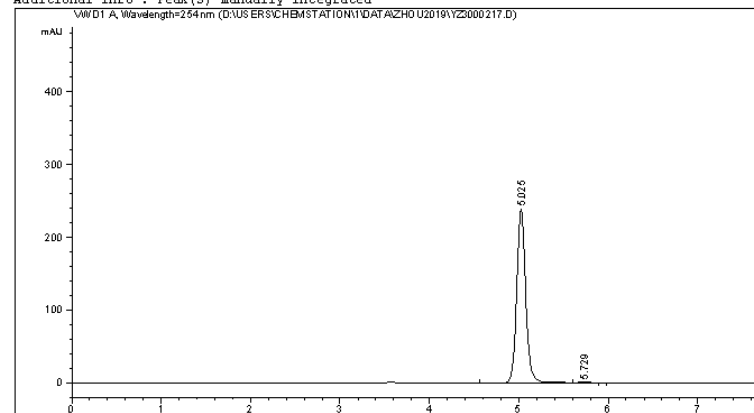

Area Percent Report

```

Sorted By      : Signal
Multiplier     : 1.0000
Dilution       : 1.0000
Do not use Multiplier & Dilution Factor with ISTDs
  
```

Signal 1: WVD1 A, Wavelength=254 nm

| Peak # | RetTime [min] | Type | Width [min] | Area [mAU*s] | Height [mAU] | Area %  |
|--------|---------------|------|-------------|--------------|--------------|---------|
| 1      | 5.025         | VV R | 0.1057      | 1674.16895   | 238.95752    | 99.6326 |
| 2      | 5.729         | VB E | 0.1184      | 6.17409      | 8.33798e-1   | 0.3674  |

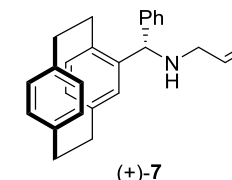

Data File C:\CHEM32\1\DATA\ZHOU2019\SIG1003079.D  
 Sample Name: YZ-4-585M(RAC)

```

=====
Acq. Operator   :
Acq. Instrument : 仪器 1                Location : Vial 1
Injection Date  : 5/30/19 9:38:00
                                           Inj Volume : 5.000 µl

Acq. Method    : C:\CHEM32\1\METHODS\DEF_LC11.M
Last changed   : 5/30/19 9:07:37
                (modified after loading)
Analysis Method : C:\CHEM32\1\METHODS\DEF_LC11.M
Last changed   : 5/30/19 10:07:23
                (modified after loading)
Sample Info    : AD-3, n-hexane/i-PrOH = 80/20, 0.8 mL/min, 30 oC, 254 n
                m
  
```

Additional Info : Peak(s) manually integrated  
 VW/D1 A, Wavelength=254nm (ZHOU2019\SIG1003079.D)

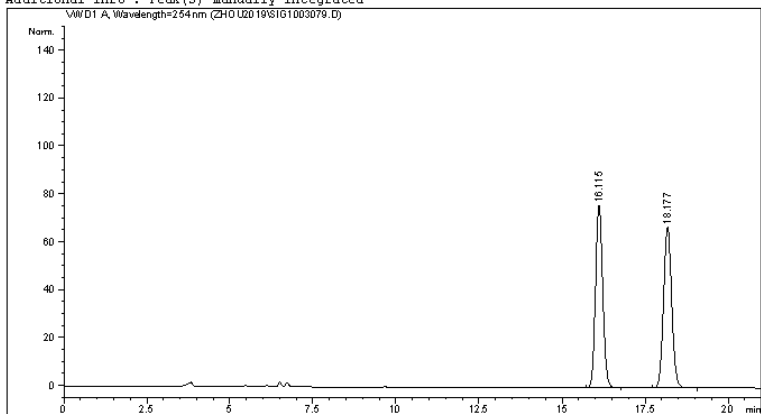

Area Percent Report

```

=====
Sorted By      :      Signal
Multiplier:    :      1.0000
Dilution:      :      1.0000
Use Multiplier & Dilution Factor with ISTDs
  
```

Signal 1: VW/D1 A, Wavelength=254 nm

| Peak # | RetTime [min] | Type | Width [min] | Area [mAU*s] | Height [mAU] | Area %  |
|--------|---------------|------|-------------|--------------|--------------|---------|
| 1      | 16.115        | BV   | 0.2366      | 1152.96143   | 76.14727     | 49.9519 |
| 2      | 18.177        | VB   | 0.2685      | 1155.18225   | 67.21445     | 50.0481 |

仪器 1 5/30/19 10:07:42

Page 1 of 2

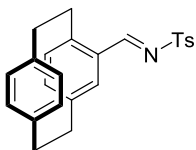

rac-1a

Data File C:\CHEM32\1\DATA\ZHOU2019\SIG1002867.D  
 Sample Name: YZ-4-875M

```

=====
Acq. Operator   :
Acq. Instrument : 仪器 1                Location : Vial 1
Injection Date  : 4/10/19 13:52:10
                                           Inj Volume : 5.000 µl

Acq. Method    : C:\CHEM32\1\METHODS\DEF_LC11.M
Last changed   : 4/10/19 13:21:10
                (modified after loading)
Analysis Method : C:\CHEM32\1\METHODS\DEF_LC11.M
Last changed   : 5/30/19 11:18:21
                (modified after loading)
Sample Info    : AD-3, n-hexane/i-PrOH = 80/20, 0.8 mL/min, 30 oC, 254 n
                m
  
```

Additional Info : Peak(s) manually integrated  
 VW/D1 A, Wavelength=254nm (ZHOU2019\SIG1002867.D)

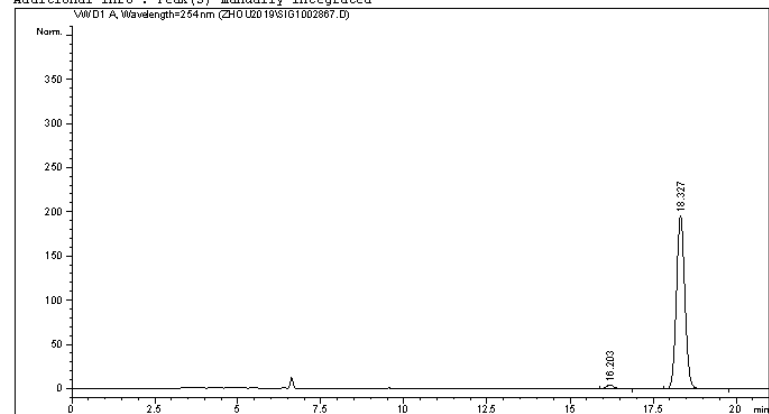

Area Percent Report

```

=====
Sorted By      :      Signal
Multiplier:    :      1.0000
Dilution:      :      1.0000
Use Multiplier & Dilution Factor with ISTDs
  
```

Signal 1: VW/D1 A, Wavelength=254 nm

| Peak # | RetTime [min] | Type | Width [min] | Area [mAU*s] | Height [mAU] | Area %  |
|--------|---------------|------|-------------|--------------|--------------|---------|
| 1      | 16.203        | VB   | 0.2422      | 71.66651     | 4.58964      | 2.0196  |
| 2      | 18.327        | BB   | 0.2744      | 3476.82568   | 196.49471    | 97.9804 |

仪器 1 5/30/19 11:18:25

Page 1 of 2

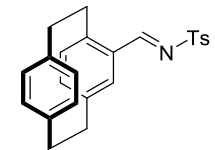

(-)-1a

Data File C:\CHEM32\1\DATA\ZHOU2018\SIG1002068.D  
 Sample Name: YZ-4-34A(RAC)

```

=====
Acq. Operator   :
Acq. Instrument : 仪器 1                Location : Vial 91
Injection Date  : 12/8/18 10:42:08
                                           Inj Volume : 5.000 µl

Acq. Method    : C:\CHEM32\1\METHODS\DEF_LC11.M
Last changed   : 12/8/18 10:40:33
                (modified after loading)
Analysis Method : C:\CHEM32\1\METHODS\DEF_LC11.M
Last changed   : 5/30/19 9:41:08
                (modified after loading)
Sample Info    : AD-H, n-hexane/i-PrOH = 90/10, 1.0 mL/min, 30 oC, 254 n
                m
  
```

Additional Info : Peak(s) manually integrated  
 VWDL A, Wavelength=254nm (ZHOU2018\SIG1002068.D)

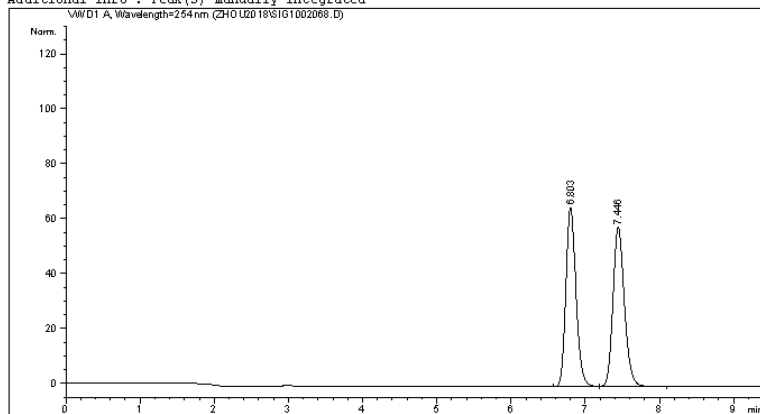

Area Percent Report

```

Sorted By      :      Signal
Multiplier:    :      1.0000
Dilution:      :      1.0000
Use Multiplier & Dilution Factor with ISTDs
  
```

Signal 1: VWDL A, Wavelength=254 nm

| Peak # | RetTime [min] | Type | Width [min] | Area [mAU*s] | Height [mAU] | Area %  |
|--------|---------------|------|-------------|--------------|--------------|---------|
| 1      | 6.803         | VV   | 0.1468      | 616.60956    | 64.94445     | 49.8919 |
| 2      | 7.446         | VB   | 0.1690      | 619.28156    | 57.78165     | 50.1081 |

仪器 1 5/30/19 9:41:19

Page 1 of 2

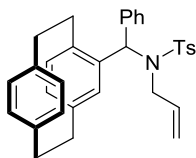

Data File C:\CHEM32\1\DATA\ZHOU2019\SIG1002893.D  
 Sample Name: YZ-4-87TH

```

=====
Acq. Operator   :
Acq. Instrument : 仪器 1                Location : Vial 1
Injection Date   : 4/17/19 15:11:09
                                           Inj Volume : 5.000 µl

Acq. Method    : C:\CHEM32\1\METHODS\DEF_LC11.M
Last changed   : 4/17/19 14:28:15
                (modified after loading)
Analysis Method : C:\CHEM32\1\METHODS\DEF_LC11.M
Last changed   : 5/30/19 11:21:01
                (modified after loading)
Sample Info    : AD-H, n-hexane/i-PrOH = 90/10, 1.0 mL/min, 30 oC, 254 n
                m
  
```

Additional Info : Peak(s) manually integrated  
 VWDL A, Wavelength=254nm (ZHOU2019\SIG1002893.D)

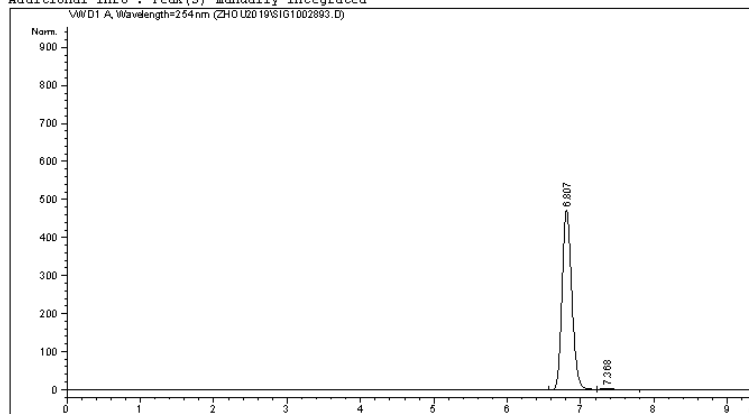

Area Percent Report

```

Sorted By      :      Signal
Multiplier:    :      1.0000
Dilution:      :      1.0000
Use Multiplier & Dilution Factor with ISTDs
  
```

Signal 1: VWDL A, Wavelength=254 nm

| Peak # | RetTime [min] | Type | Width [min] | Area [mAU*s] | Height [mAU] | Area %  |
|--------|---------------|------|-------------|--------------|--------------|---------|
| 1      | 6.807         | VV   | 0.1430      | 4333.33105   | 472.46912    | 99.0518 |
| 2      | 7.368         | VV   | 0.1897      | 41.48112     | 3.23173      | 0.9482  |

仪器 1 5/30/19 11:21:10

Page 1 of 2

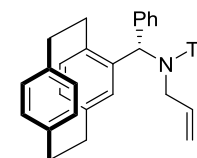

Supplement: c9qo01011d1.pdf [file c9qo01011d1.pdf]
